# Supplementary material
Source: publisher figshare collection journal article supplement (https://acs.figshare.com/ndownloader/files/14162414)

## *Supporting Information*

### **Cp\*Co<sup>III</sup>-Catalyzed Alkylation of Primary and Secondary C(sp<sup>3</sup>)-H Bonds of 8-Alkylquinolines with Maleimides**

Rakesh Kumar, Rohit Kumar, Devesh Chandra and Upendra Sharma\*

Natural Product Chemistry and Process Development Division and AcSIR, CSIR-IHBT, Palampur, India

Email: [upendra@ihbt.res.in](mailto:upendra@ihbt.res.in); [upendraithbt@gmail.com](mailto:upendraithbt@gmail.com)

Web address: <http://www.ihbt.res.in/en/staff/scientific-staff?chronoform=sctdetail&task=detail&id=41>

#### *Table of Contents*

| Entry | Title                                                          | Page No. |
|-------|----------------------------------------------------------------|----------|
| 1     | Reaction of 8-methyl quinoline with <i>N</i> -methyl maleimide | SI2      |
| 2     | Reaction of 8-ethyl quinoline with <i>N</i> -methyl maleimide  | SI3      |
| 2     | Mechanistic Study                                              | SI4-SI11 |
| 3     | <sup>1</sup> H and <sup>13</sup> C Spectral data               | SI2-SI54 |

# 1. Reaction of 8-methyl quinoline with N-methyl maleimide

## 1.1 Table S1. Optimization details

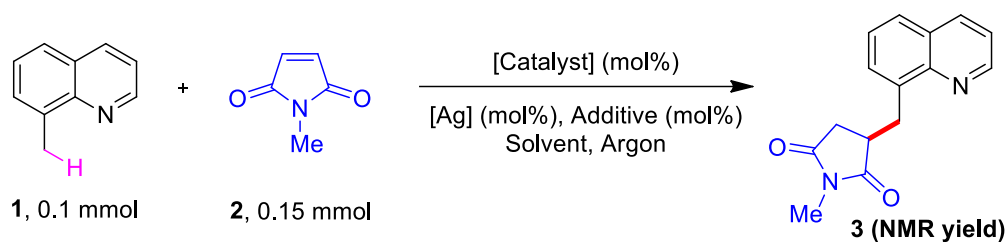

| Entry           | Catalyst (mol%)                                          | [Ag] (mol%)                   | Additive (mol%)    | Solvent          | Temp. (°C) | NMR Yield (%) <sup>b</sup> |
|-----------------|----------------------------------------------------------|-------------------------------|--------------------|------------------|------------|----------------------------|
| 1               | Cp*Co(CO)I <sub>2</sub> (10)                             | AgSbF <sub>6</sub> (20)       | -                  | TFE              | 100        | 10                         |
| 2               | Cp*Co(CO)I <sub>2</sub> (10)                             | -                             | AdCOOH (20)        | TFE              | 100        | 25                         |
| 3               | Cp*Co(CO)I <sub>2</sub> (10)                             | -                             | -                  | TFE              | 100        | n.d.                       |
| 4               | -                                                        | AgOTf (20)                    | AdCOOH (20)        | TFE              | 100        | n.d.                       |
| 5               | Cp*Co(CO)I <sub>2</sub> (10)                             | AgOTf (20)                    | NaOAc (20)         | TFE              | 100        | 40                         |
| 6               | Cp*Co(CO)I <sub>2</sub> (10)                             | AgOTf (20)                    | PivOH (20)         | TFE              | 100        | 22                         |
| 7               | Cp*Co(CO)I <sub>2</sub> (10)                             | AgOTf (20)                    | AcOH (20)          | TFE              | 100        | 25                         |
| 8               | <b>Cp*Co(CO)I<sub>2</sub> (10)</b>                       | <b>AgNTf<sub>2</sub> (20)</b> | <b>AdCOOH (20)</b> | <b>TFE</b>       | <b>100</b> | <b>98</b>                  |
| 9               | Cp*Co(CO)I <sub>2</sub> (10)                             | AgSbF <sub>6</sub> (20)       | AdCOOH (20)        | TFE              | 100        | 85                         |
| 10              | <b>Cp*Co(CO)I<sub>2</sub> (10)</b>                       | <b>AgOTf (20)</b>             | <b>NaOPiv (20)</b> | <b>TFE</b>       | <b>100</b> | <b>95</b>                  |
| 11              | <b>Cp*Co(CO)I<sub>2</sub> (10)</b>                       | <b>AgOTf (20)</b>             | <b>AdCOOH (20)</b> | <b>TFE</b>       | <b>100</b> | <b>98</b>                  |
| 12              | <b>Cp*Co(CO)I<sub>2</sub> (5)</b>                        | <b>AgOTf (10)</b>             | <b>AdCOOH (10)</b> | <b>TFE</b>       | <b>100</b> | <b>95 (92)<sup>c</sup></b> |
| 13              | Cp*Co(CO)I <sub>2</sub> (10)                             | AgOTf (20)                    | AdCOOH (20)        | TFE              | Rt         | 15                         |
| 14              | Cp*Co(CO)I <sub>2</sub> (10)                             | AgOTf (20)                    | AdCOOH (20)        | TFE              | 50         | 30                         |
| 15              | Cp*Co(CO)I <sub>2</sub> (10)                             | AgOTf (20)                    | AdCOOH (20)        | TFE              | 80         | 75                         |
| 16              | Cp*Co(CO)I <sub>2</sub> (10)                             | AgOTf (20)                    | AdCOOH (20)        | TFE              | 70         | 70                         |
| 17              | Cp*Co(CO)I <sub>2</sub> (10)                             | AgOTf (20)                    | AdCOOH (20)        | TFE              | 90         | 90                         |
| 18              | [Ru( <i>p</i> -cymene)Cl <sub>2</sub> ] <sub>2</sub> (5) | AgOTf (20)                    | AdCOOH (20)        | TFE              | 100        | 40                         |
| 19              | [Cp*RhCl <sub>2</sub> ] <sub>2</sub> (5)                 | AgOTf (20)                    | AdCOOH (20)        | TFE              | 100        | 40                         |
| 20              | [Cp*IrCl <sub>2</sub> ] <sub>2</sub> (5)                 | AgOTf (20)                    | AdCOOH (20)        | TFE              | 100        | n.d.                       |
| 21              | Cp*Co(CO)I <sub>2</sub> (10)                             | AgOTf (20)                    | AdCOOH (20)        | DCE              | 100        | 46                         |
| 22              | Cp*Co(CO)I <sub>2</sub> (10)                             | AgOTf (20)                    | AdCOOH (20)        | toluene          | 100        | n.d.                       |
| 23              | Cp*Co(CO)I <sub>2</sub> (10)                             | AgOTf (20)                    | AdCOOH (20)        | ACN              | 100        | n.d.                       |
| 24              | Cp*Co(CO)I <sub>2</sub> (10)                             | AgOTf (20)                    | AdCOOH (20)        | H <sub>2</sub> O | 100        | n.d.                       |
| 25 <sup>c</sup> | Cp*Co(CO)I <sub>2</sub> (10)                             | AgOTf (20)                    | AdCOOH (20)        | TFE              | 100        | 46                         |

<sup>a</sup>reaction conditions: 1a (0.1 mmol), 2a (0.15 mmol), solvent (0.5 ml), under argon. <sup>b</sup>NMR yield of crude reaction mixture was calculated by using tetrachloroethane (TCE) as internal standard, <sup>c</sup>isolated yield, <sup>d</sup>2a (2 equiv.).

## 2. Reaction of 8-ethyl quinoline with N-methyl maleimide

### 2.1 Table S2. Optimization details

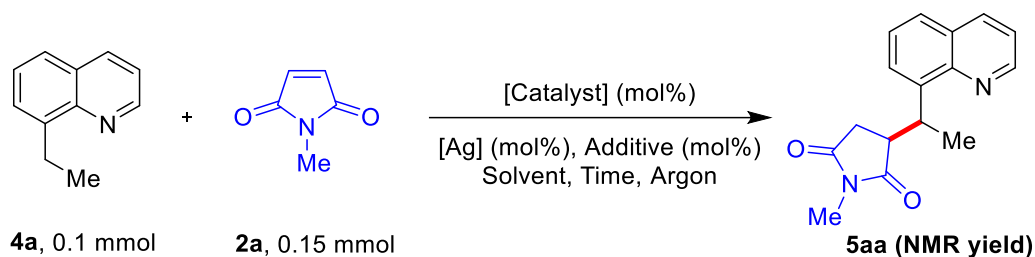

| Entry          | Catalyst (mol%)                    | [Ag] (mol%)       | Additive (mol%)    | Solvent     | Time       | Temp. (°C) | NMR Yield (%) <sup>b</sup> |
|----------------|------------------------------------|-------------------|--------------------|-------------|------------|------------|----------------------------|
| 1              | Cp*Co(CO)I <sub>2</sub> (5)        | AgOTf (10)        | AdCOOH (10)        | TFE         | 48h        | 100        | 33 (30) <sup>c</sup>       |
| 2              | <b>Cp*Co(CO)I<sub>2</sub> (10)</b> | <b>AgOTf (20)</b> | <b>AdCOOH (20)</b> | <b>TFE</b>  | <b>24h</b> | <b>100</b> | <b>48 (44)<sup>c</sup></b> |
| 3              | Cp*Co(CO)I <sub>2</sub> (10)       | AgOTf (20)        | AdCOOH (20)        | TFE         | 48h        | 100        | 45                         |
| 4              | Cp*Co(CO)I <sub>2</sub> (2.5)      | AgOTf (10)        | AdCOOH (10)        | TFE         | 24h        | 100        | <5                         |
| 5              | Cp*Co(CO)I <sub>2</sub> (10)       | AgOTf (20)        | AdCOOH (10)        | TFE         | 24h        | 100        | 42                         |
| 6              | Cp*Co(CO)I <sub>2</sub> (10)       | AgOTf (10)        | AdCOOH (20)        | TFE         | 24h        | 100        | <5                         |
| 7              | Cp*Co(CO)I <sub>2</sub> (10)       | AgOTf (20)        | AdCOOH (100)       | TFE         | 24h        | 100        | <5                         |
| 8              | Cp*Co(CO)I <sub>2</sub> (10)       | AgOTf (100)       | AdCOOH (20)        | TFE         | 24h        | 100        | <5                         |
| 9 <sup>d</sup> | Cp*Co(CO)I <sub>2</sub> (20)       | AgOTf (30)        | AdCOOH (30)        | TFE         | 24h        | 100        | 31                         |
| 10             | Cp*Co(CO)I <sub>2</sub> (10)       | AgOTf (40)        | AdCOOH (20)        | TFE         | 24h        | 100        | <5                         |
| 11             | Cp*Co(CO)I <sub>2</sub> (10)       | AgOTf (20)        | AdCOOH (20)        | HFIP        | 24h        | 100        | n.d.                       |
| 12             | Cp*Co(CO)I <sub>2</sub> (10)       | AgOTf (20)        | AdCOOH (20)        | DCE         | 24h        | 100        | <5                         |
| 13             | Cp*Co(CO)I <sub>2</sub> (10)       | AgOTf (20)        | AdCOOH (20)        | toluene     | 24h        | 100        | n.d.                       |
| 14             | Cp*Co(CO)I <sub>2</sub> (10)       | AgOTf (20)        | AdCOOH (20)        | 1,4 dioxane | 24h        | 100        | n.d.                       |
| 15             | Cp*Co(CO)I <sub>2</sub> (10)       | AgOTf (20)        | AdCOOH (20)        | DMF         | 24 h       | 100        | n.d.                       |
| 16             | Cp*Co(CO)I <sub>2</sub> (10)       | AgOTf (20)        | AdCOOH (20)        | DME         | 24h        | 100        | n.d.                       |
| 17             | Cp*Co(CO)I <sub>2</sub> (10)       | AgOTf (20)        | NaOPiv (20)        | TFE         | 24h        | 100        | >5                         |
| 18             | Cp*Co(CO)I <sub>2</sub> (10)       | AgOTf (20)        | AcOH (20)          | TFE         | 24h        | 100        | 15                         |

<sup>a</sup>reaction conditions: 1a (0.1 mmol), 2a (0.15 mmol), solvent (0.5 ml), under argon. <sup>b</sup>NMR yield of crude reaction mixture was calculated by using tetrachloroethane (TCE) as internal standard, <sup>c</sup>isolated yield, <sup>d</sup>2a (2 equiv.).

### 3. Mechanistic study

#### 3.1 Scheme S1. Deuterium labeling experiments

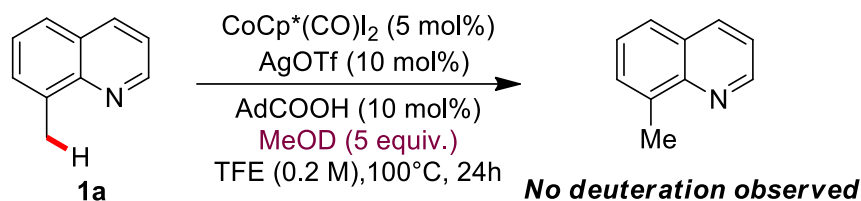

To an oven-dried screw cap reaction vial charged with a spin vane magnetic stir-bar,  $[\text{Cp}^*\text{Co}(\text{CO})\text{I}_2]$  (5 mol%),  $\text{AgOTf}$  (10 mol%),  $\text{AdCOOH}$  (10 mol%) were added under argon atmosphere followed by addition of 8-methyl quinoline (0.1 mmol),  $\text{CD}_3\text{OD}$  (5 equiv.), and 2,2,2-Trifluoroethanol (0.5 mL) subsequent reaction mixture was stir at  $100^\circ\text{C}$  for 24 h. The solvent was evaporated under reduced pressure and the crude mixture was purified by flash chromatography using silica gel (230-400 mesh size) and *n*-hexane: EtOAc as eluent. No deuteration was observed in the  $^1\text{H}$  NMR analysis.

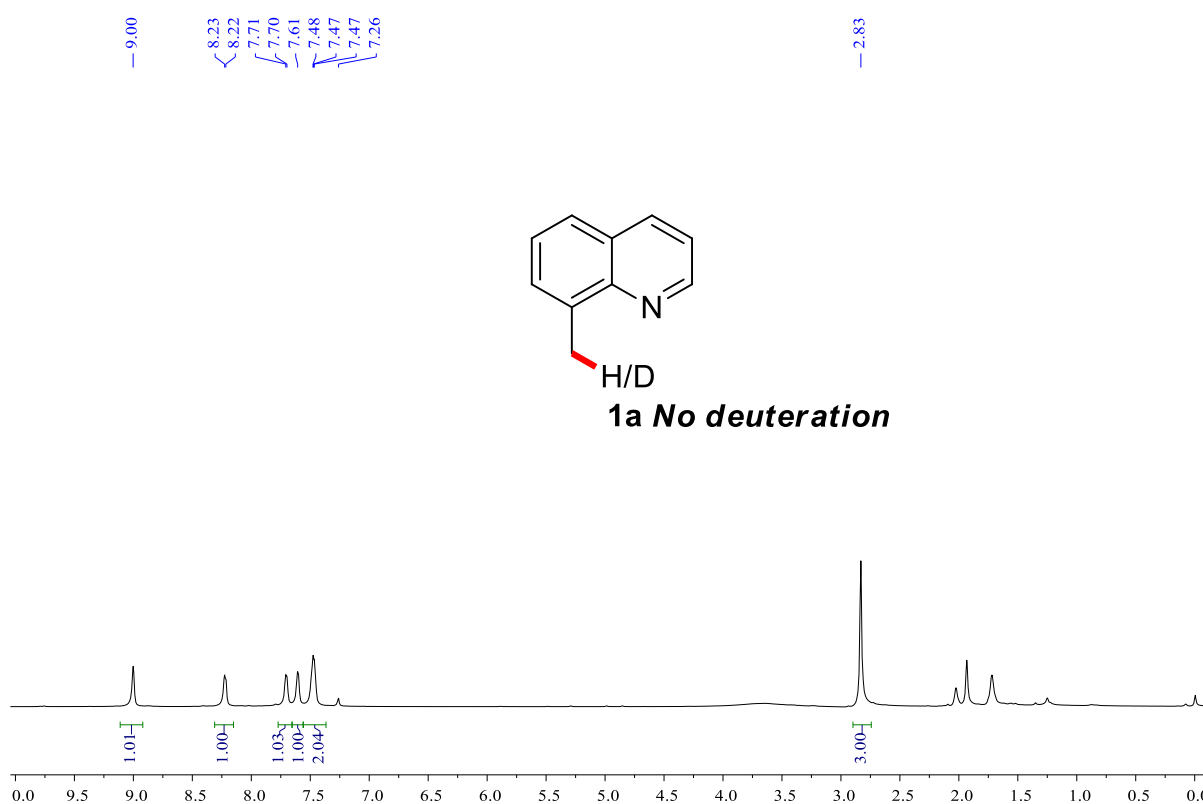



### 3.2 Scheme S2. Deuterium lebling experiments

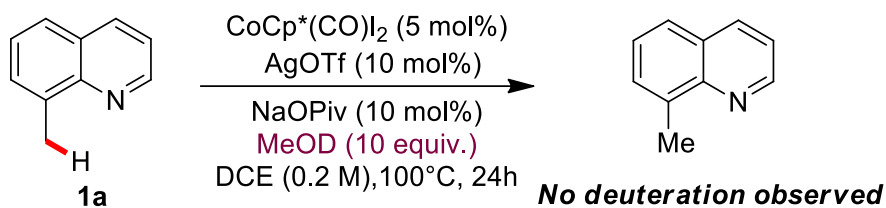

To an oven-dried screw cap reaction vial charged with a spin vane magnetic stir-bar, [Cp\*Co(CO)I<sub>2</sub>] (5 mol%), AgOTf (10 mol%), NaOPiv (10 mol%) were added under argon atmosphere followed by addition of 8-methyl quinoline (0.1 mmol), CD<sub>3</sub>OD (10 equiv.), and DCE (0.5 mL) subsequent reaction mixture was stir at 100 °C for 24 h. Solvent was evaporated under reduced pressure and the crude mixture was purified by flash chromatography using silica gel (230-400 mesh size) and *n*-hexane: EtOAc as eluent. No deuteration was observed in the <sup>1</sup>H NMR analysis.

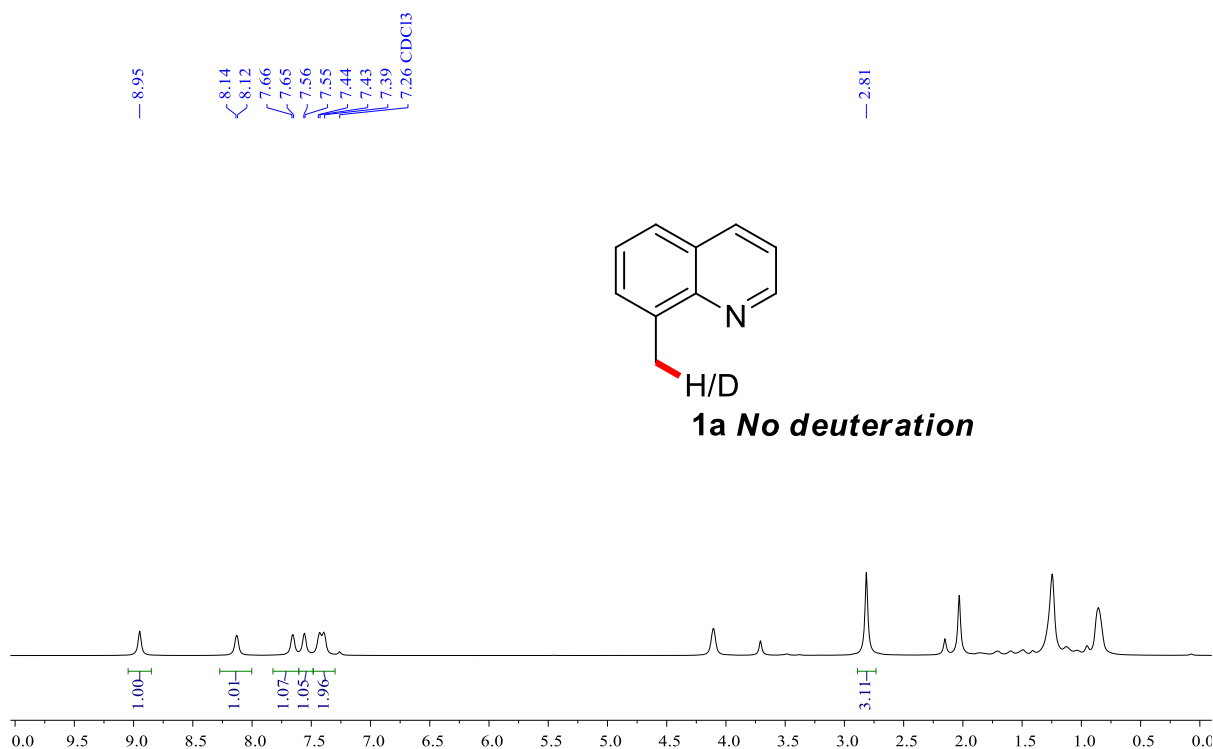

### 3.3 Scheme S3. Deuterium labeling experiments

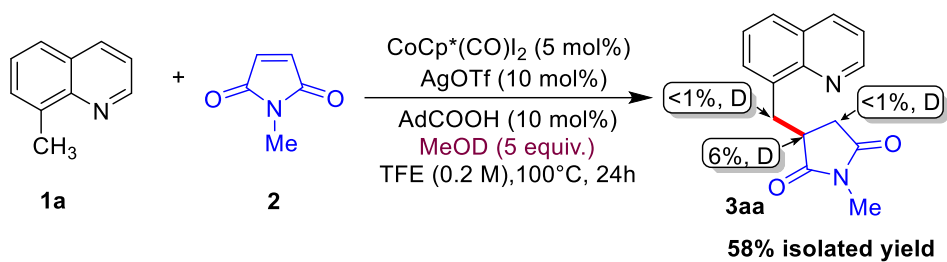

To an oven-dried screw cap reaction vial charged with a spin vane magnetic stir-bar, *N*-methyl maleimide (0.3 mmol),  $[\text{Cp}^*\text{Co}(\text{CO})\text{I}_2]$  (5 mol%),  $\text{AgOTf}$  (10 mol%),  $\text{AdCOOH}$  (10 mol%) were added under argon atmosphere followed by addition of 8-methyl quinoline (0.2 mmol),  $\text{CD}_3\text{OD}$  (5 equiv.), and 2,2,2-Trifluoroethanol (1.0 mL) subsequent reaction mixture was stirred at  $100^\circ\text{C}$  for 24 h. The solvent was evaporated under reduced pressure and the crude mixture was purified by flash chromatography using silica gel (230-400 mesh size) and *n*-hexane:  $\text{EtOAc}$  as eluent. No deuteration was observed in the  $^1\text{H}$  NMR analysis.

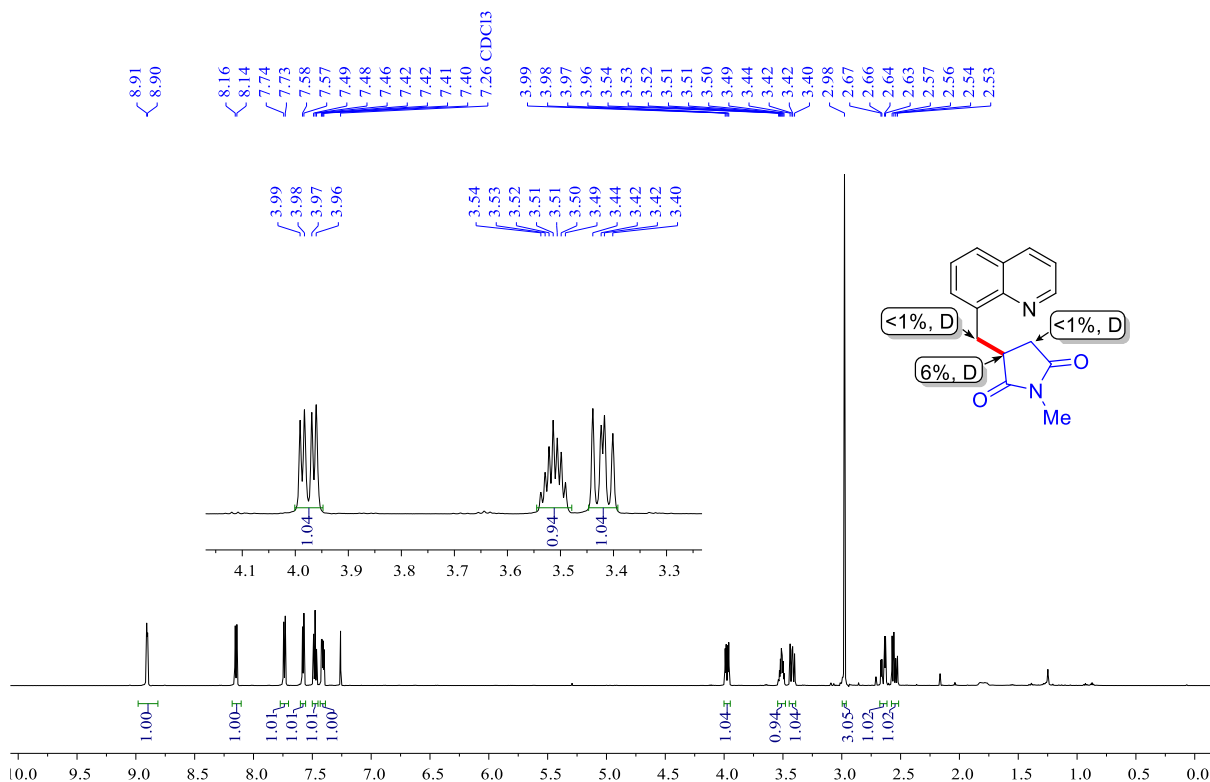

### 3.4 Scheme S4. Synthesis of **1a-D<sub>3</sub>**

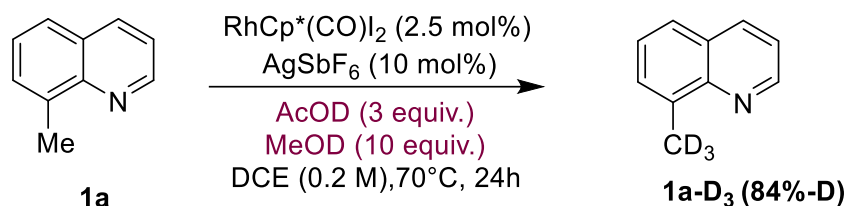

To an oven-dried screw cap reaction vial charged with a spin vane magnetic stir-bar, 8-methylquinoline (**1a**) (0.2 mmol),  $[\text{RhCp}^*\text{Cl}_2]_2$  (2.5 mol %),  $\text{AcOD}$  (3 equiv.) and  $\text{MeOD}$  (20.0 equiv.) and  $\text{AgSbF}_6$  (10 mol %) were added in  $\text{DCE}$  (1 mL) under air at room temperature subsequent reaction mixture was stir at  $70^\circ\text{C}$  for 24 h. The solvent was evaporated under reduced pressure and the crude mixture was purified by flash chromatography using silica gel (230-400 mesh size) and n-hexane: EtOAc as eluent.

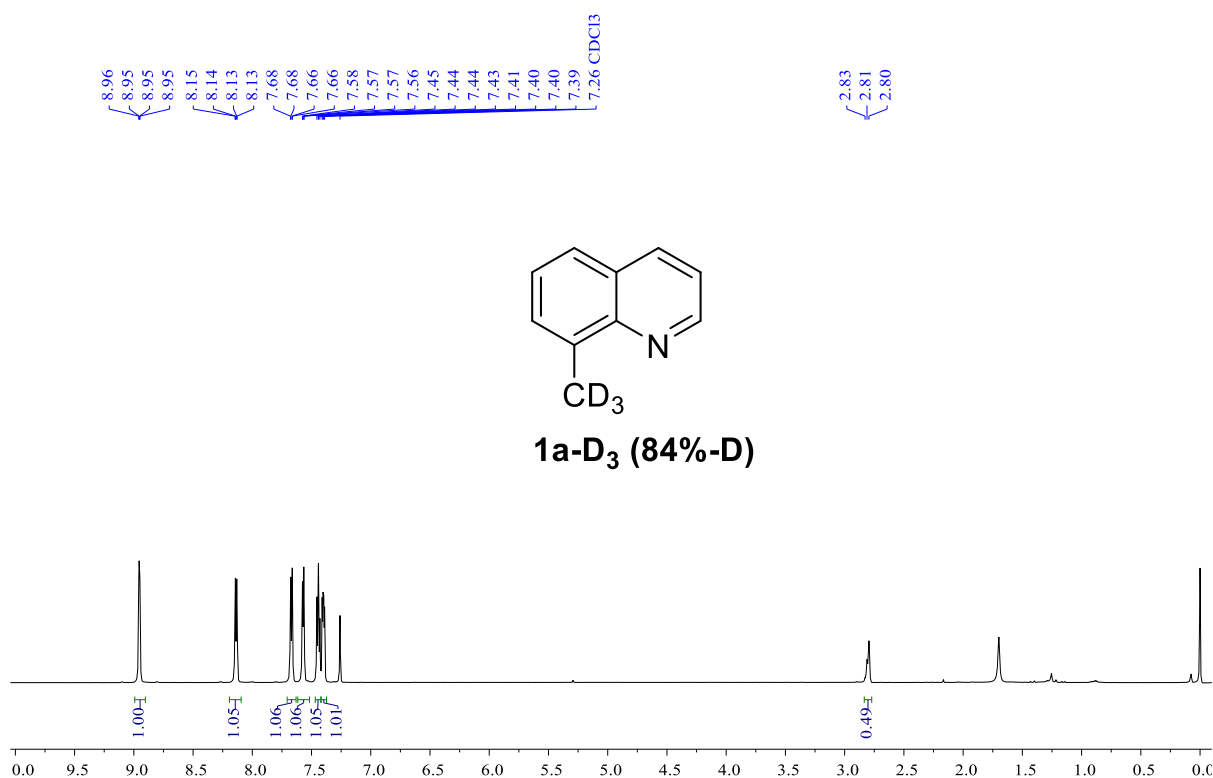

### 3.5 Scheme S5. Deuterium labeling experiment

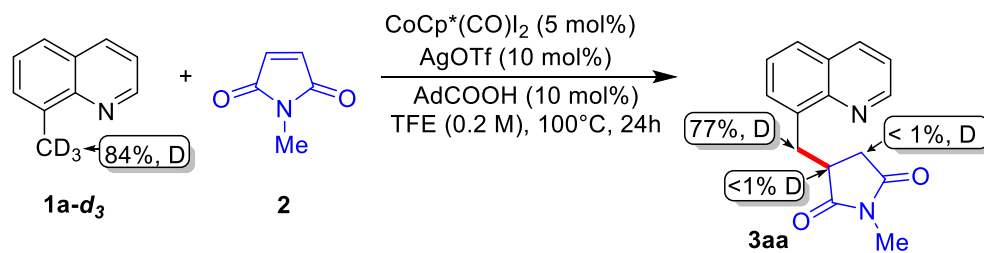

To an oven-dried screw cap reaction vial charged with a spin vane magnetic stir-bar, *N*-methyl maleimide (0.3 mmol), [Cp\*Co(CO)<sub>2</sub>] (5 mol%), AgOTf (10 mol%), AdCOOH (10 mol%) were added under argon atmosphere followed by addition of 8-methyl quinoline-D<sub>3</sub> (0.2 mmol), and 2,2,2-Trifluoroethanol (1.0 mL) subsequent reaction mixture was stir at 100 °C for 24 h. The solvent was evaporated under reduced pressure and the crude mixture was purified by flash chromatography using silica gel (230-400 mesh size) and *n*-hexane: EtOAc as eluent. No deuterium exchange was observed in the <sup>1</sup>H NMR analysis.

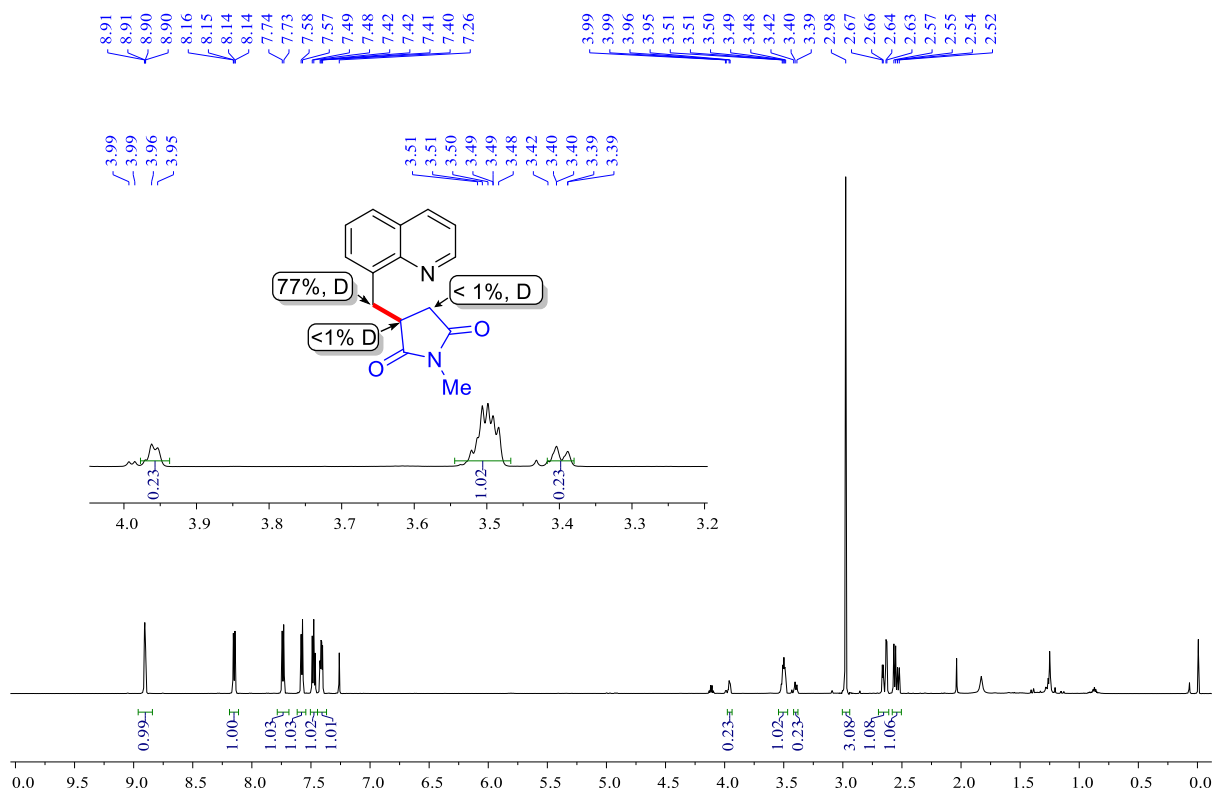

### 3.6 Scheme S6. Competition experiment Kinetic isotopic effect

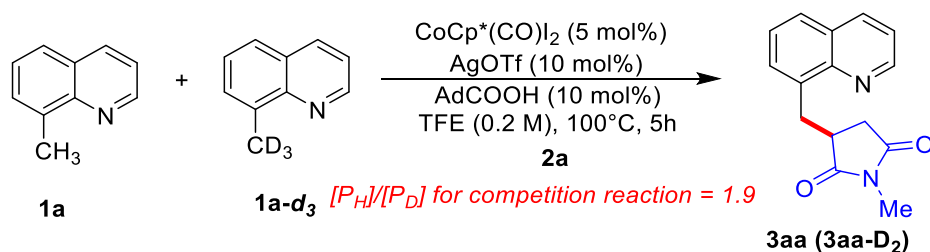

To an oven-dried screw cap reaction vial charged with a spin vane magnetic stir-bar, *N*-methyl maleimide (0.3 mmol),  $[\text{Cp}^*\text{Co}(\text{CO})\text{I}_2]$  (5 mol%), AgOTf (10 mol%), AdCOOH (10 mol%) were added under argon atmosphere followed by addition of 8-methyl quinoline (0.1 mmol), 8-methyl quinoline- $\text{D}_3$  (0.1 mmol), and 2,2,2-Trifluoroethanol (1.0 mL) subsequent reaction mixture was stir at 100  $^\circ\text{C}$  for 24 h. The solvent was evaporated under reduced pressure and the crude mixture was purified by flash chromatography using silica gel (230-400 mesh size) and *n*-hexane: EtOAc as eluent. The kinetic isotopic effect value ( $k_H/k_D$ ) was calculated from  $^1\text{H}$  NMR analysis and found 1.9.

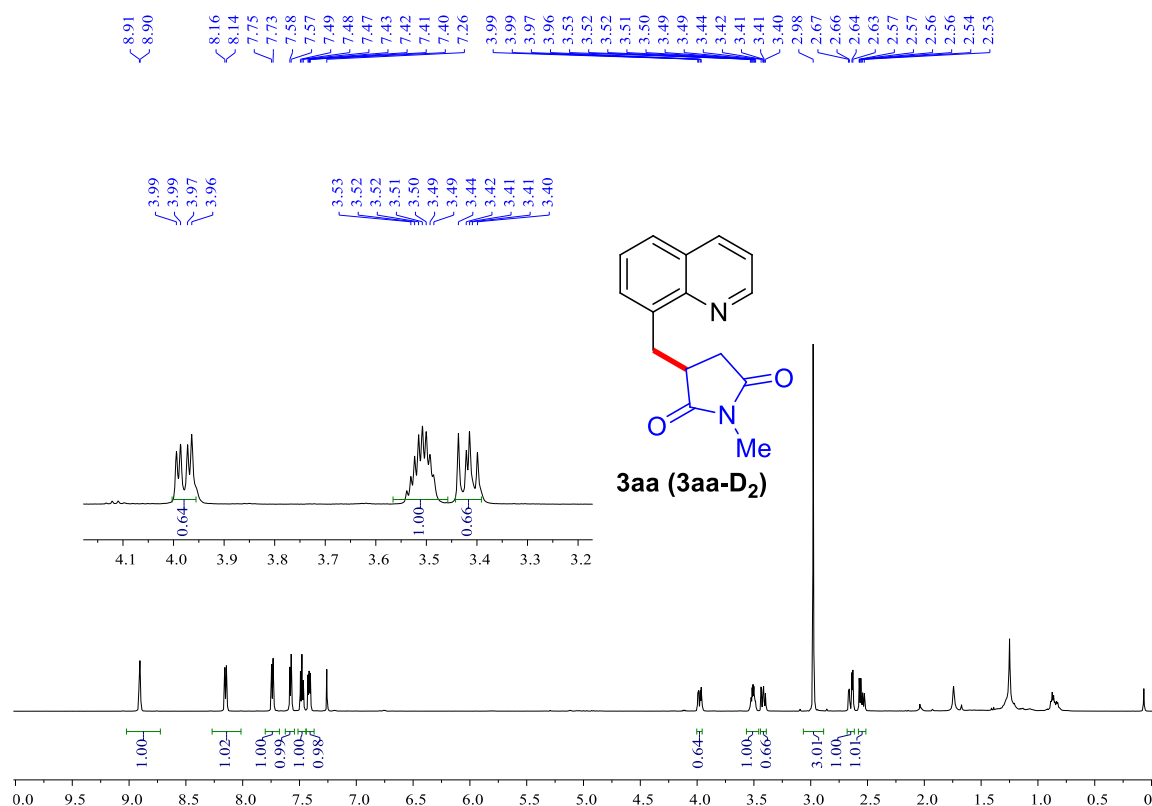

### 3.7 Scheme S7. Parallel experiment Kinetic isotopic effect

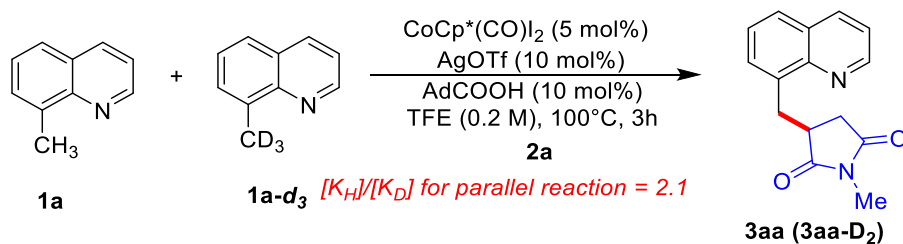

To an oven-dried screw cap reaction vial charged with a spin vane magnetic stir-bar, *N*-methyl maleimide (0.15 mmol), [Cp\*Co(CO)I<sub>2</sub>] (5 mol%), AgOTf (10 mol%), AdCOOH (10 mol%) were added under argon atmosphere followed by addition of 8-methyl quinoline (0.1 mmol), and 2,2,2-Trifluoroethanol (1.0 mL). In another reaction tube 8-methyl quinoline-*d*<sub>3</sub> (0.1 mmol) was used instead of 8-methyl quinoline. The two-reaction mixtures were allowed to stir at 100 °C for 3h. Both reaction mixtures were analysed through <sup>1</sup>H NMR using TCE as an internal standard and the calculated NMR yields of products **3aa** and **3aa-D<sub>2</sub>** was 74% and 35% respectively. The kinetic isotope effect value (*k*<sub>H</sub>/*k*<sub>D</sub>) was found 2.1.

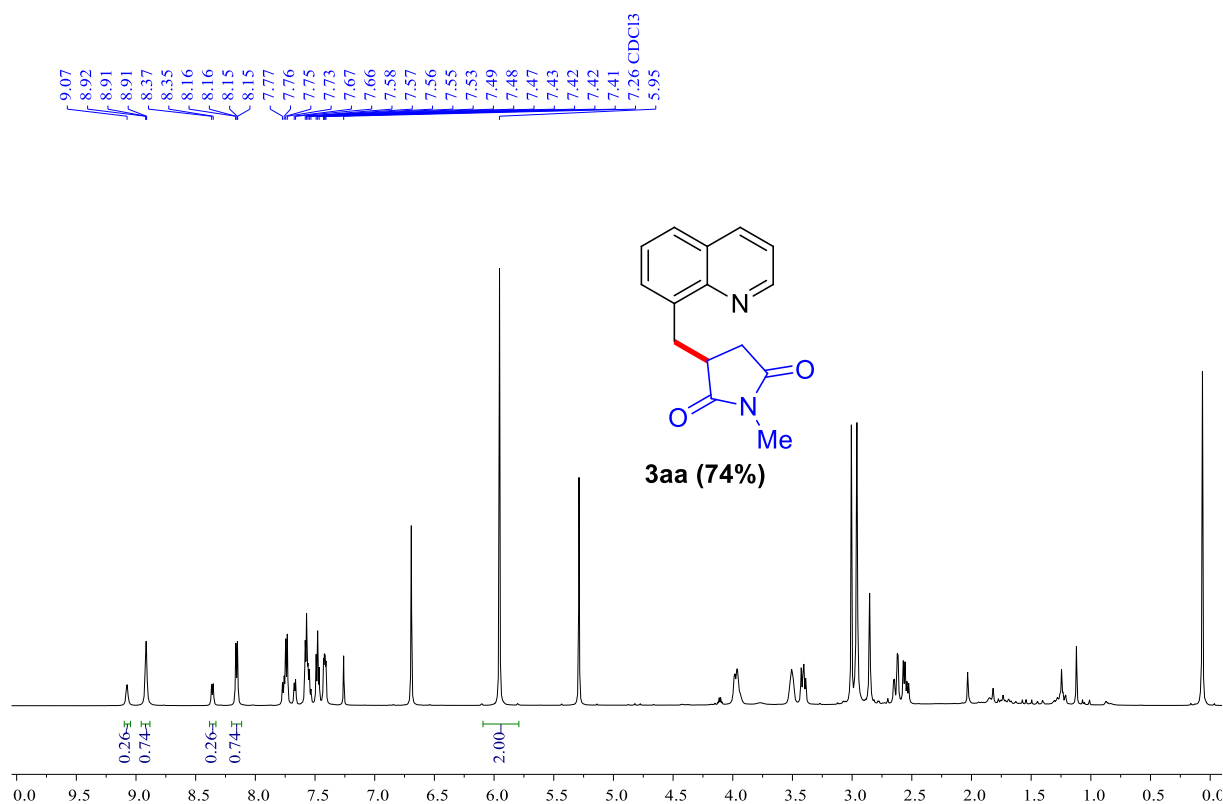

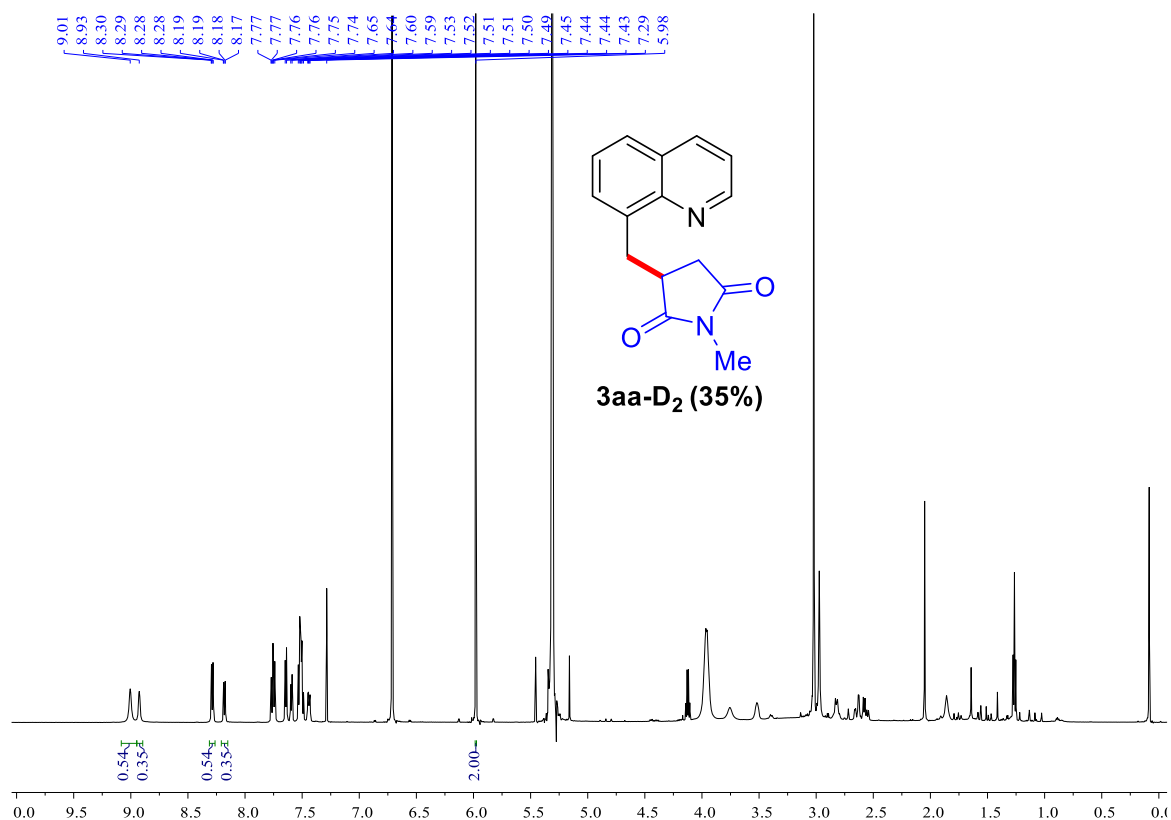

#### 4. $^1\text{H}$ and $^{13}\text{C}$ Spectral Data

*1-Methyl-3-((3-methylquinolin-8-yl)methyl)pyrrolidine-2,5-dione* (Table 2, entry 3ba):

##### $^1\text{H}$ NMR

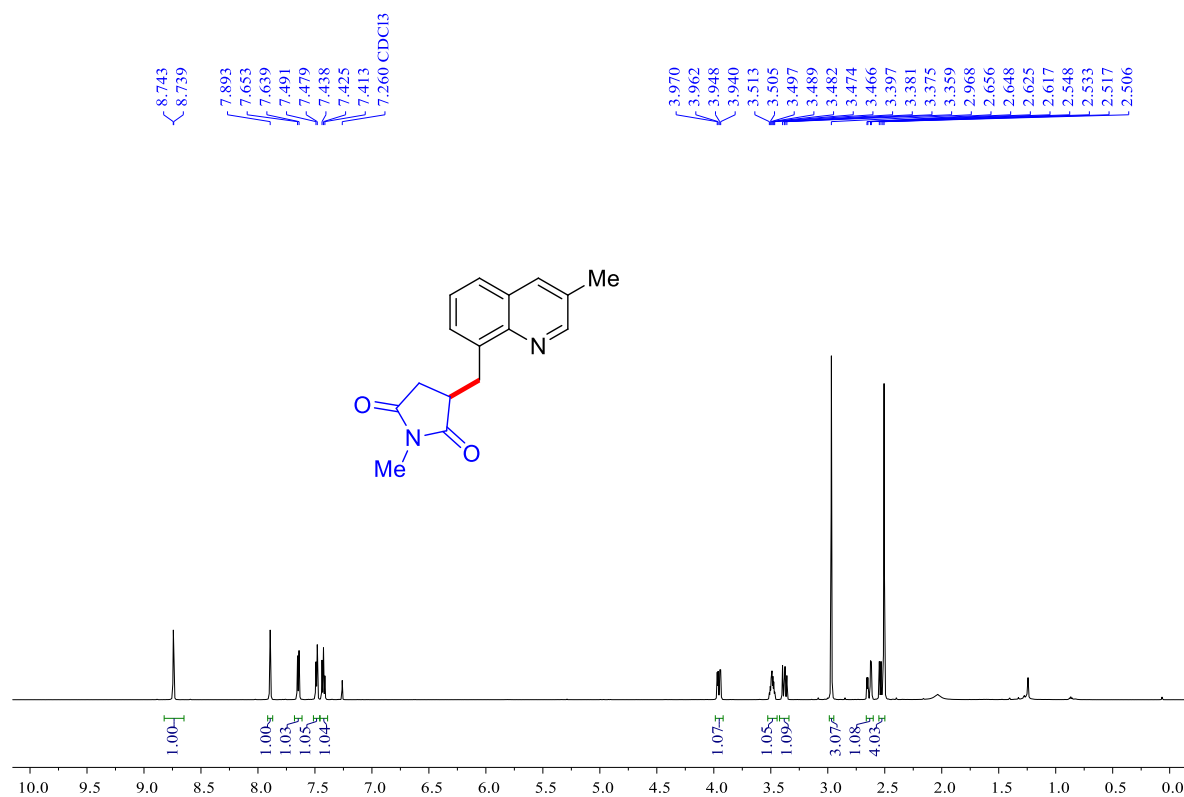

##### $^{13}\text{C}$ NMR

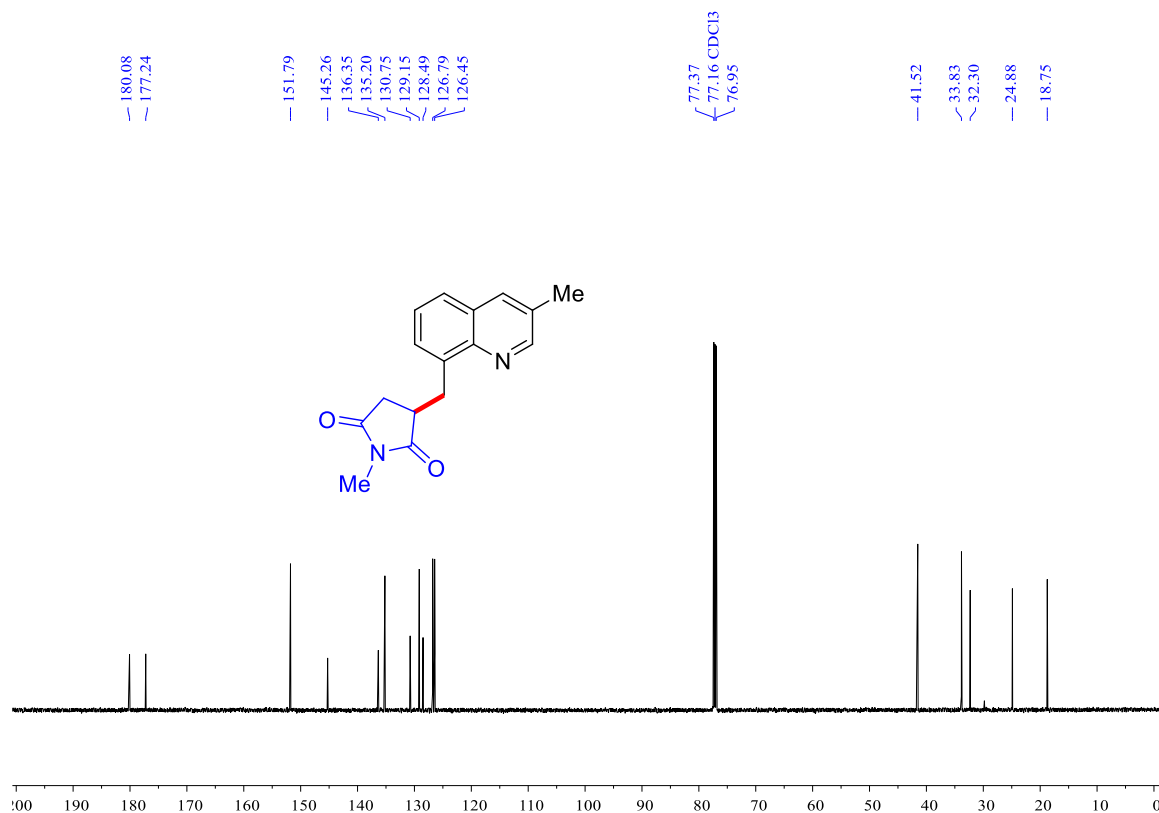



**1-Methyl-3-((4-methylquinolin-8-yl)methyl)pyrrolidine-2,5-dione (Table 2, entry 3ca):**

**<sup>1</sup>H NMR**

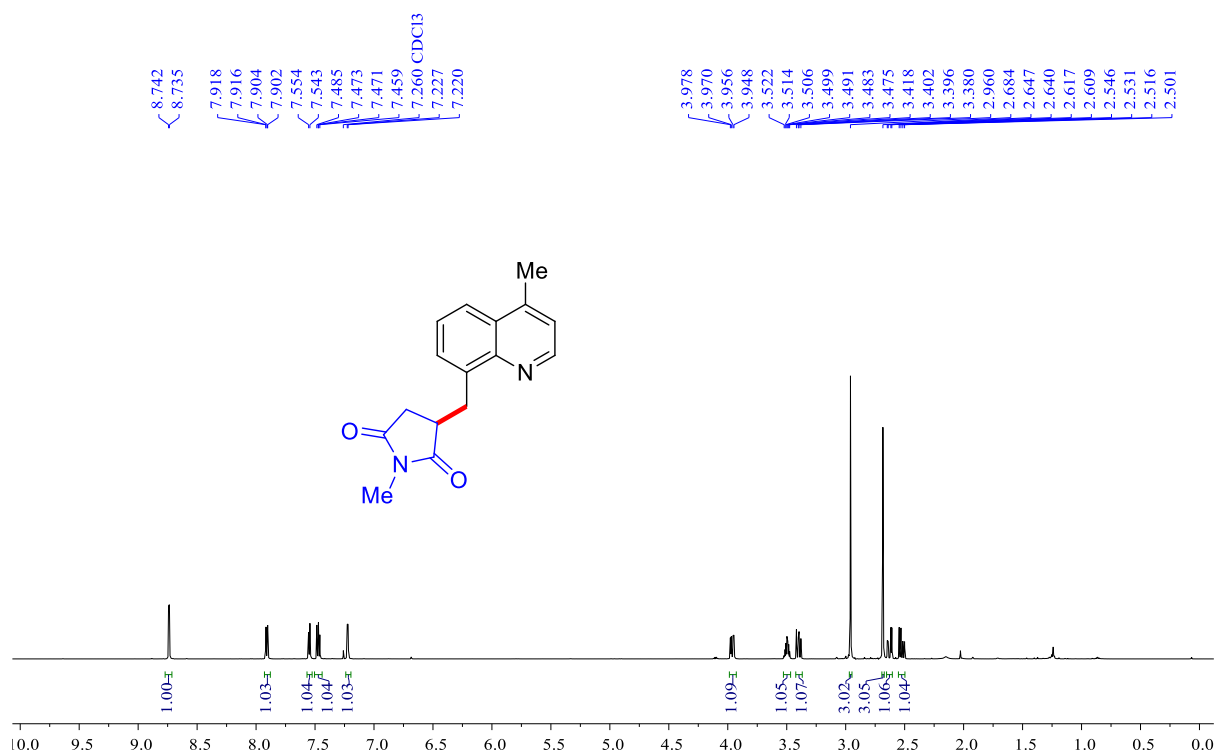

**<sup>13</sup>C NMR**

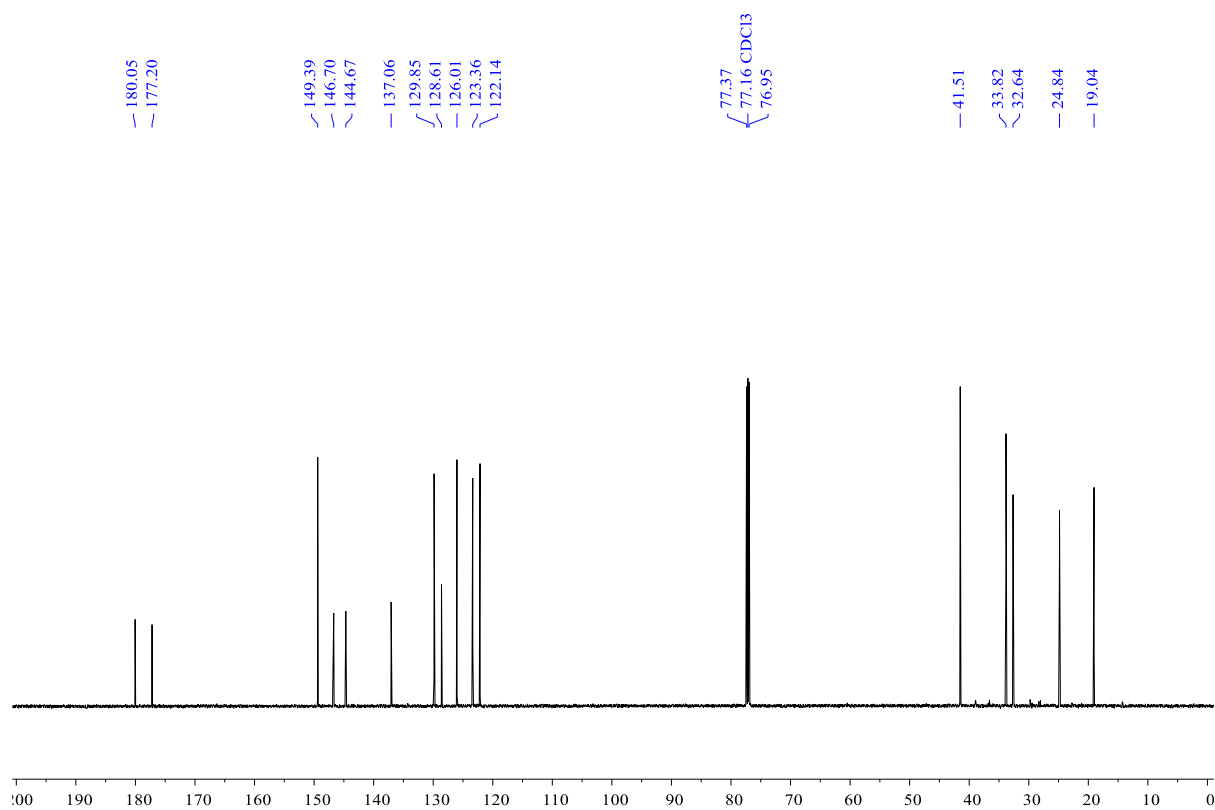

**1-Methyl-3-((5-methylquinolin-8-yl)methyl)pyrrolidine-2,5-dione (Table 2, entry 3da):**

**<sup>1</sup>H NMR**

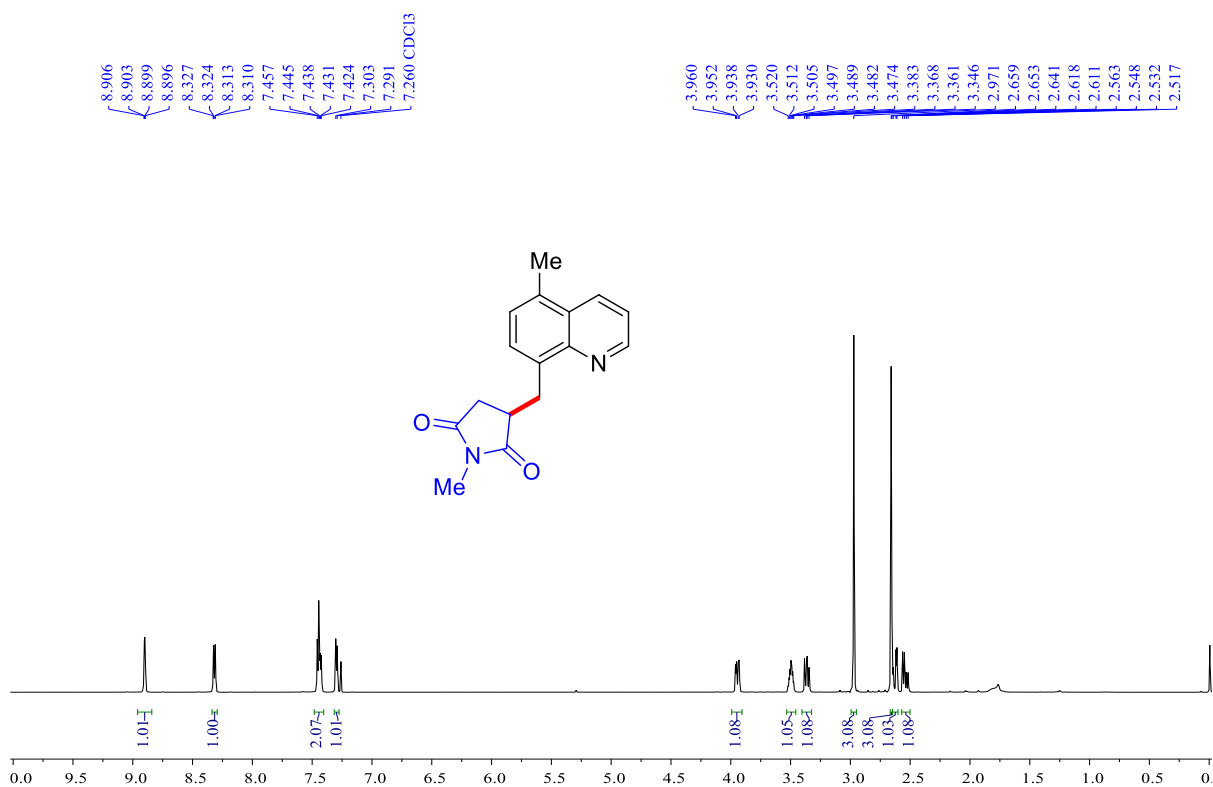

**<sup>13</sup>C NMR**

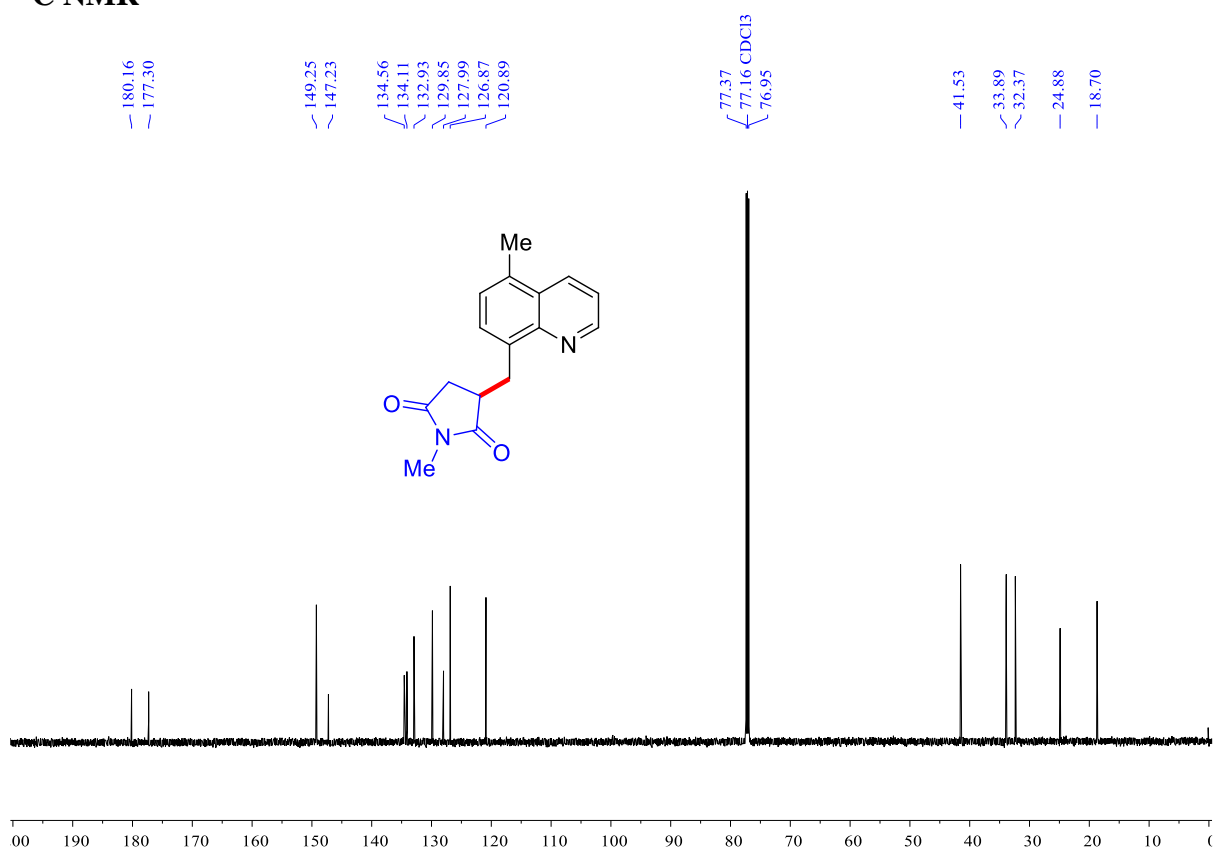

**1-Methyl-3-((6-methylquinolin-8-yl)methyl)pyrrolidine-2,5-dione (Table 2, entry 3ea):**

**<sup>1</sup>H NMR**

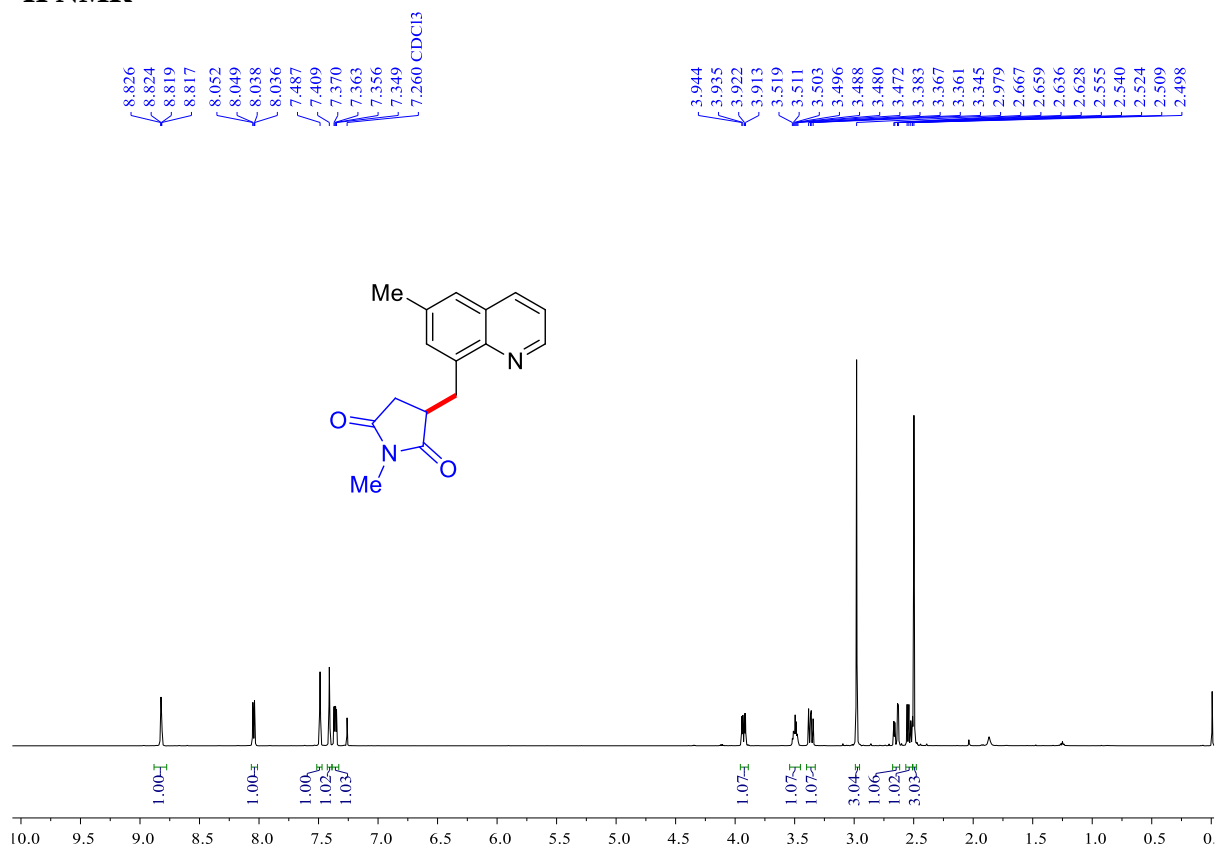

**<sup>13</sup>C NMR**

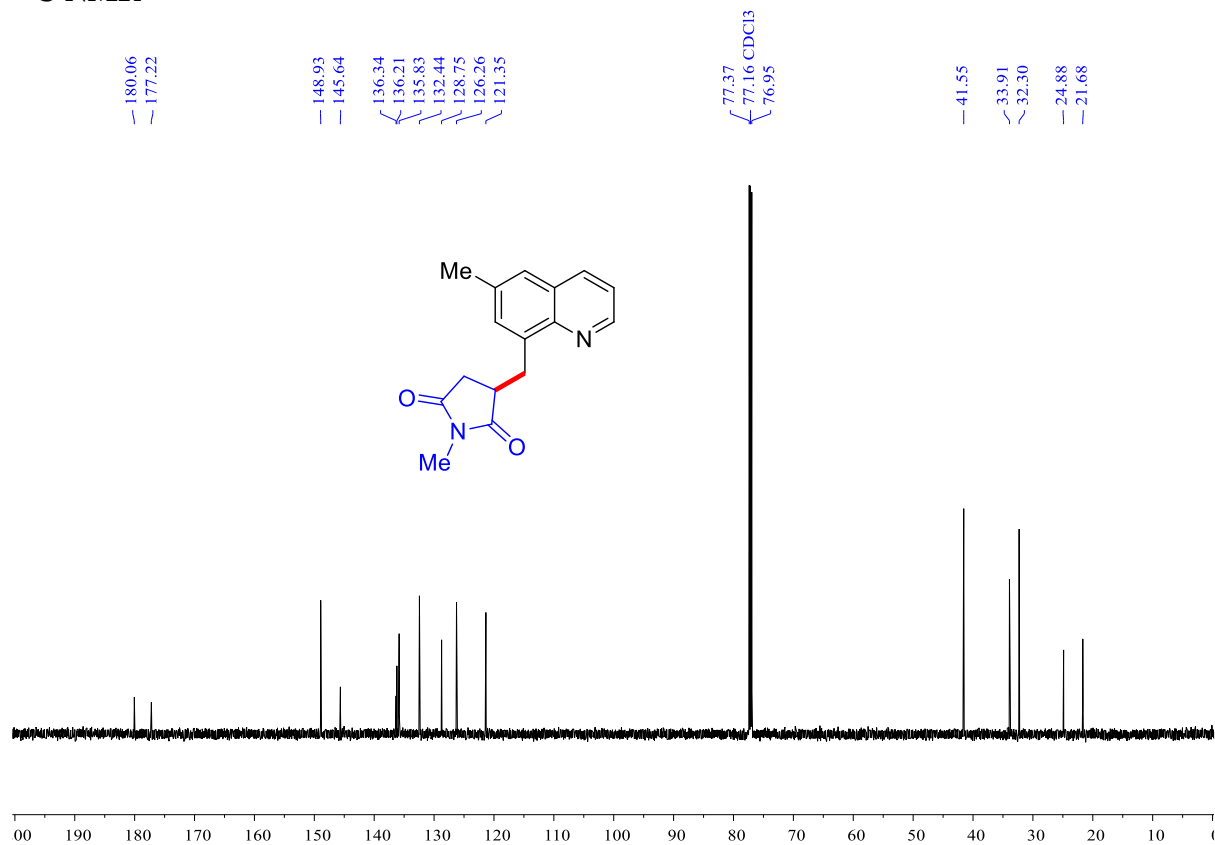

**1-Methyl-3-((7-methylquinolin-8-yl)methyl)pyrrolidine-2,5-dione (Table 2, entry 3fa):**

**<sup>1</sup>H NMR**

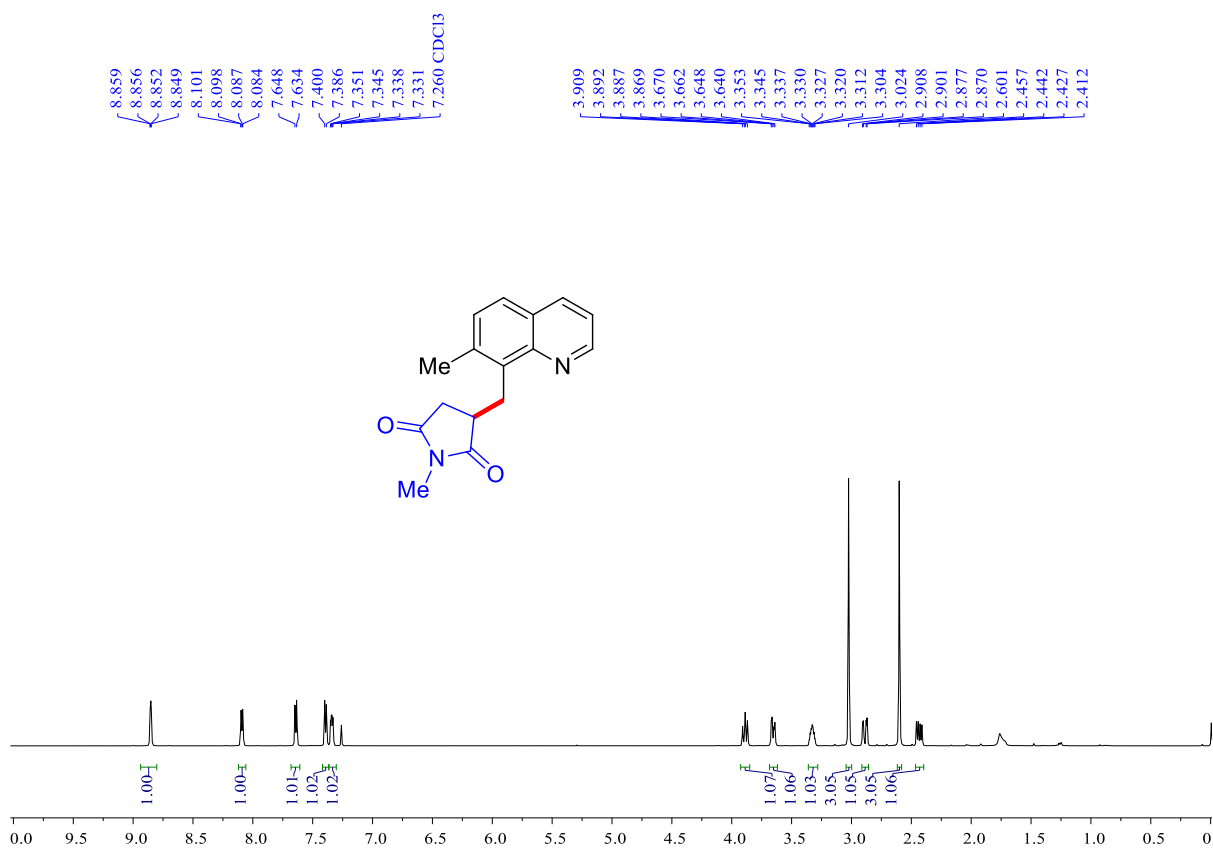

**<sup>13</sup>C NMR**

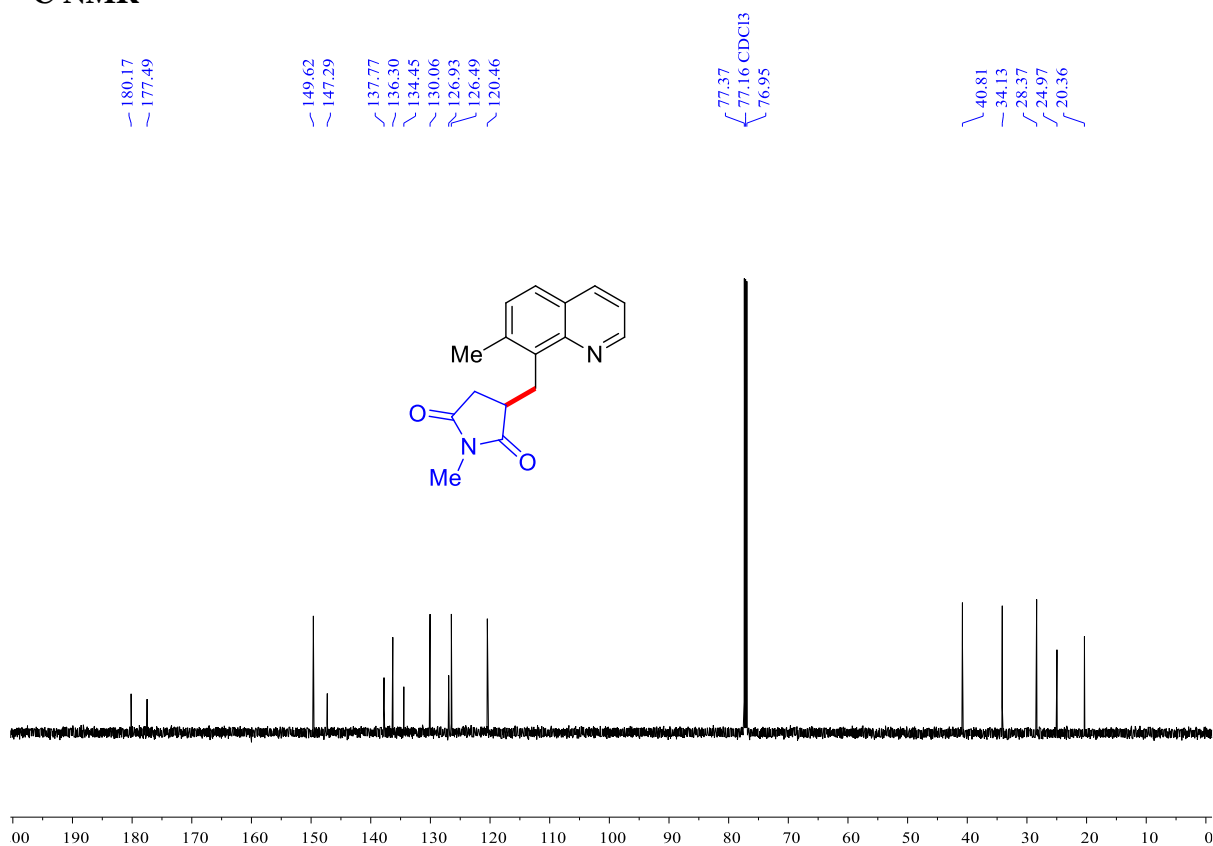

**3-((4-Chloroquinolin-8-yl)methyl)-1-methylpyrrolidine-2,5-dione (Table 2, entry 3ga):**

**<sup>1</sup>H NMR**

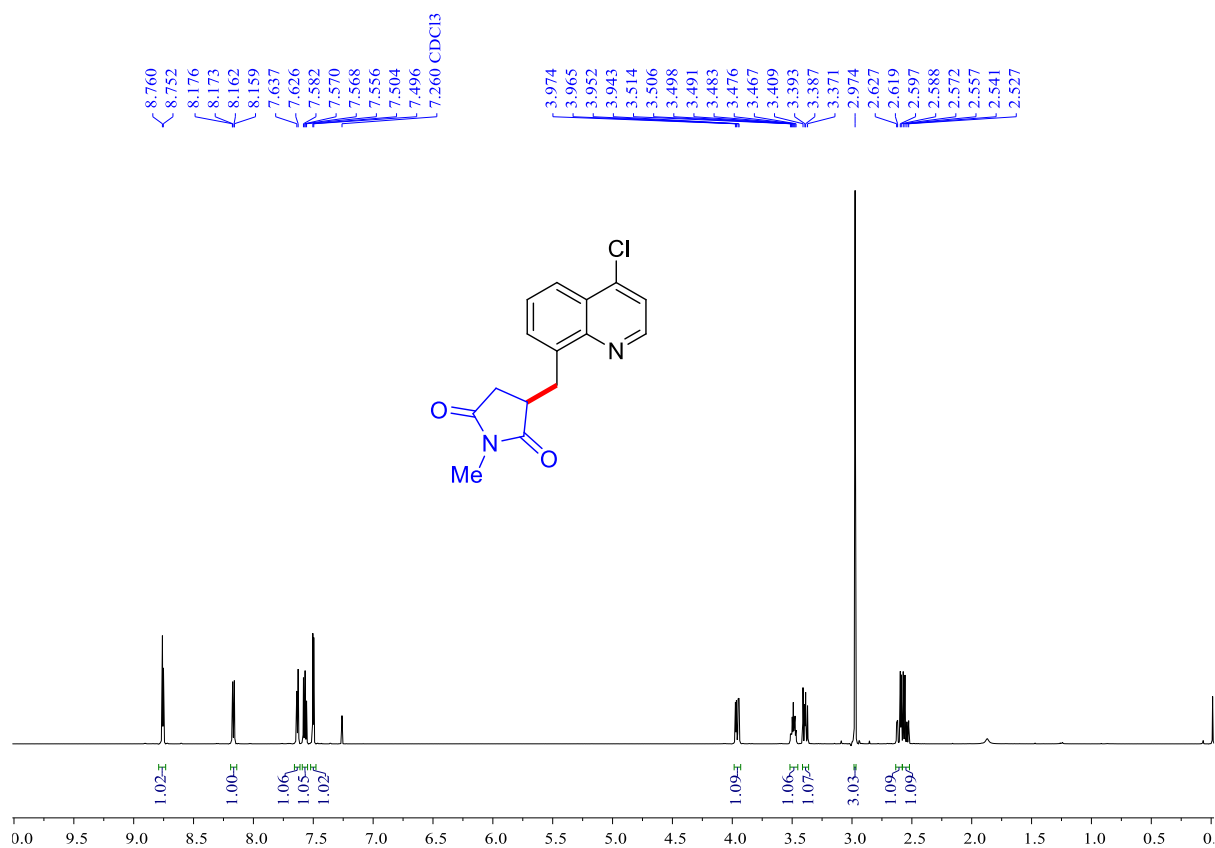

**<sup>13</sup>C NMR**

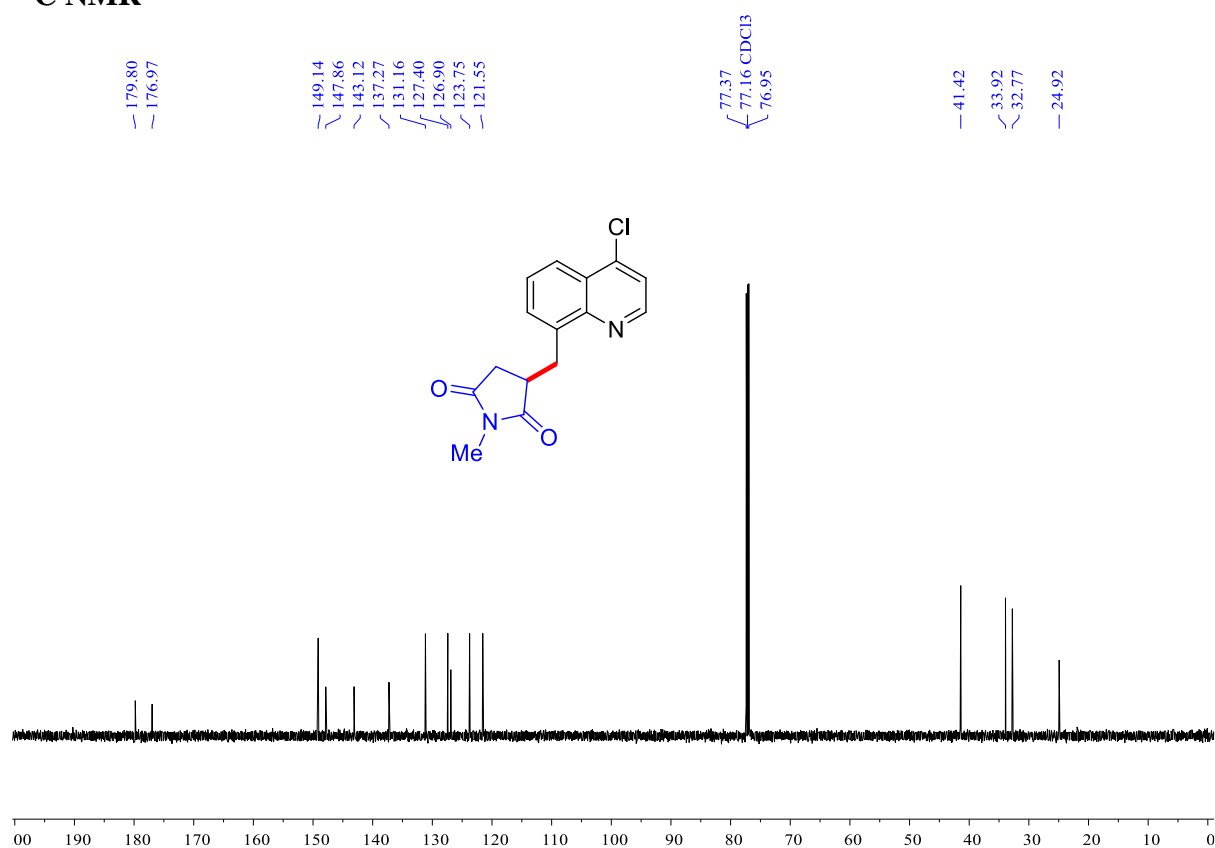

**3-((4,6-Dichloroquinolin-8-yl)methyl)-1-methylpyrrolidine-2,5-dione (Table 2, entry ha):**

**<sup>1</sup>H NMR**

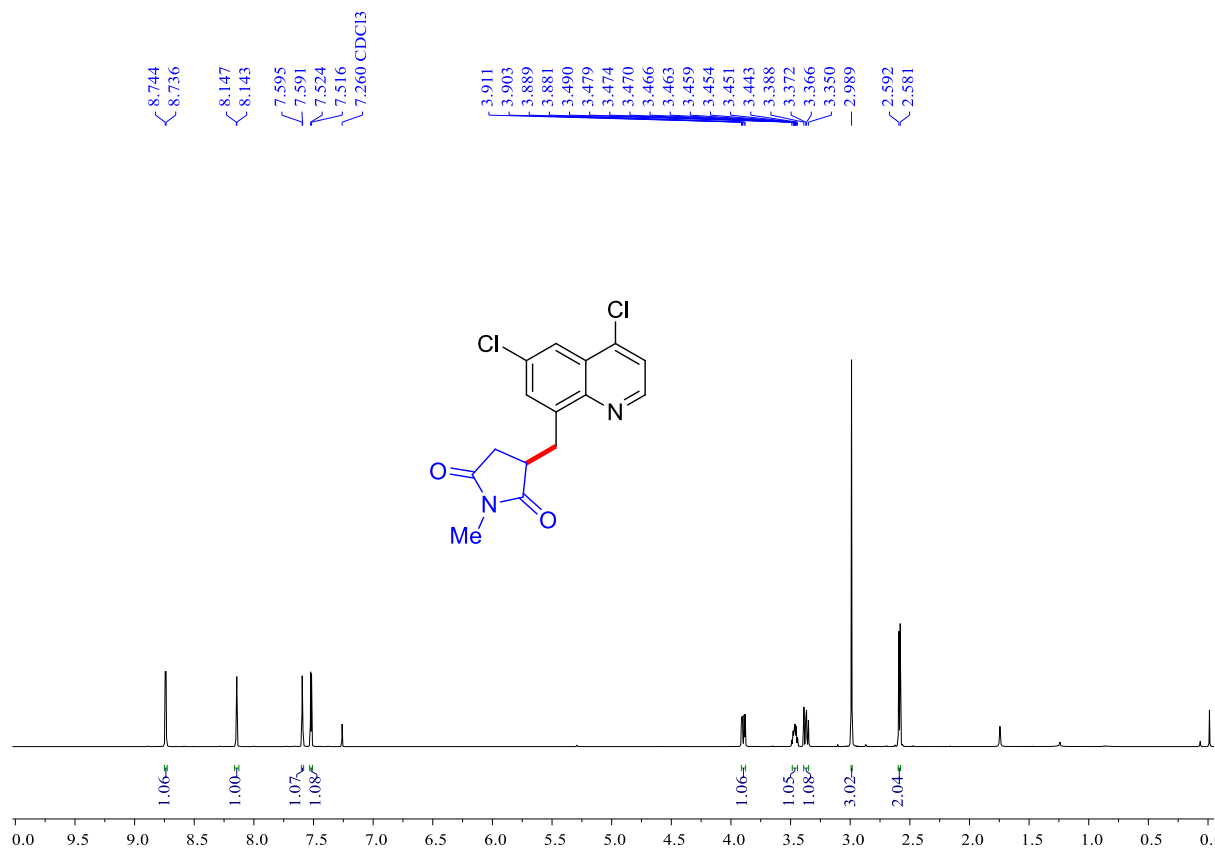

**<sup>13</sup>C NMR**

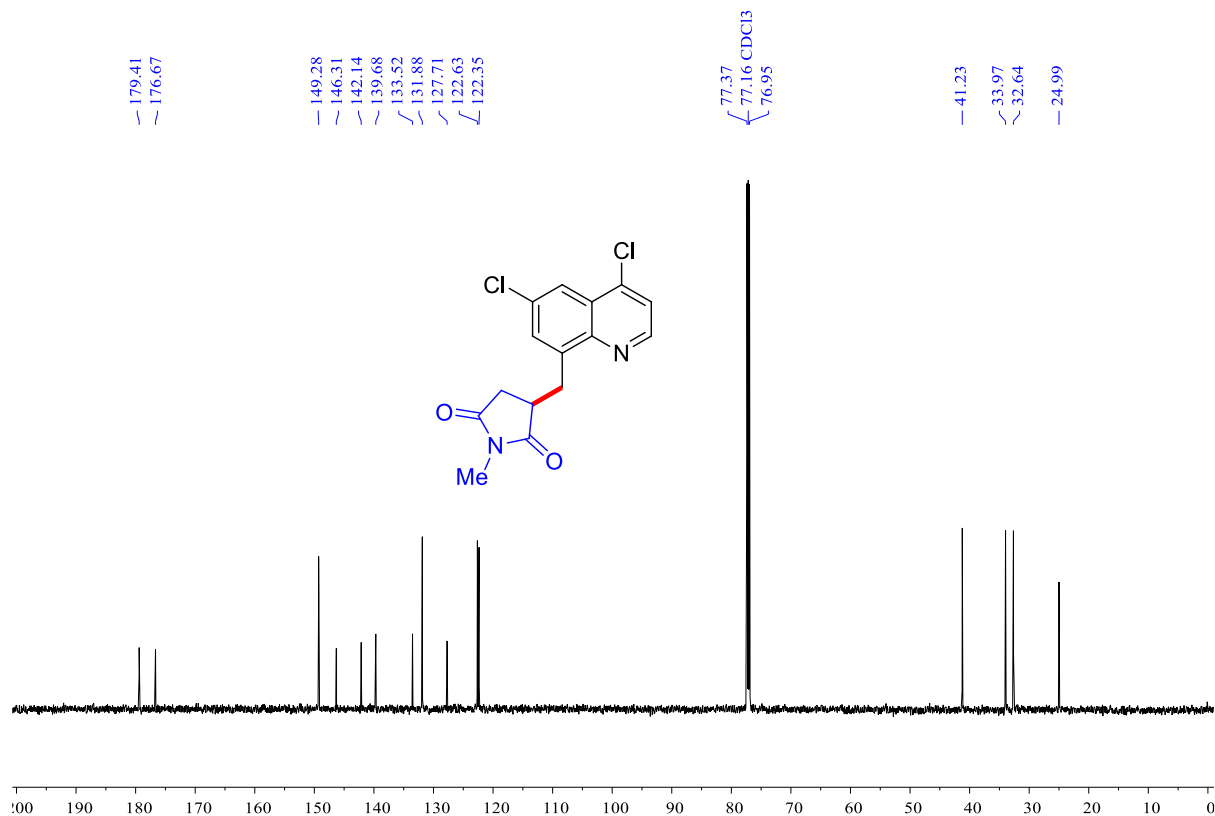

**3-((7-Chloroquinolin-8-yl)methyl)-1-methylpyrrolidine-2,5-dione (Table 2, entry ia):**

**<sup>1</sup>H NMR**

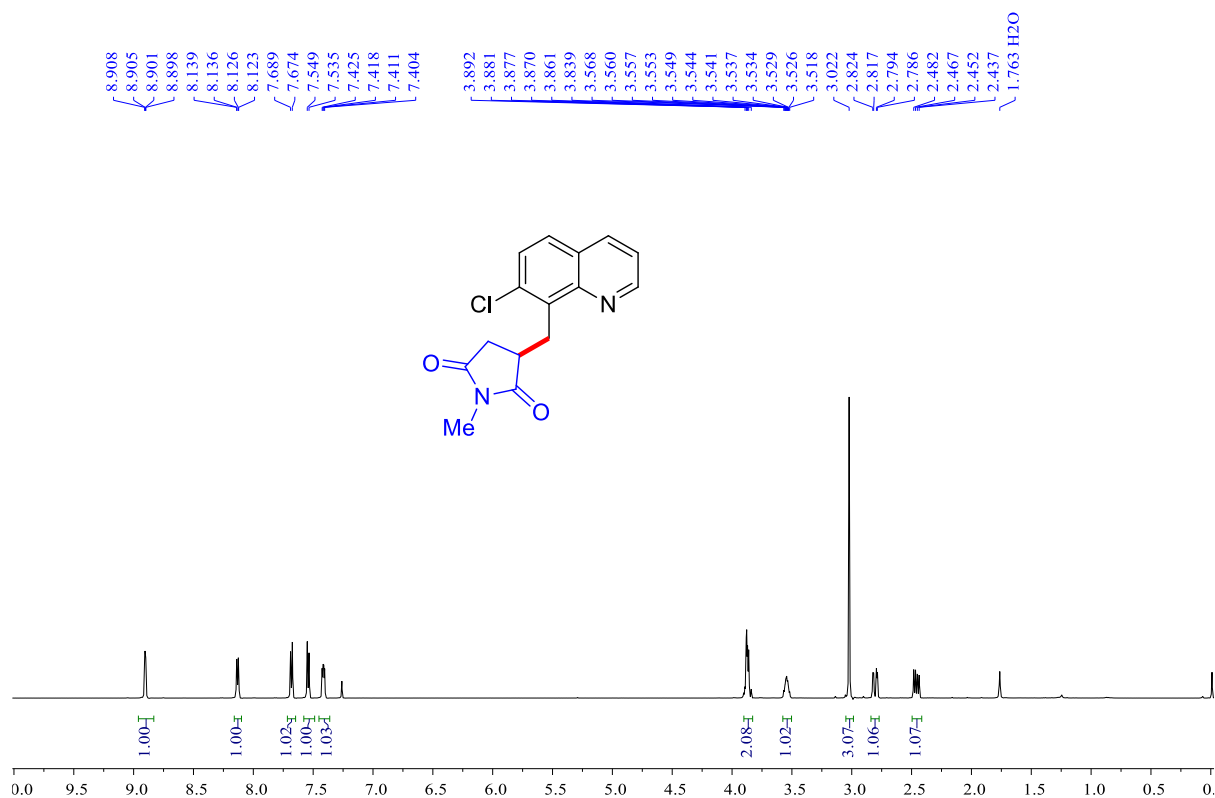

**<sup>13</sup>C NMR**

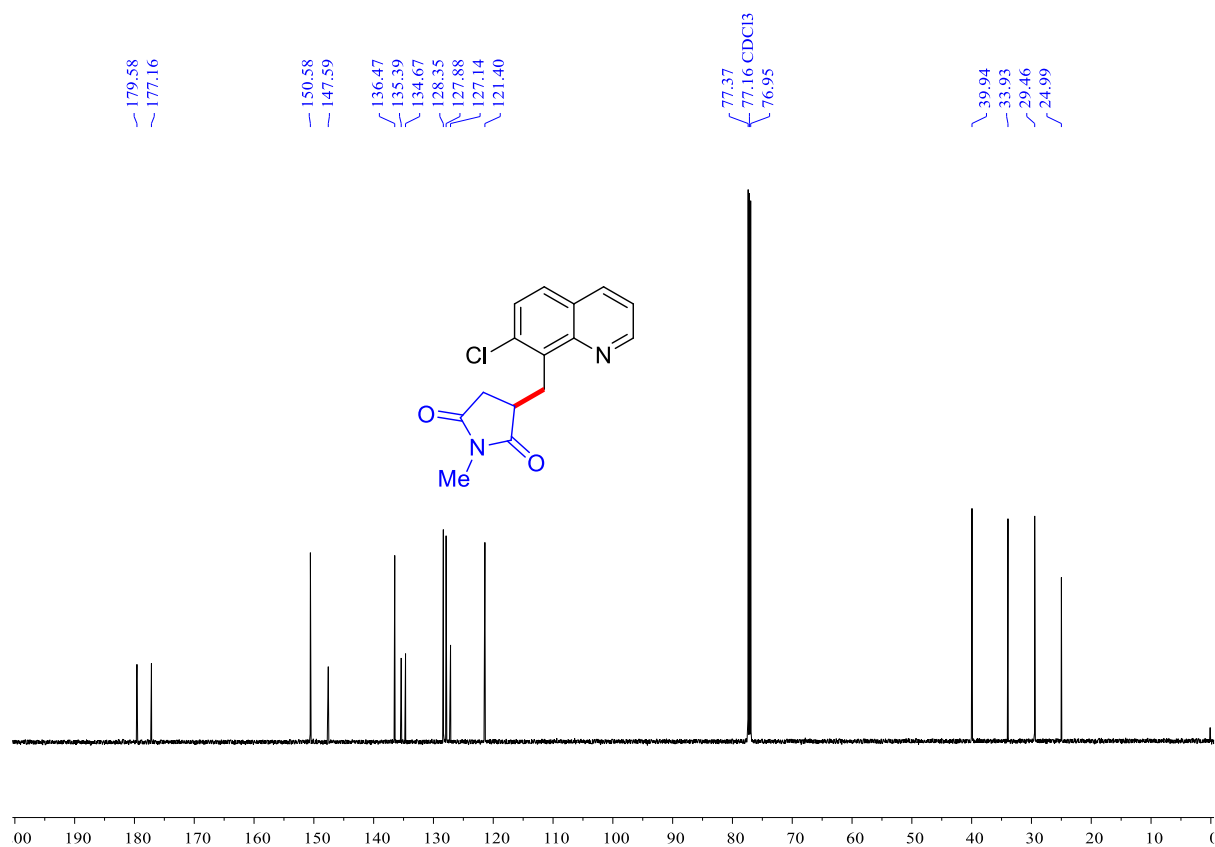

**3-((3-Bromoquinolin-8-yl)methyl)-1-methylpyrrolidine-2,5-dione (Table 2, entry 3ja):**

**<sup>1</sup>H NMR**

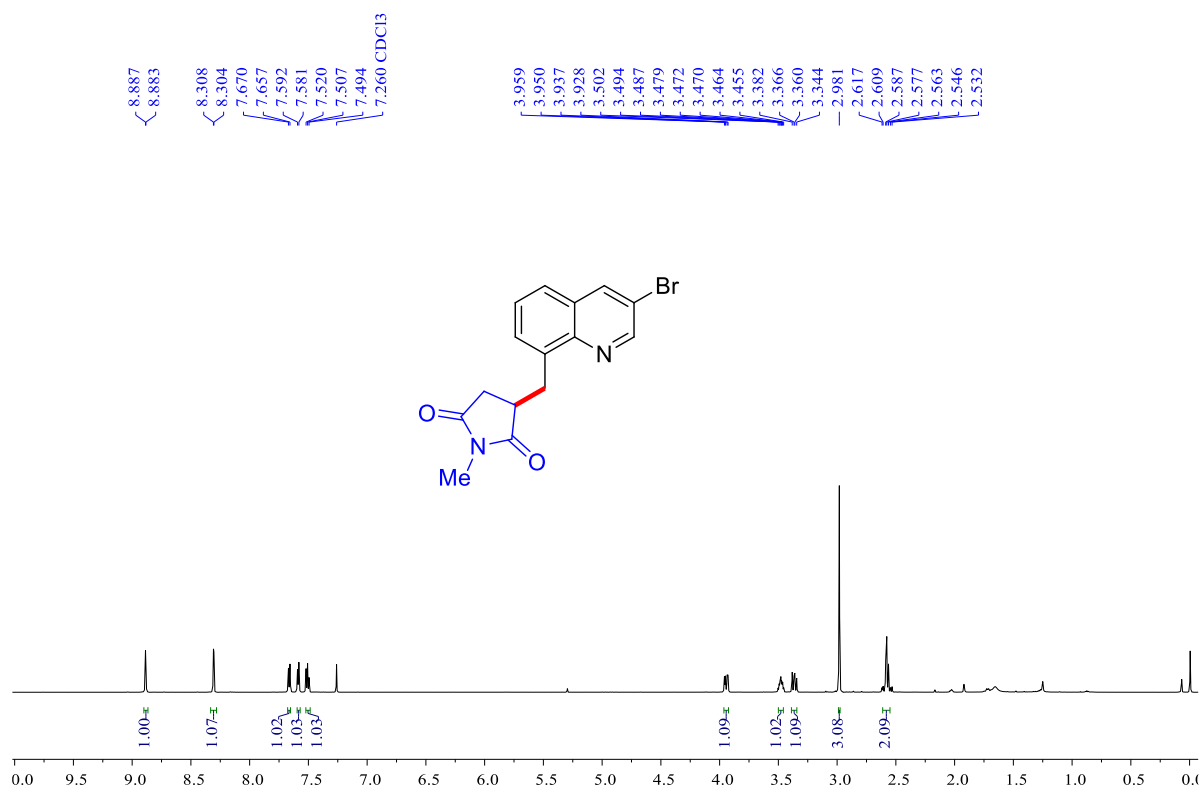

**<sup>13</sup>C NMR**

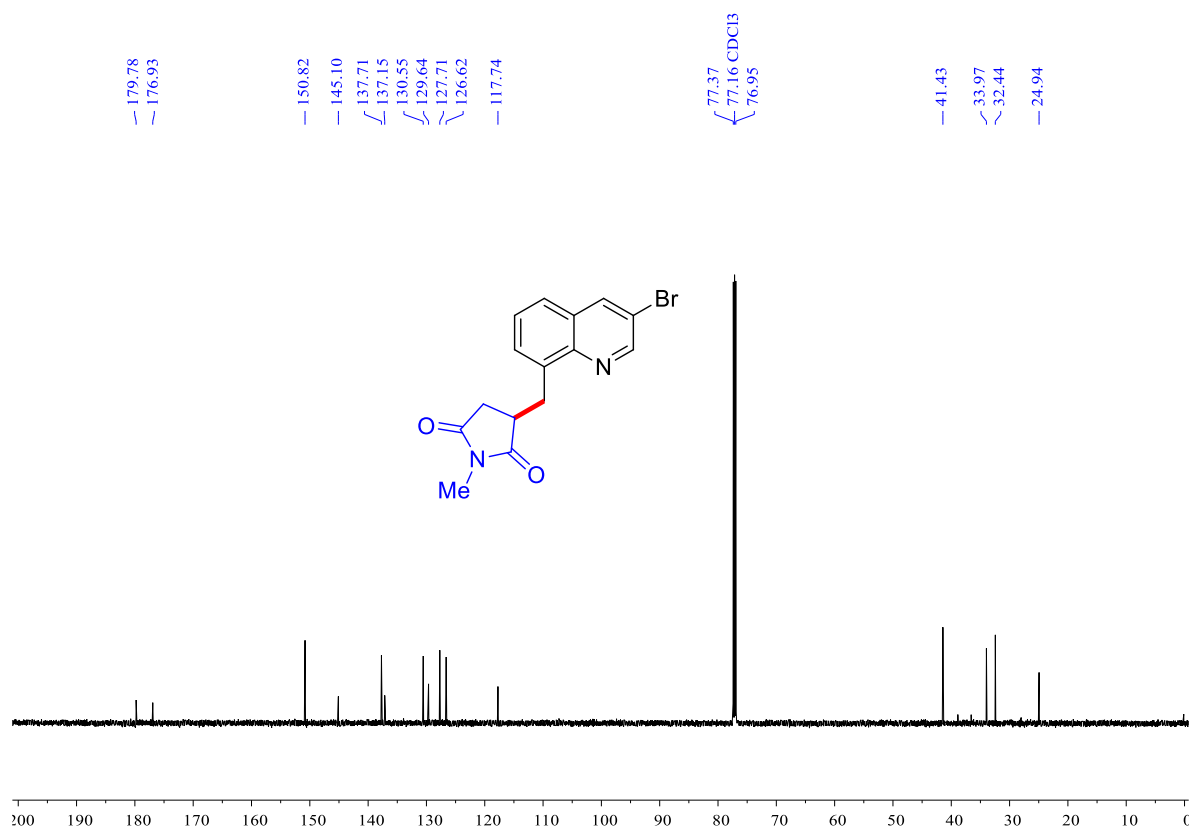



**3-((4-bromoquinolin-8-yl)methyl)-1-methylpyrrolidine-2,5-dione (Table 2, entry 3ka):**

**<sup>1</sup>H NMR**

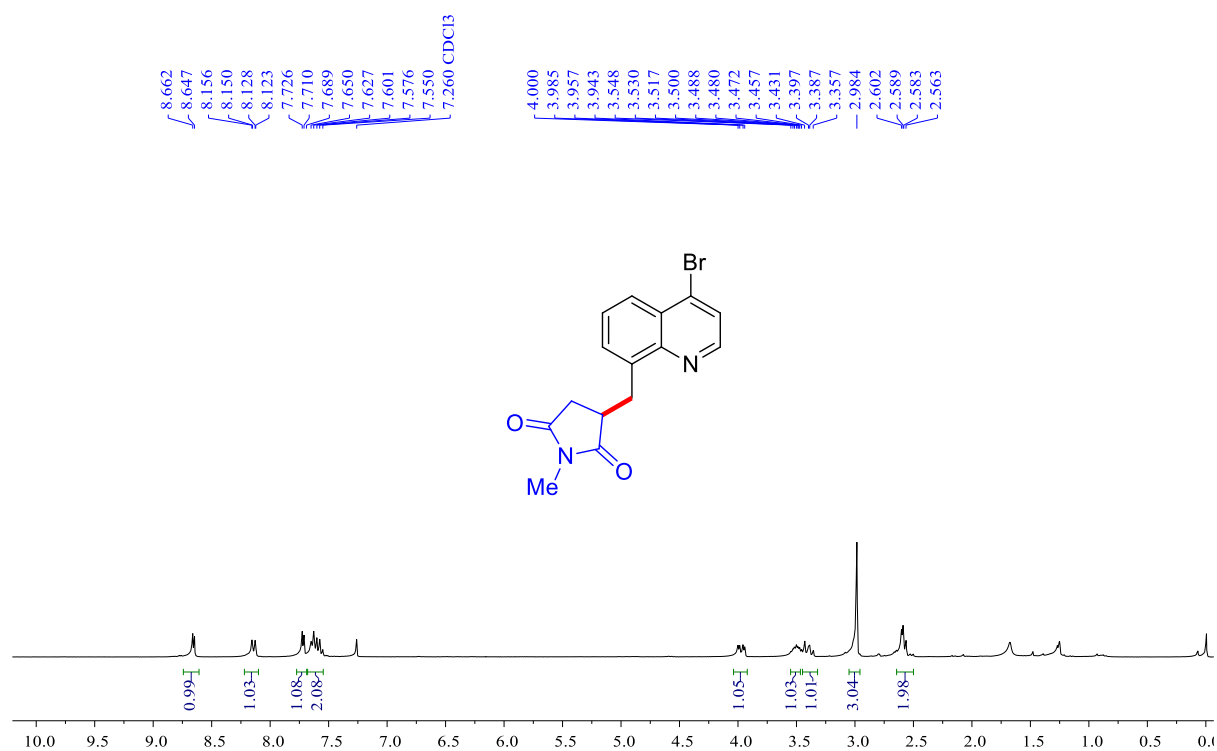

**<sup>13</sup>C NMR**

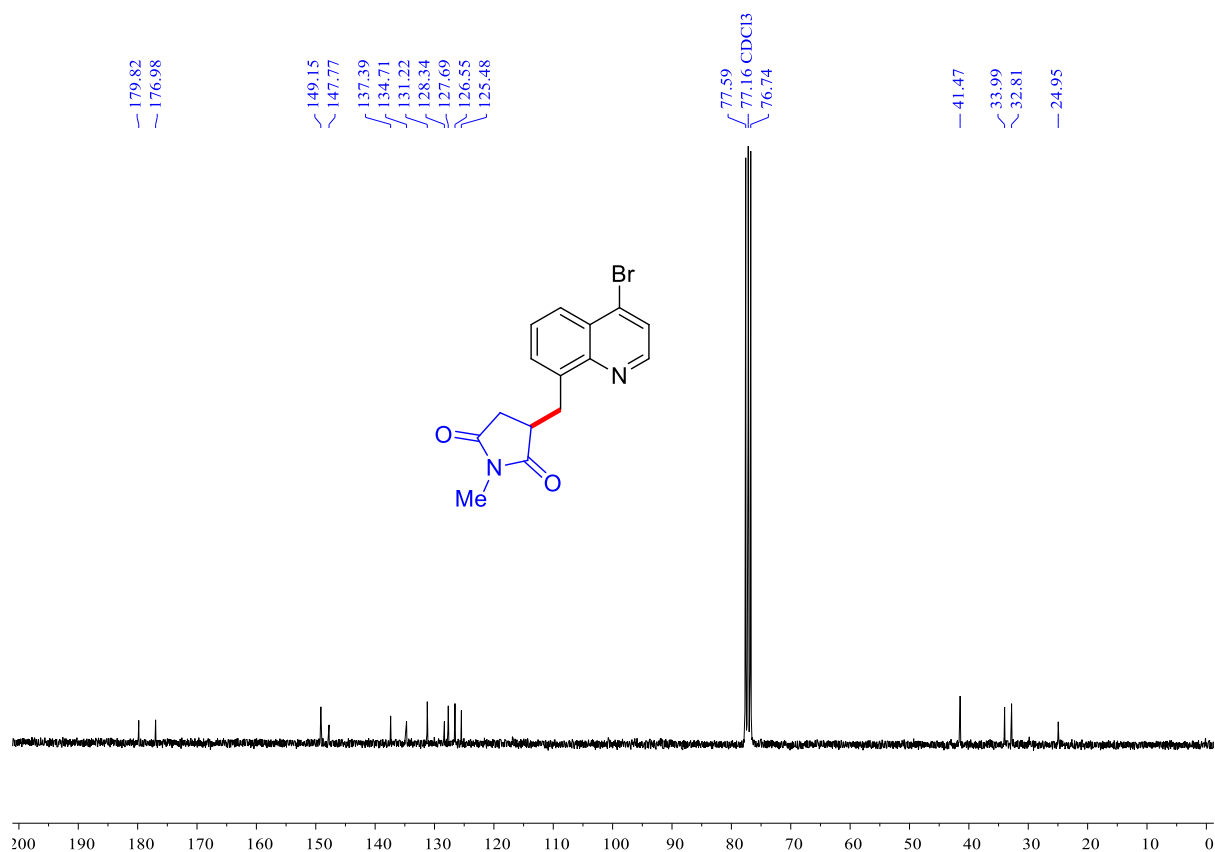

**3-((6-Bromoquinolin-8-yl)methyl)-1-methylpyrrolidine-2,5-dione (Table 2, entry 3la):**

**<sup>1</sup>H NMR**

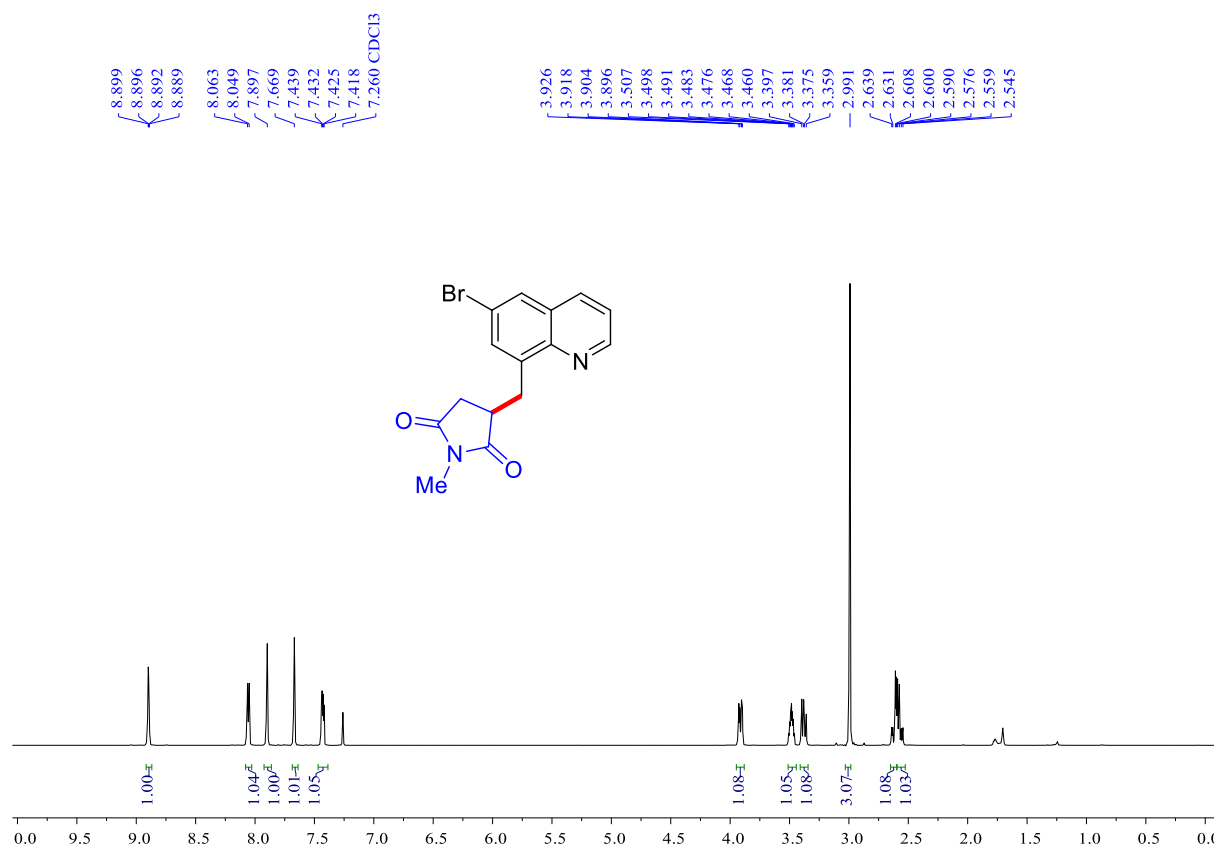

**<sup>13</sup>C NMR**

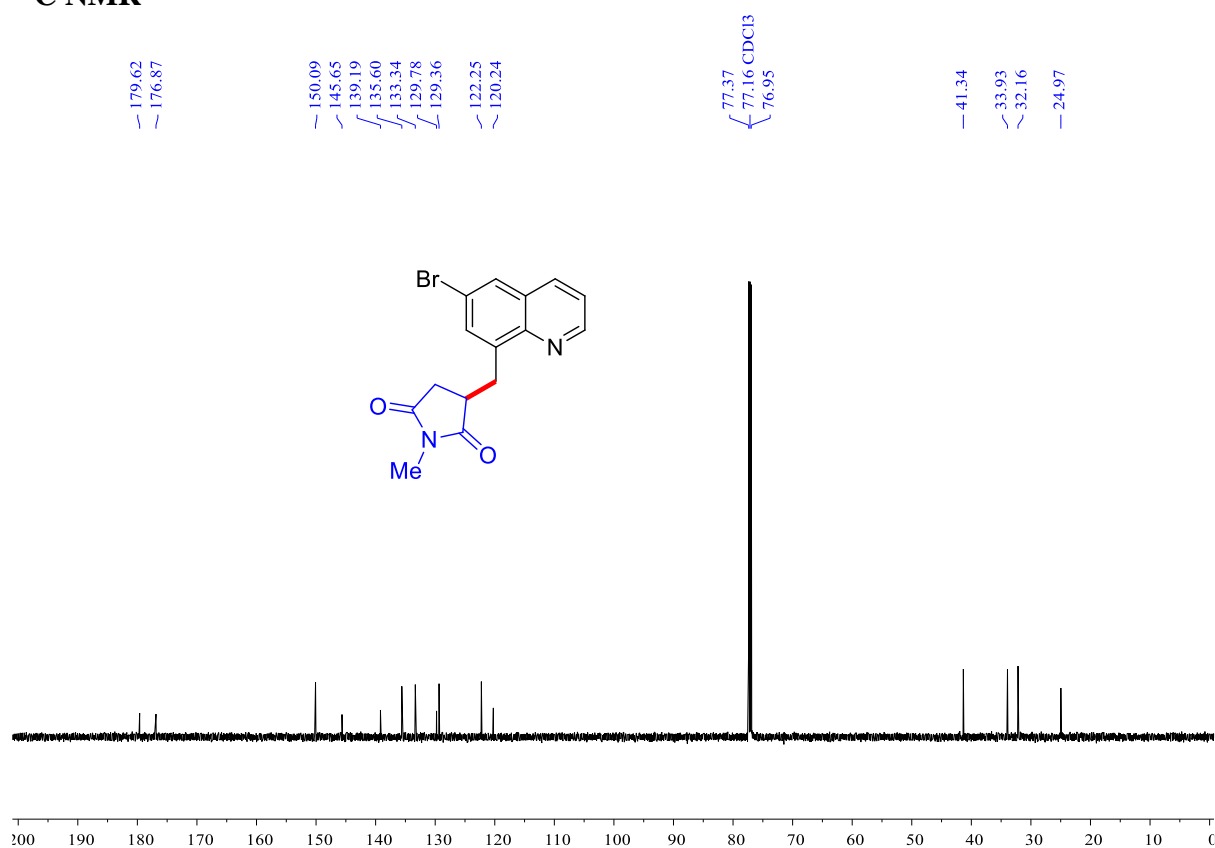

**(E)-Methyl 3-(8-((1-methyl-2,5-dioxopyrrolidin-3-yl)methyl)quinolin-6-yl)acrylate (Table 2, entry 3ma):**

**<sup>1</sup>H NMR**

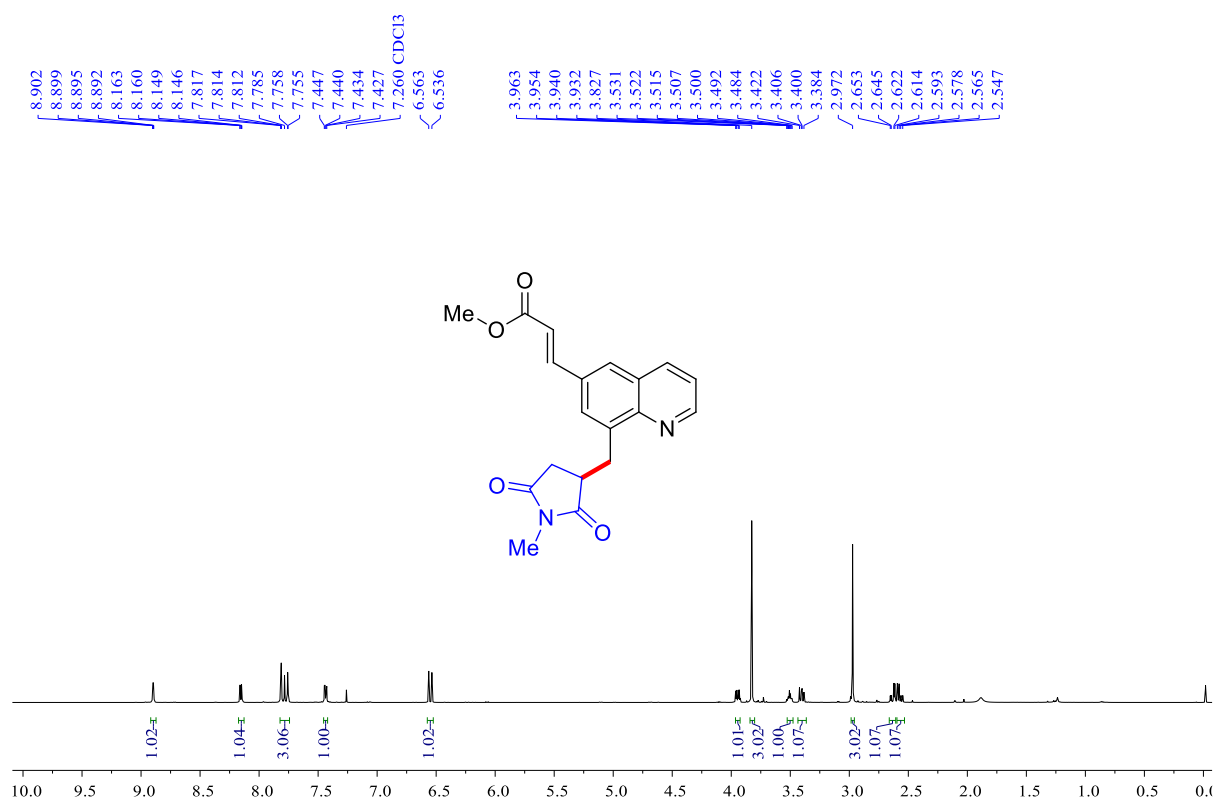

**<sup>13</sup>C NMR**

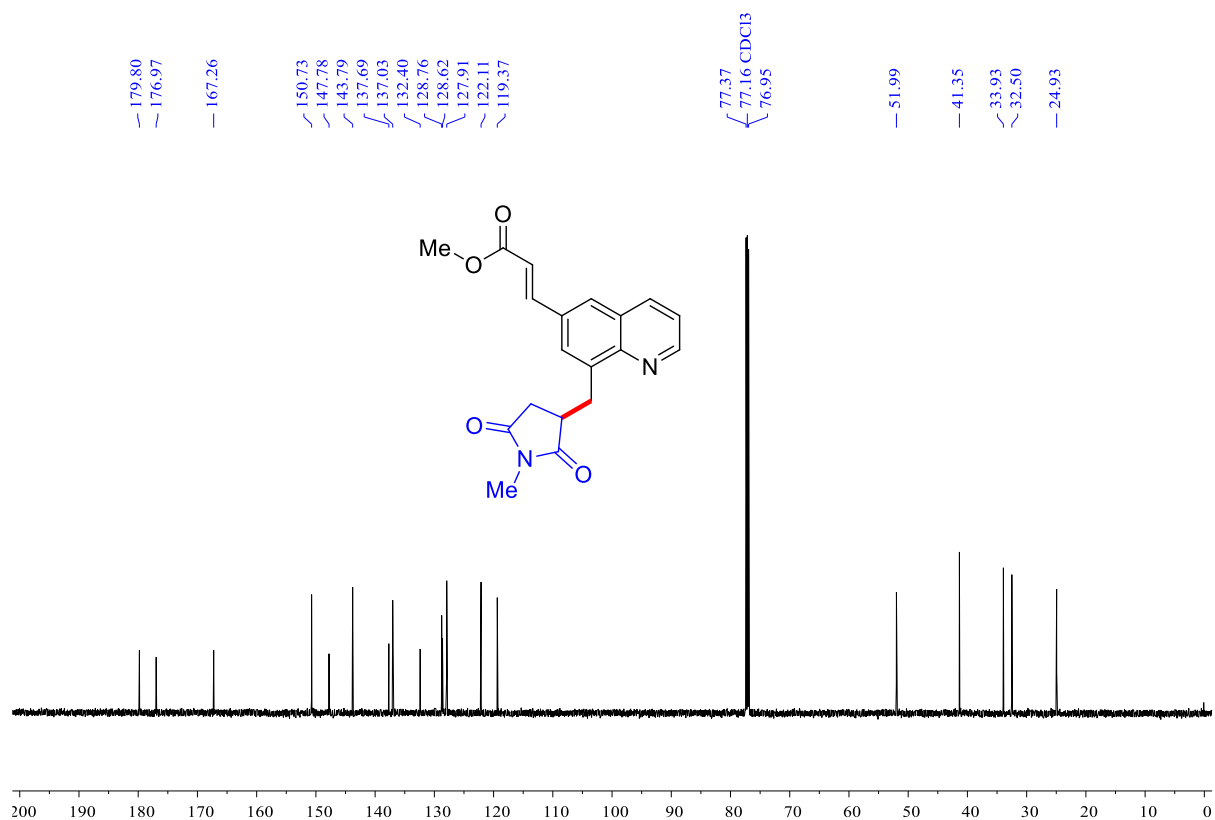

**(E)-1-methyl-3-(((6-styrylquinolin-8-yl)methyl)pyrrolidine-2,5-dione (Table 2, entry 3na):**

**<sup>1</sup>H NMR**

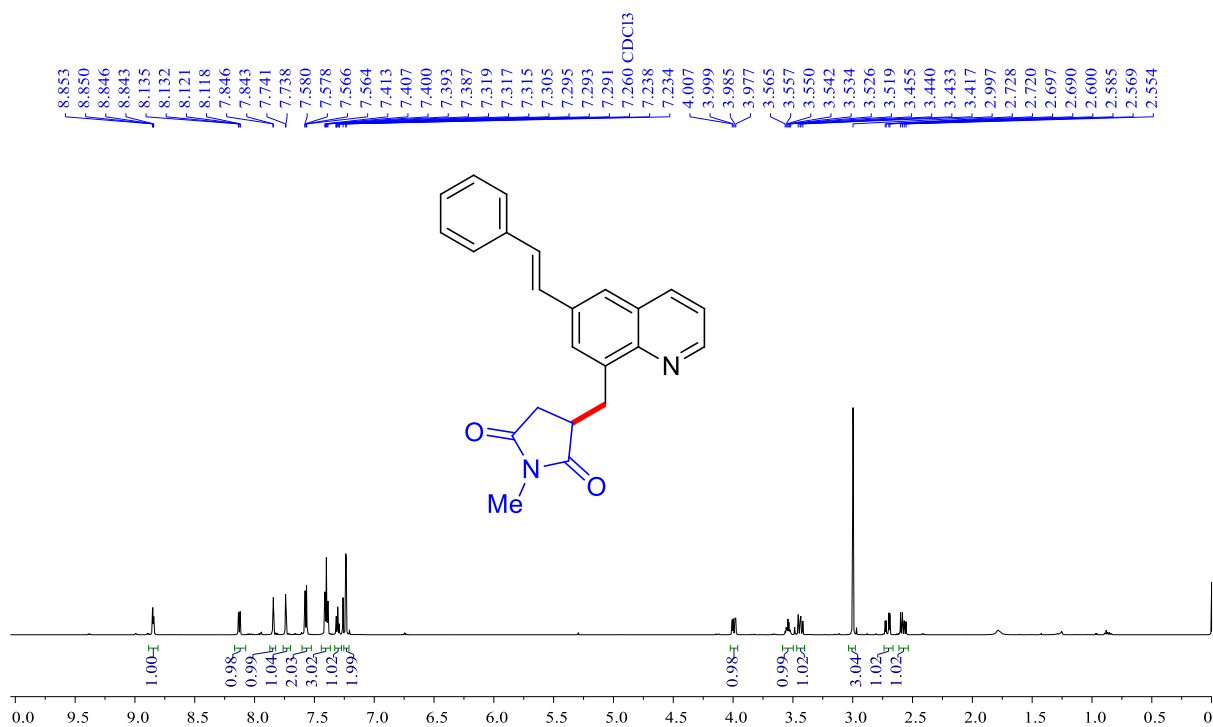

**<sup>13</sup>C NMR**

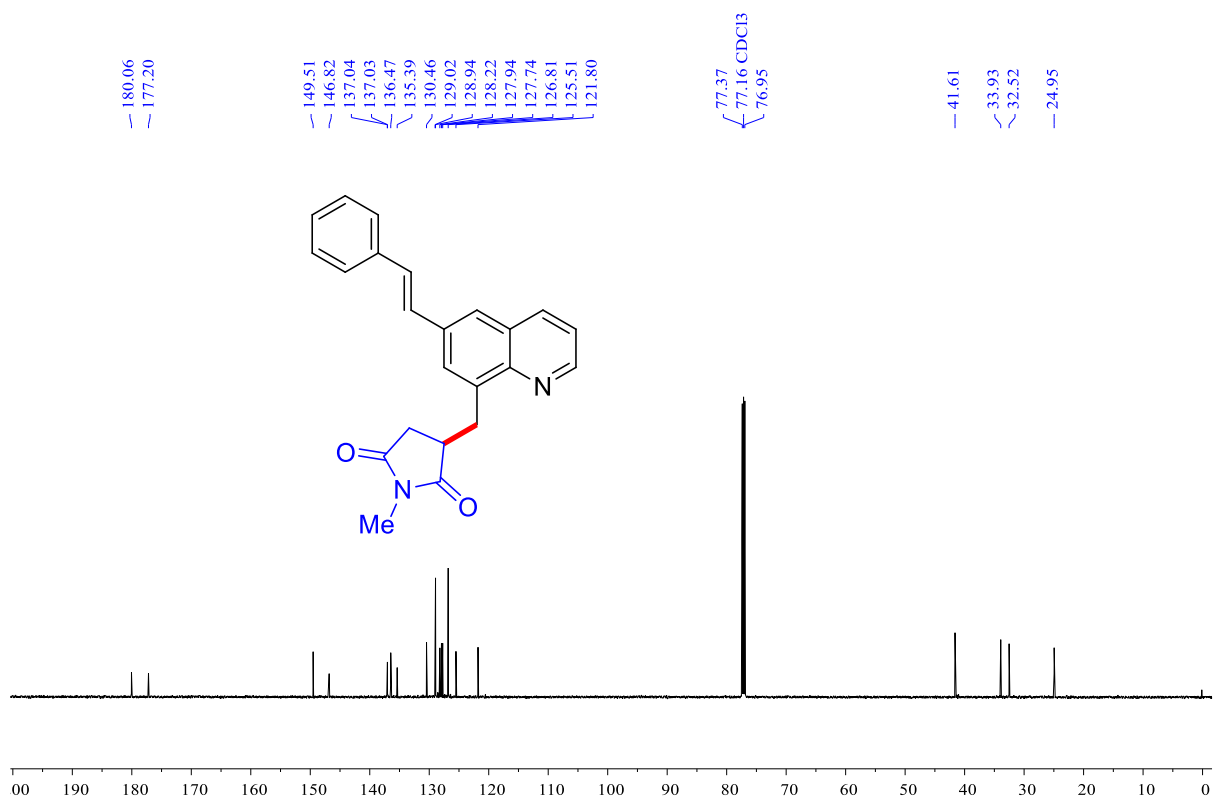

**1-Methyl-3-(((6-(phenylethynyl)quinolin-8-yl)methyl)pyrrolidine-2,5-dione (Table 2, entry 30a):**

**<sup>1</sup>H NMR**

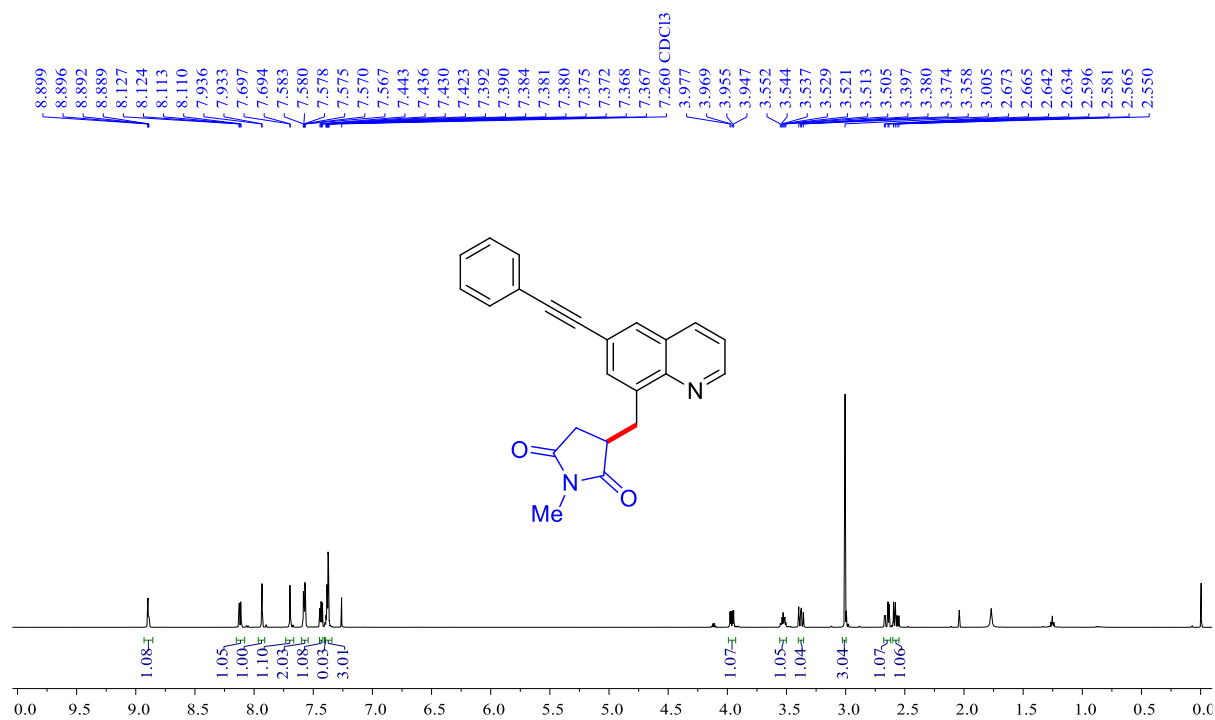

**<sup>13</sup>C NMR**

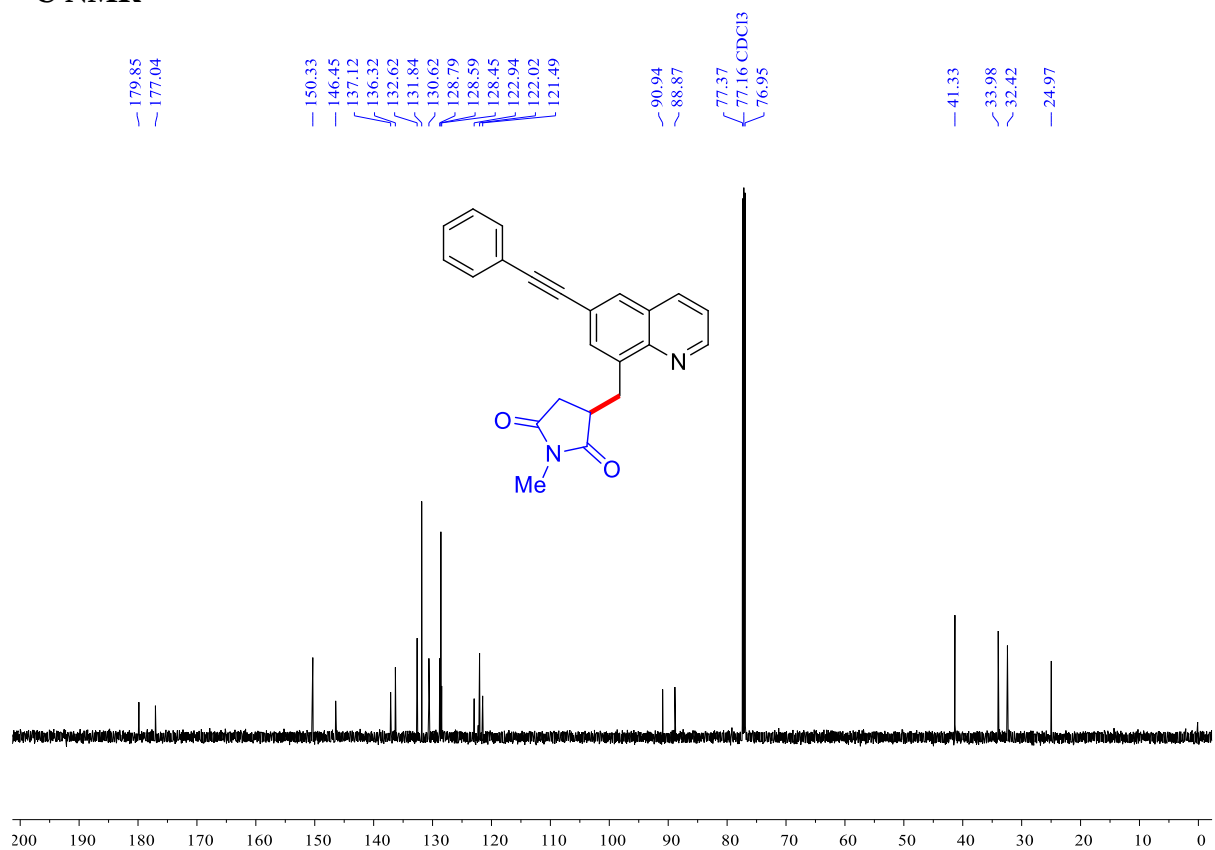

**1-Methyl-3-((4-phenylquinolin-8-yl)methyl)pyrrolidine-2,5-dione (Table 2, entry 3pa):**

**<sup>1</sup>H NMR**

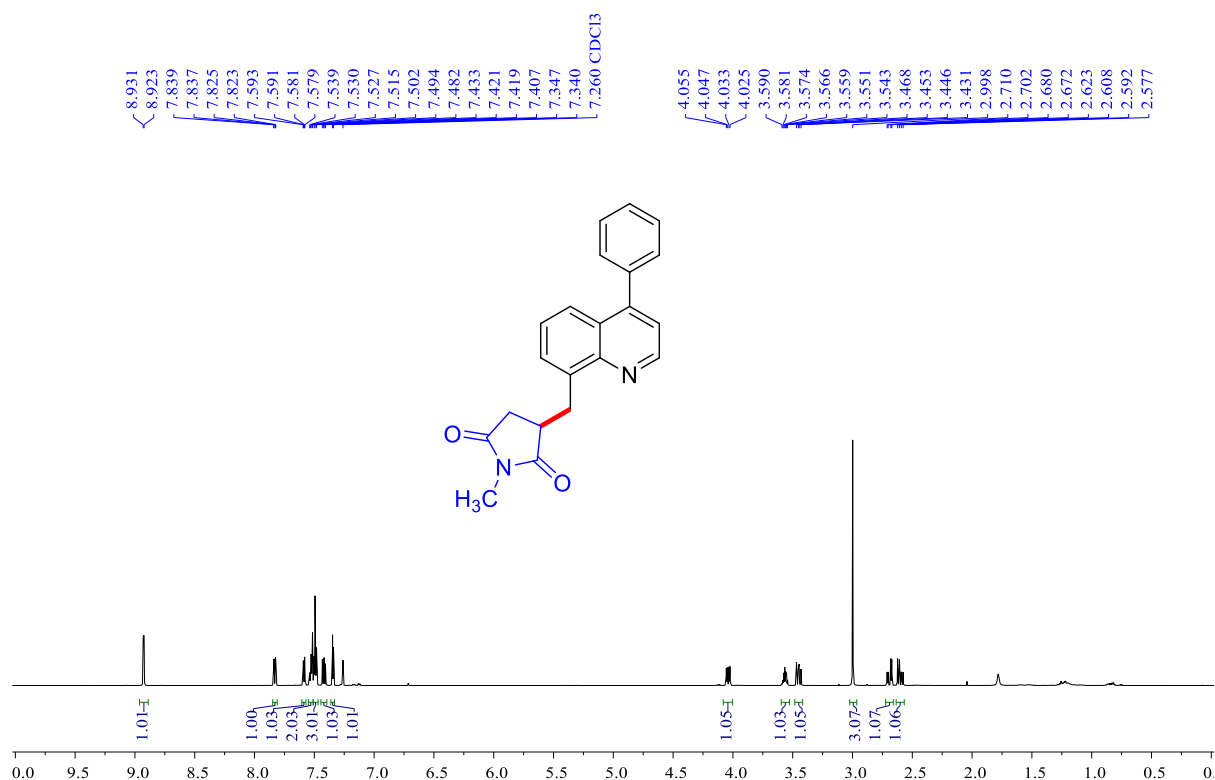

**<sup>13</sup>C NMR**

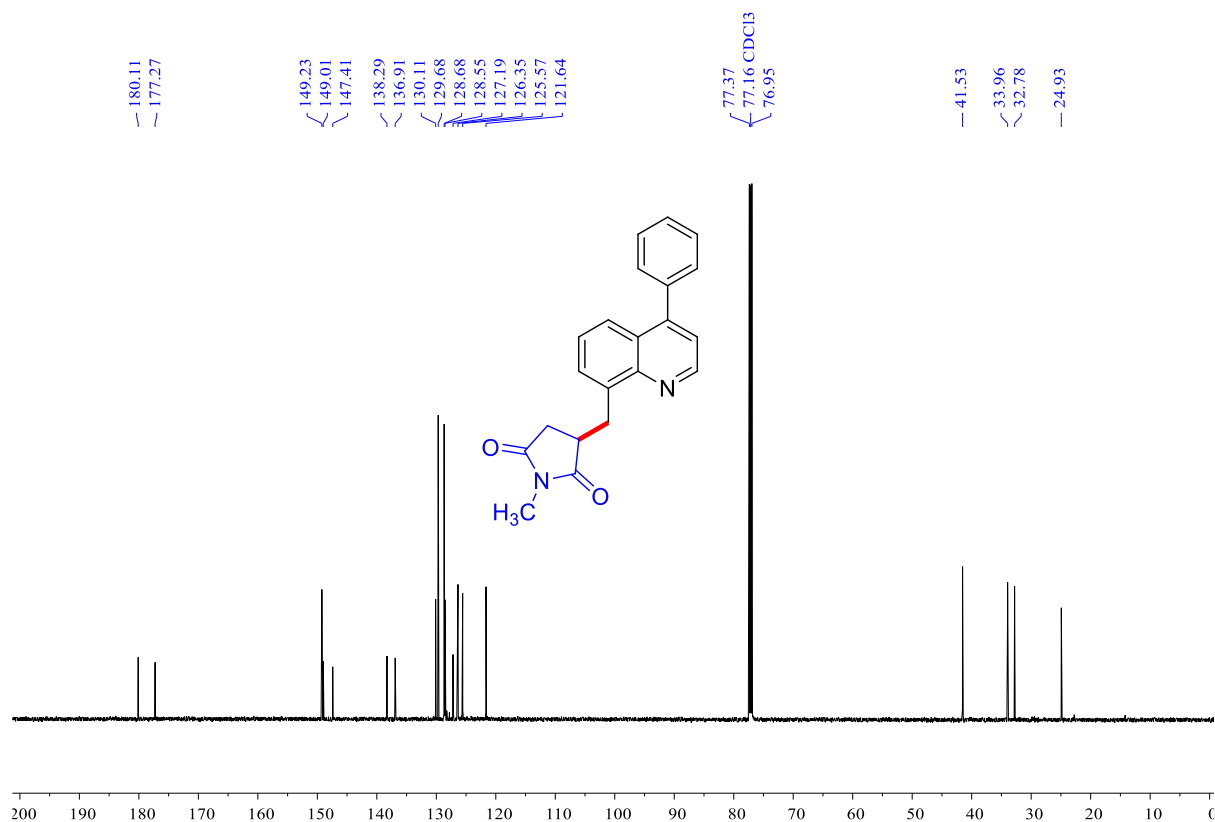

**1-methyl-3-((4-(thiophen-3-yl)quinolin-8-yl)methyl)pyrrolidine-2,5-dione (Table 2, entry 3qa):**

**<sup>1</sup>H NMR**

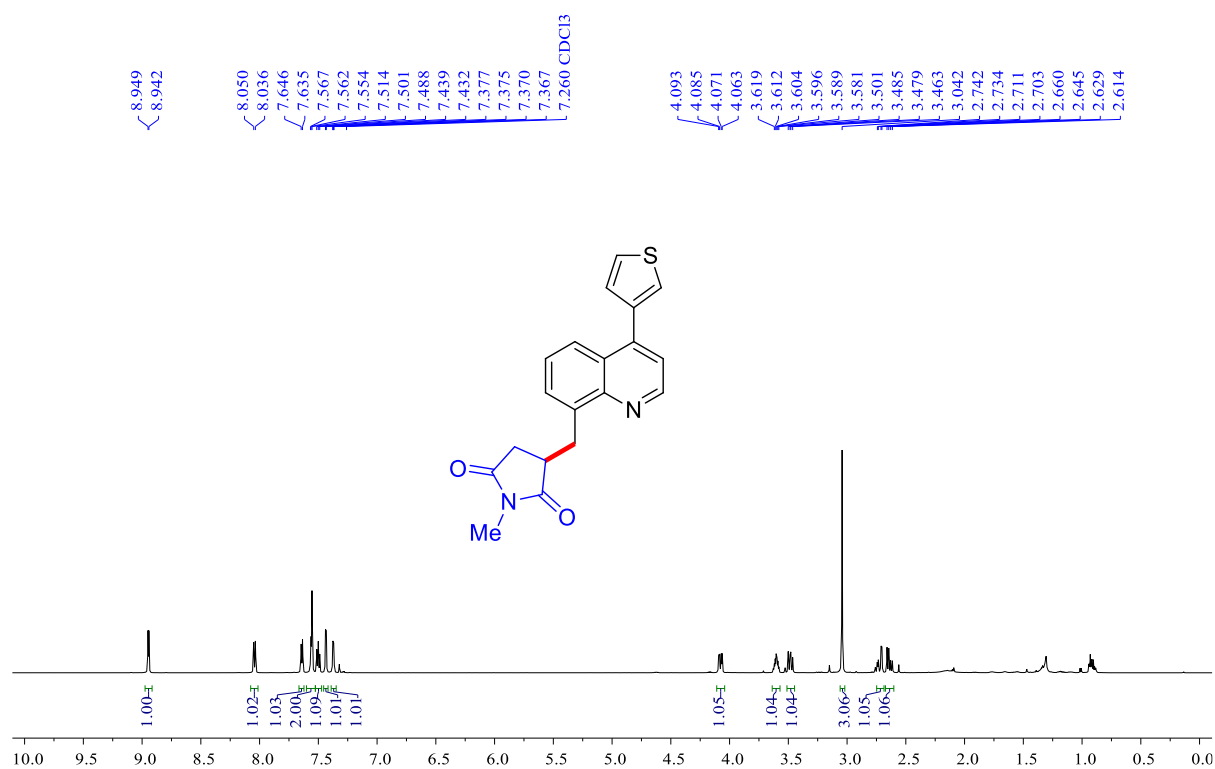

**<sup>13</sup>C NMR**

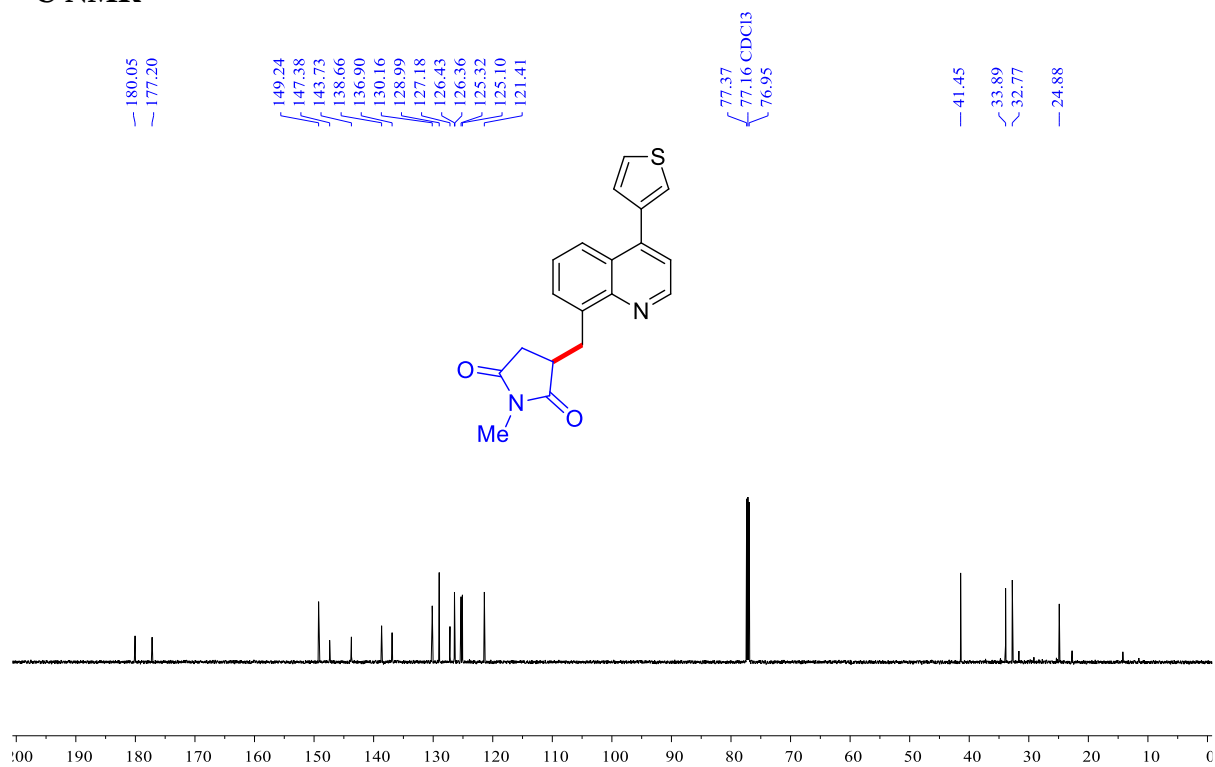

**3-((4-(2,5-Dioxopyrrolidin-1-yl)quinolin-8-yl)methyl)-1-methylpyrrolidine-2,5-dione (Table 2, entry 3ra):**

**<sup>1</sup>H NMR**

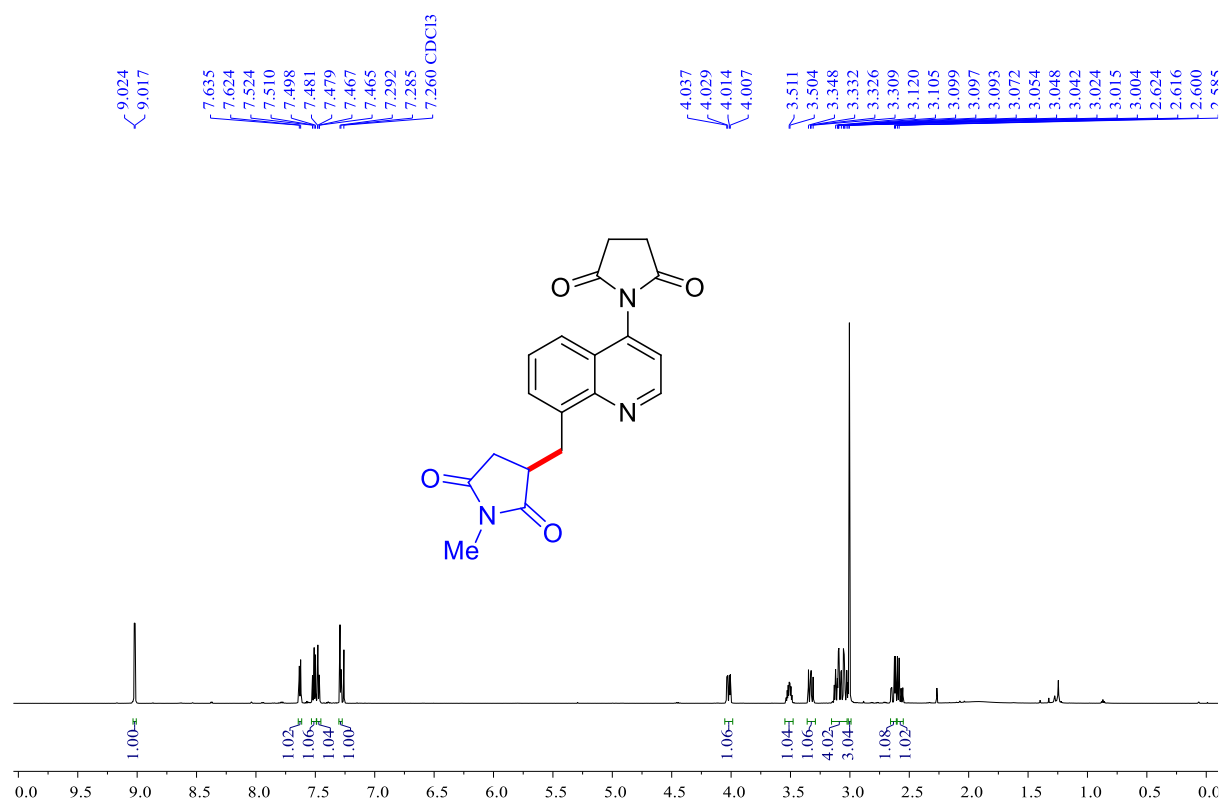

**<sup>13</sup>C NMR**

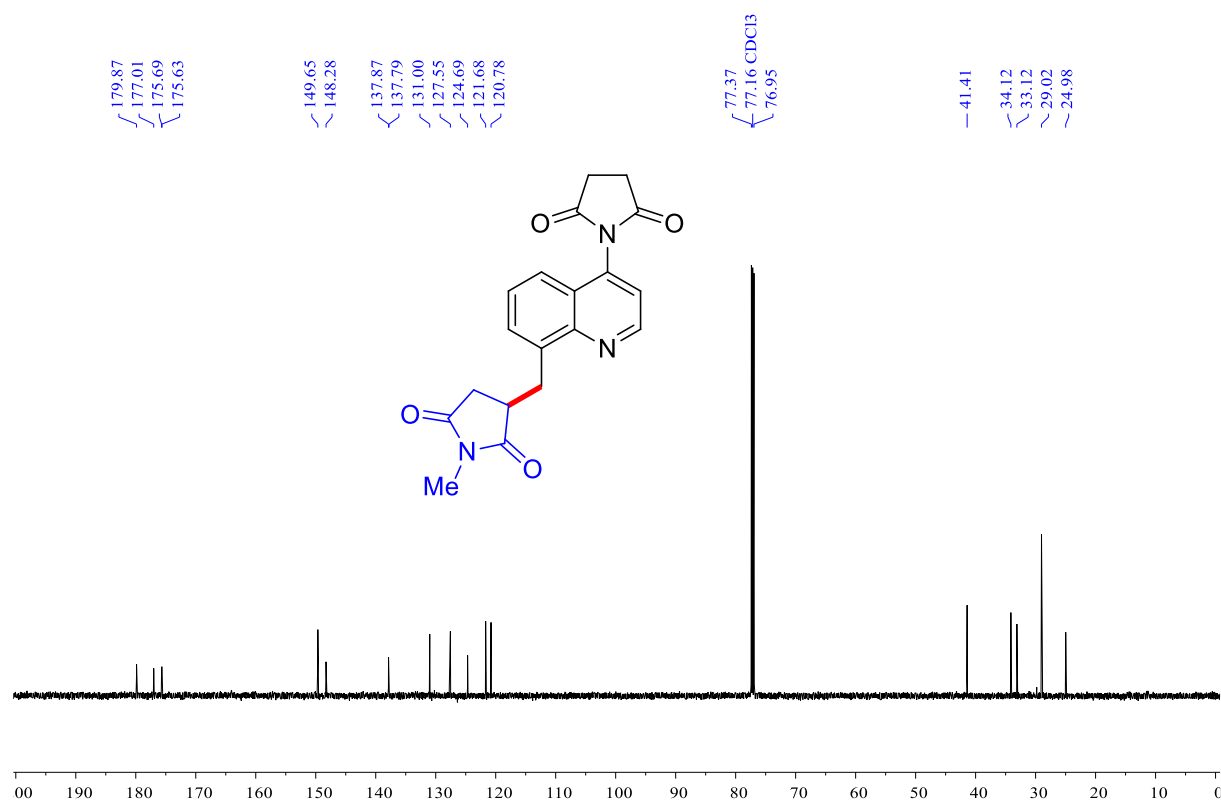



**1-Methyl-3-(quinolin-8-ylmethyl)pyrrolidine-2,5-dione (Table 3, entry 3aa):**

**<sup>1</sup>H NMR**

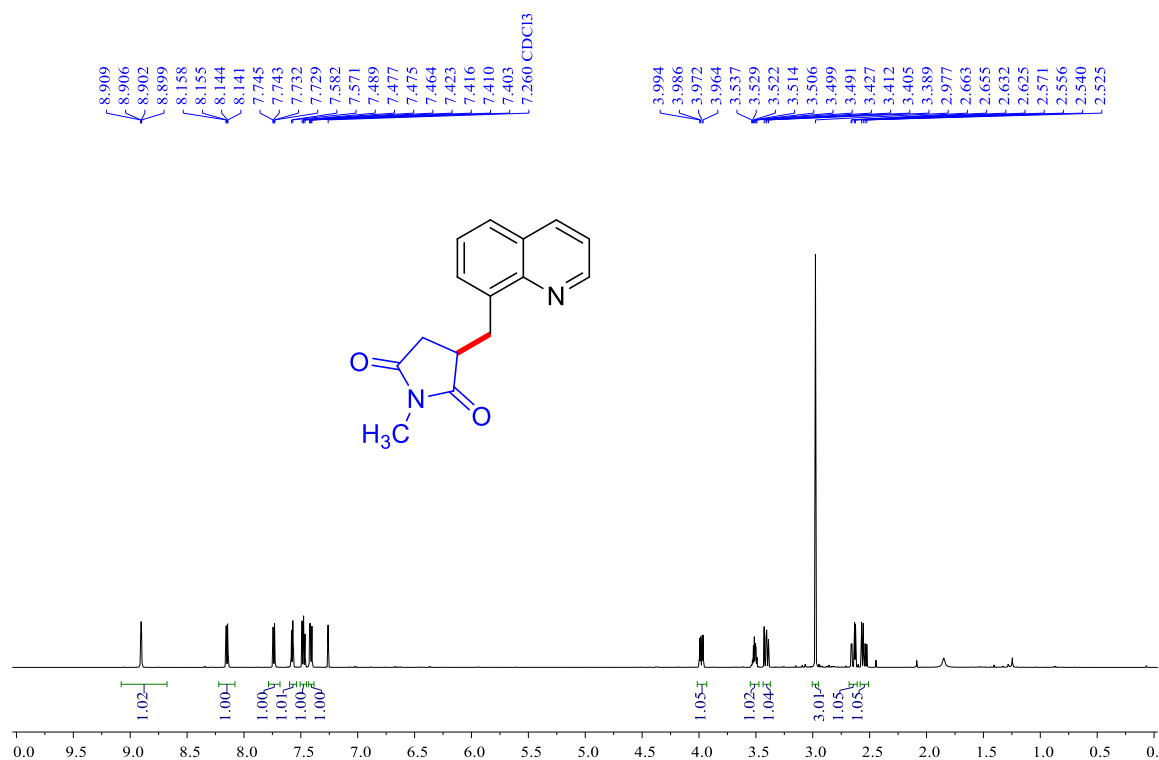

**<sup>13</sup>C NMR**

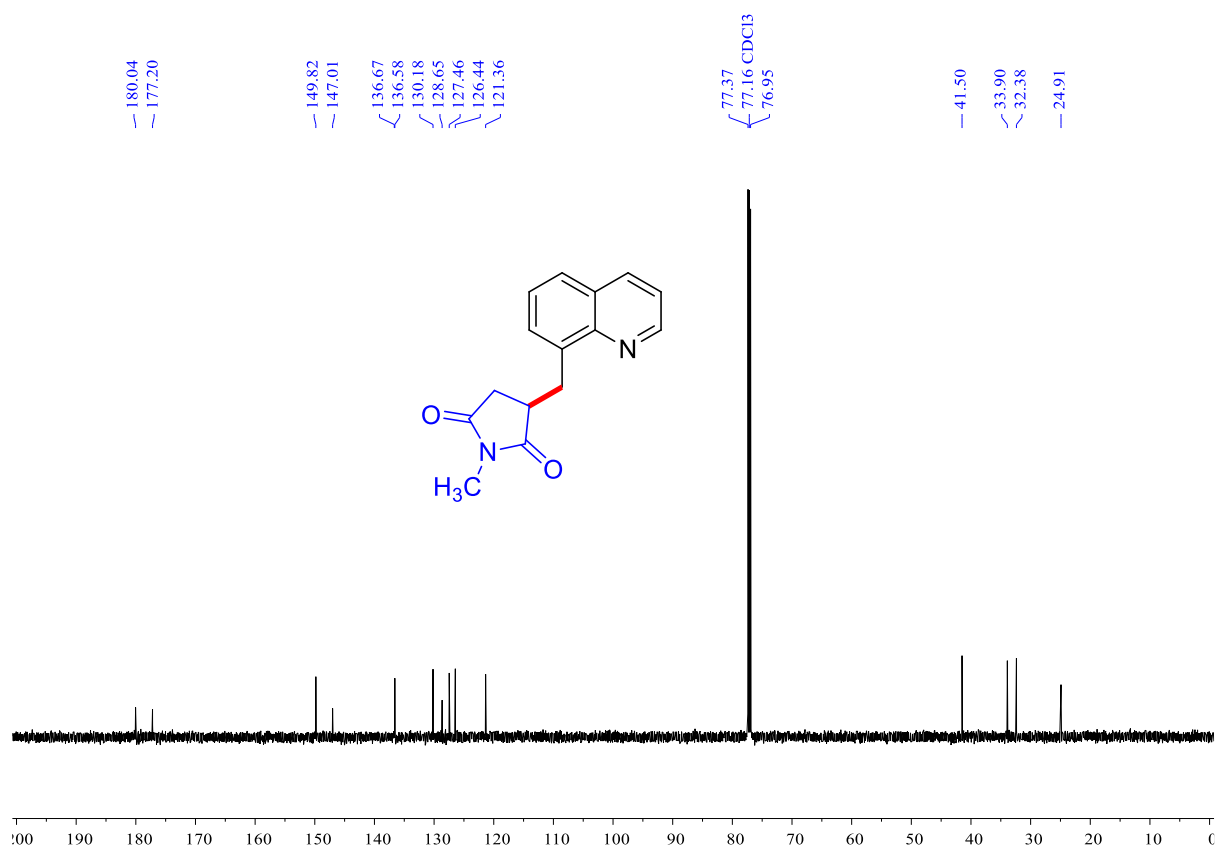

**1-Ethyl-3-(quinolin-8-ylmethyl)pyrrolidine-2,5-dione (Table 3, entry 3ab):**

**<sup>1</sup>H NMR**

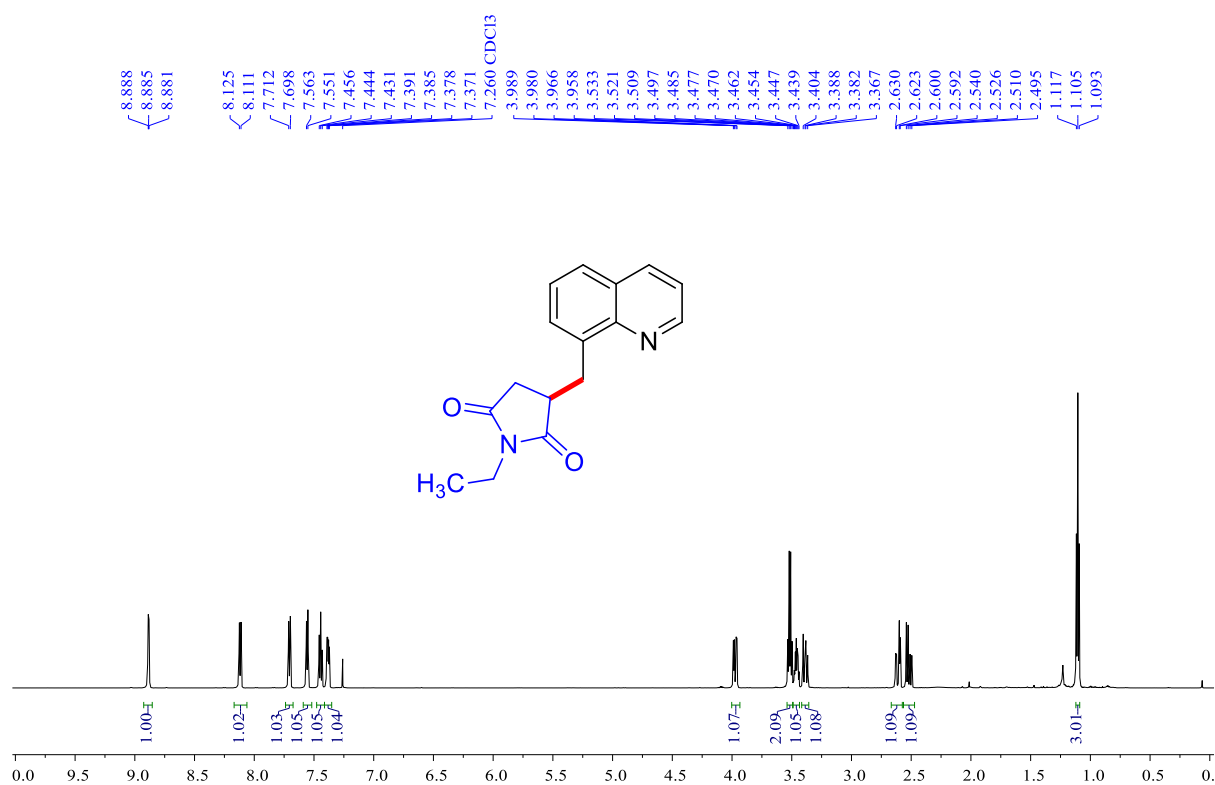

**<sup>13</sup>C NMR**

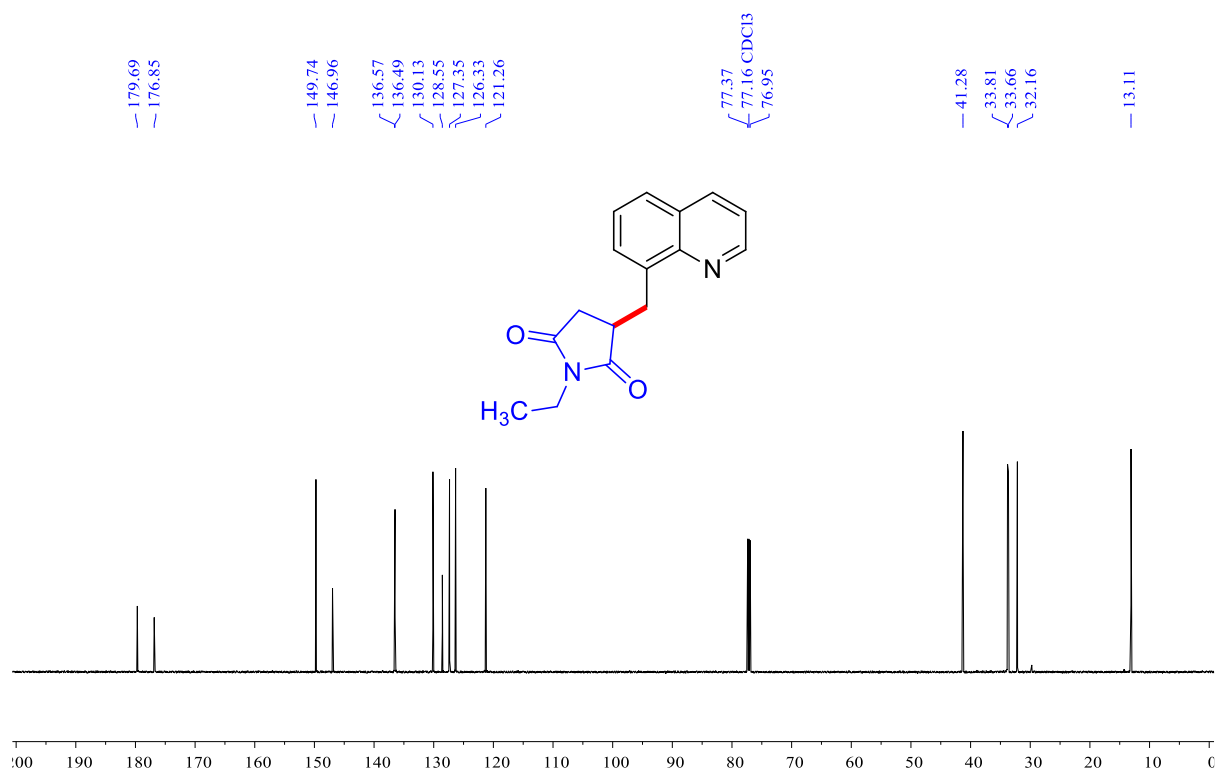

**1-Propyl-3-(quinolin-8-ylmethyl)pyrrolidine-2,5-dione (Table 3, entry 3ac):**

**<sup>1</sup>H NMR**

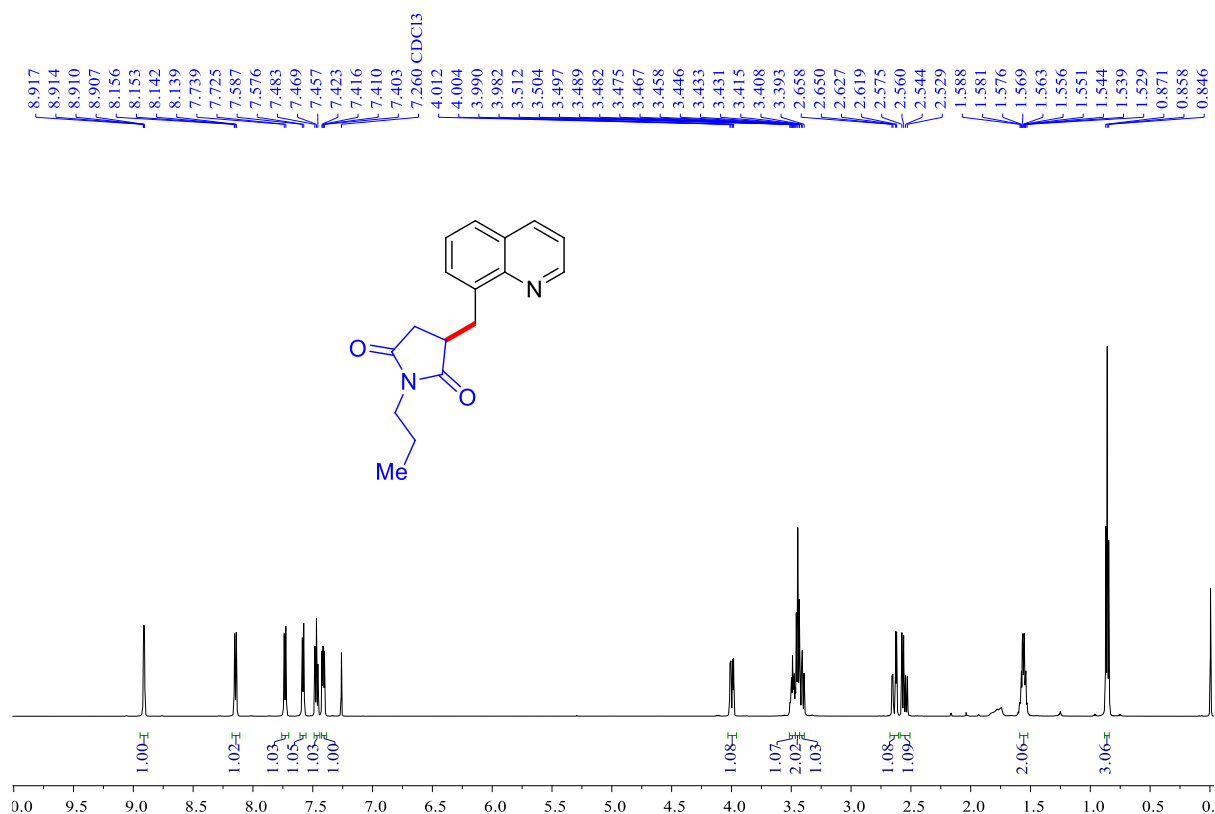

**<sup>13</sup>C NMR**

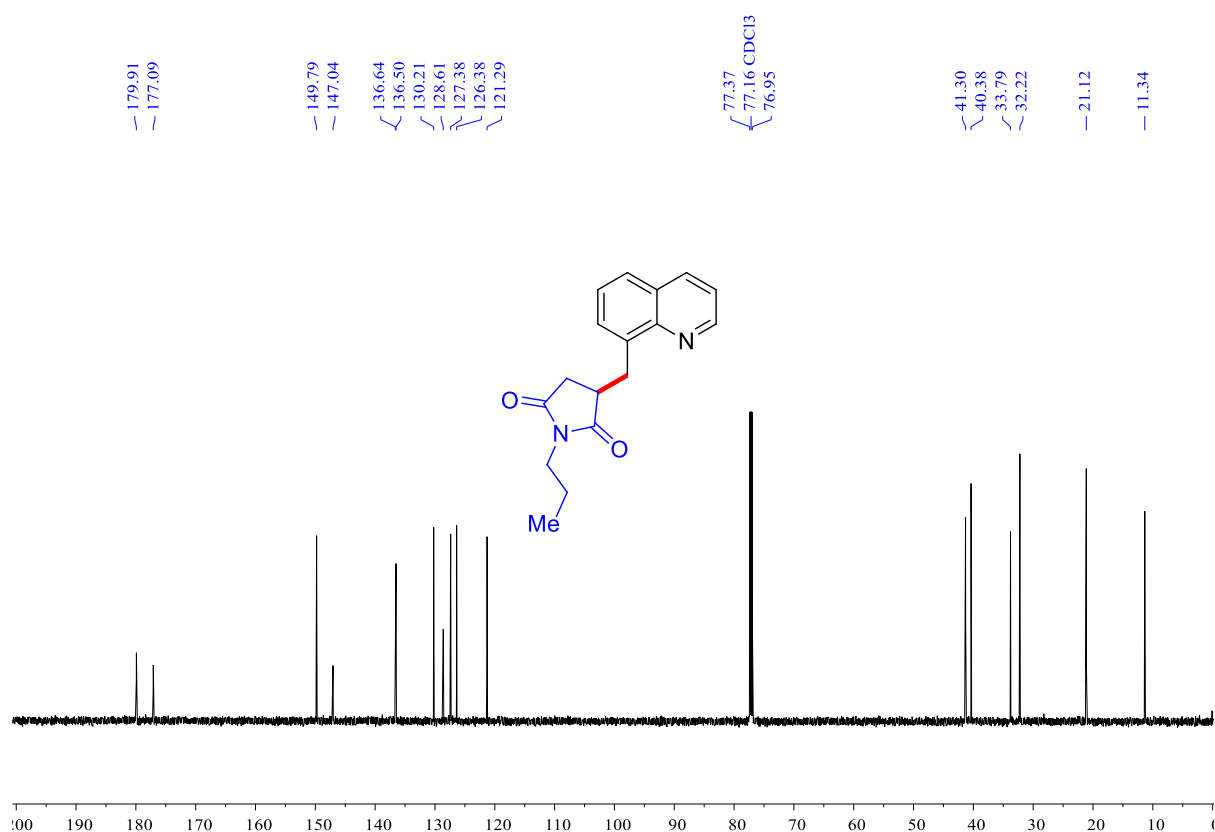

**1-(tert-Butyl)-3-(quinolin-8-ylmethyl)pyrrolidine-2,5-dione (Table 3, entry 3ad):**

**<sup>1</sup>H NMR**

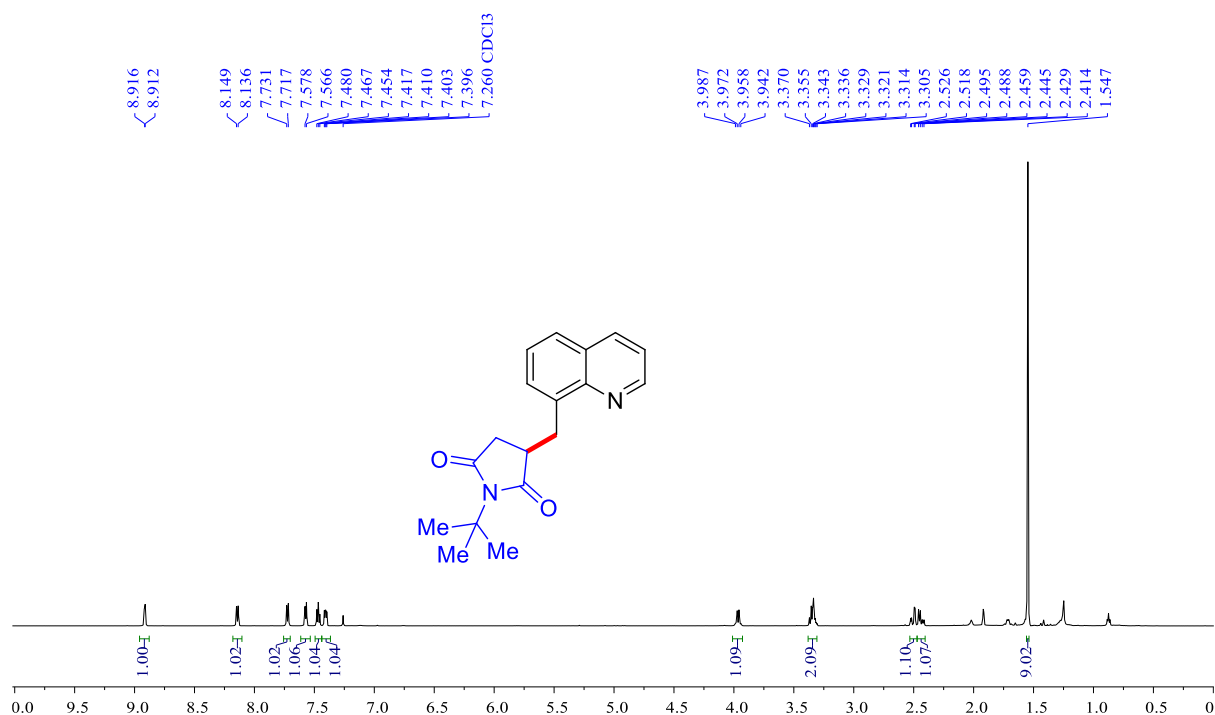

**<sup>13</sup>C NMR**

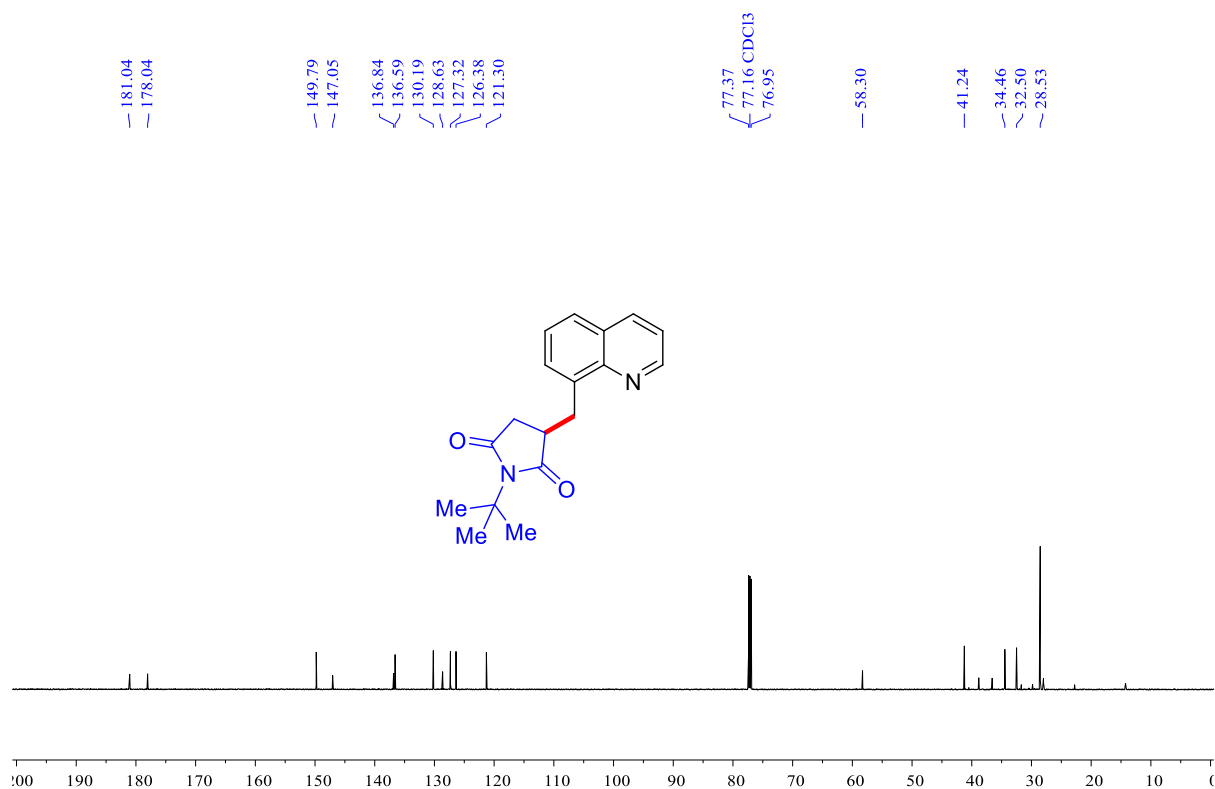

**1-Cyclohexyl-3-(quinolin-8-ylmethyl)pyrrolidine-2,5-dione (Table 3, entry 3ae):**

**<sup>1</sup>H NMR**

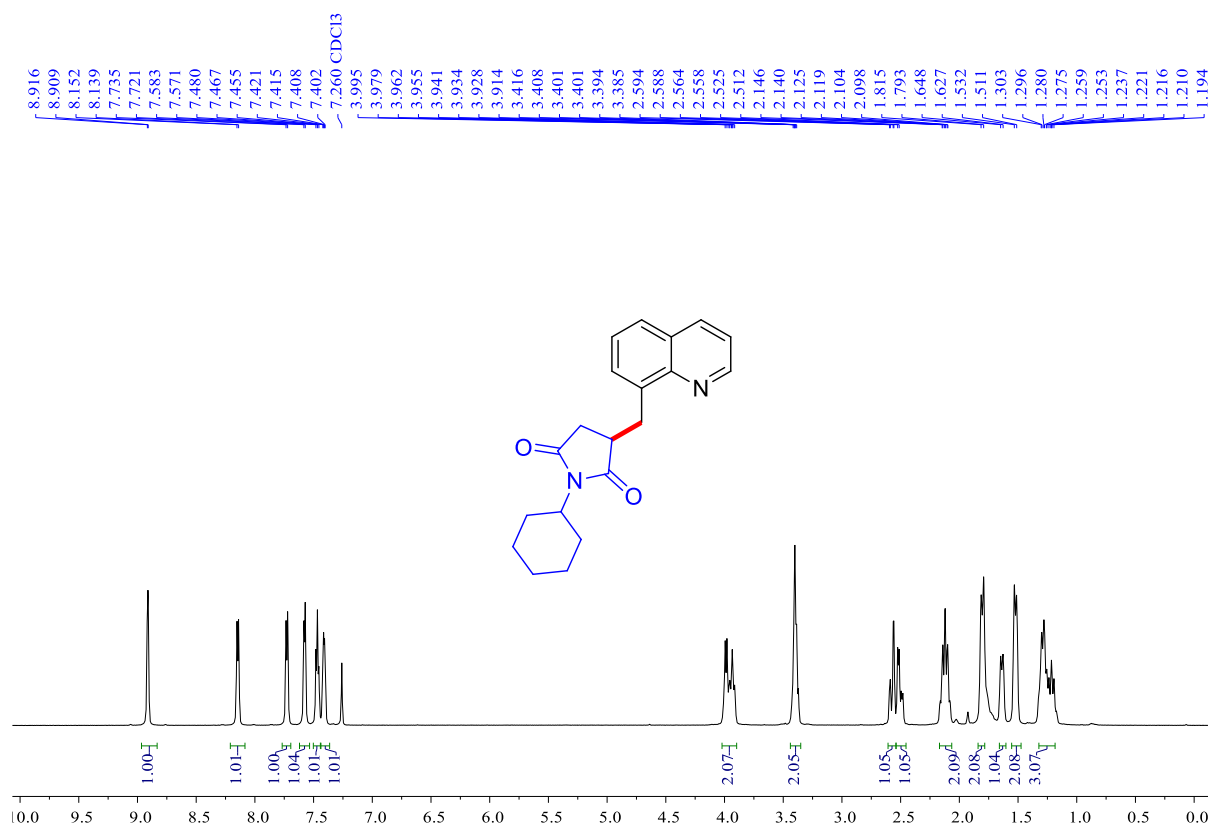

**<sup>13</sup>C NMR**

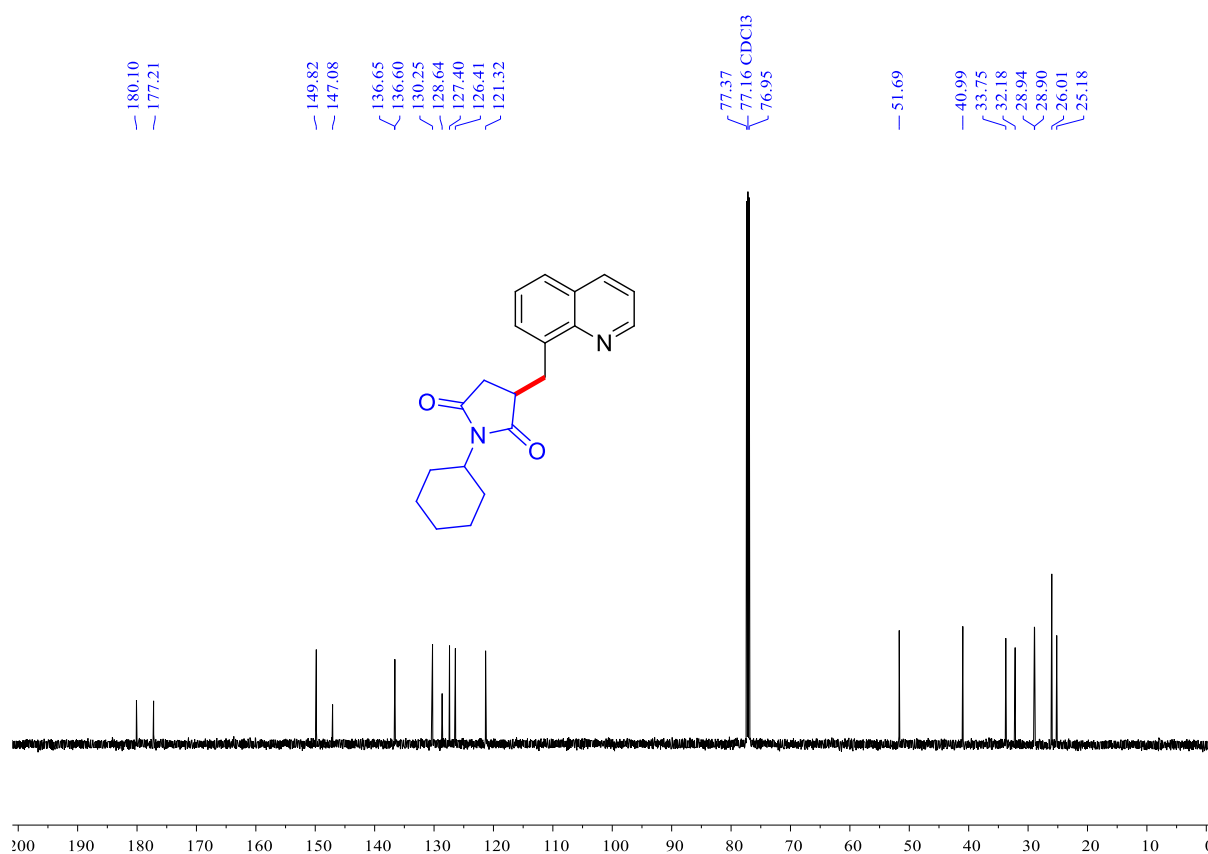

***1-Benzyl-3-(quinolin-8-ylmethyl)pyrrolidine-2,5-dione (Table 3, entry 3af):***

**<sup>1</sup>H NMR**

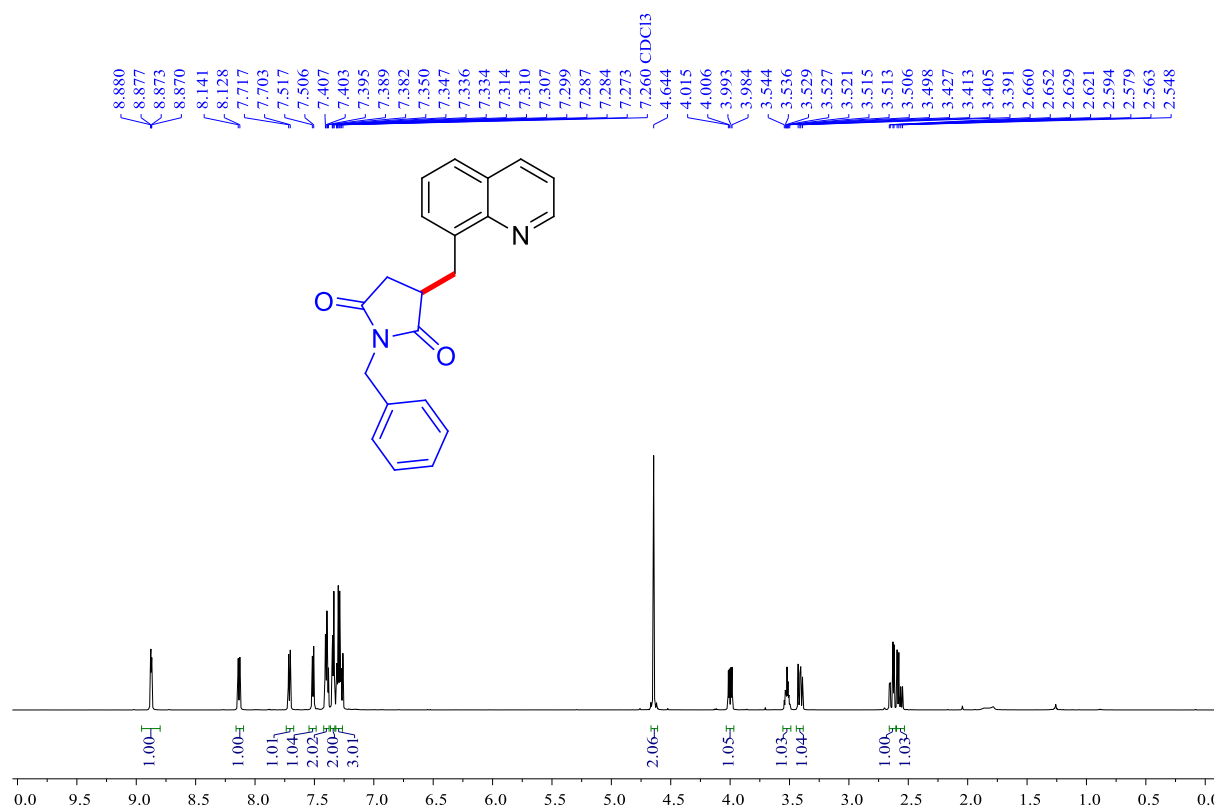

**<sup>13</sup>C NMR**

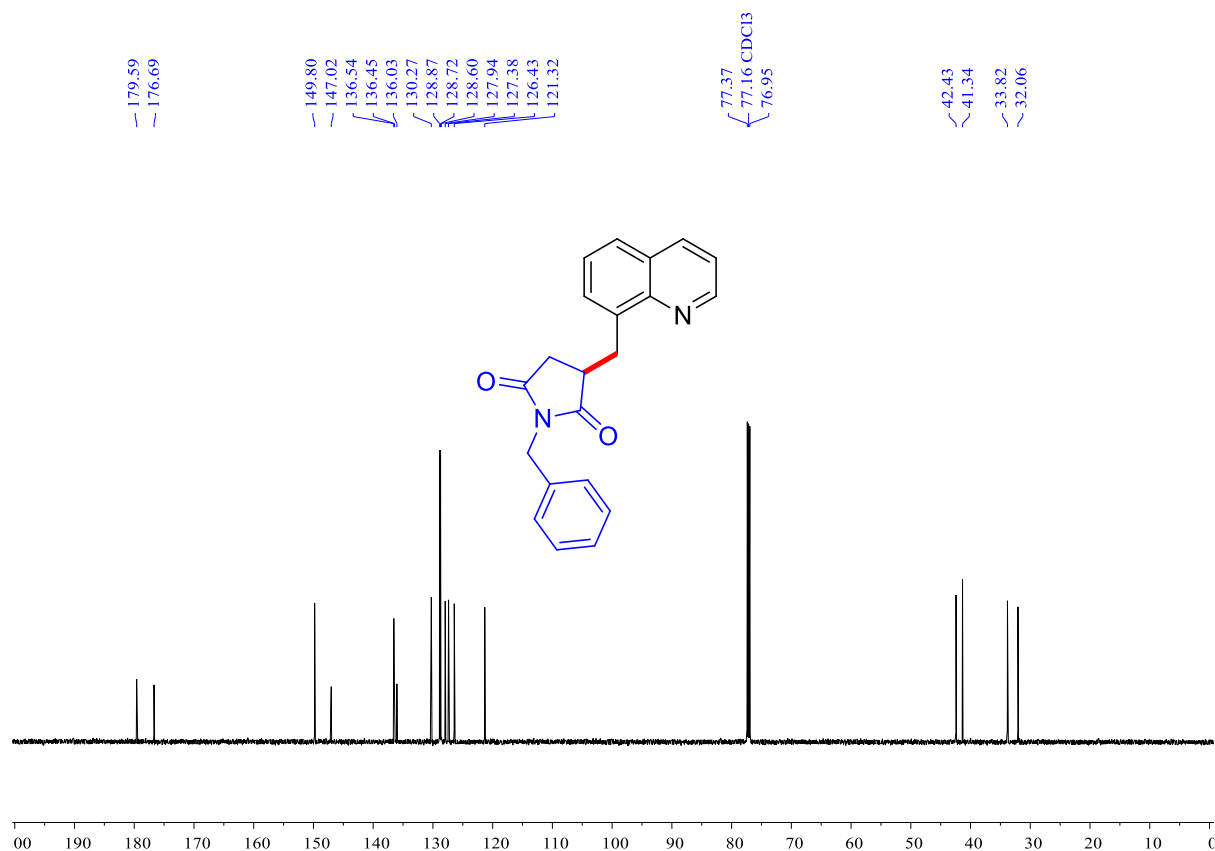

**1-Phenylethyl)-3-(quinolin-8-ylmethyl)pyrrolidine-2,5-dione (Table 3, entry 3ag):**

**<sup>1</sup>H NMR**

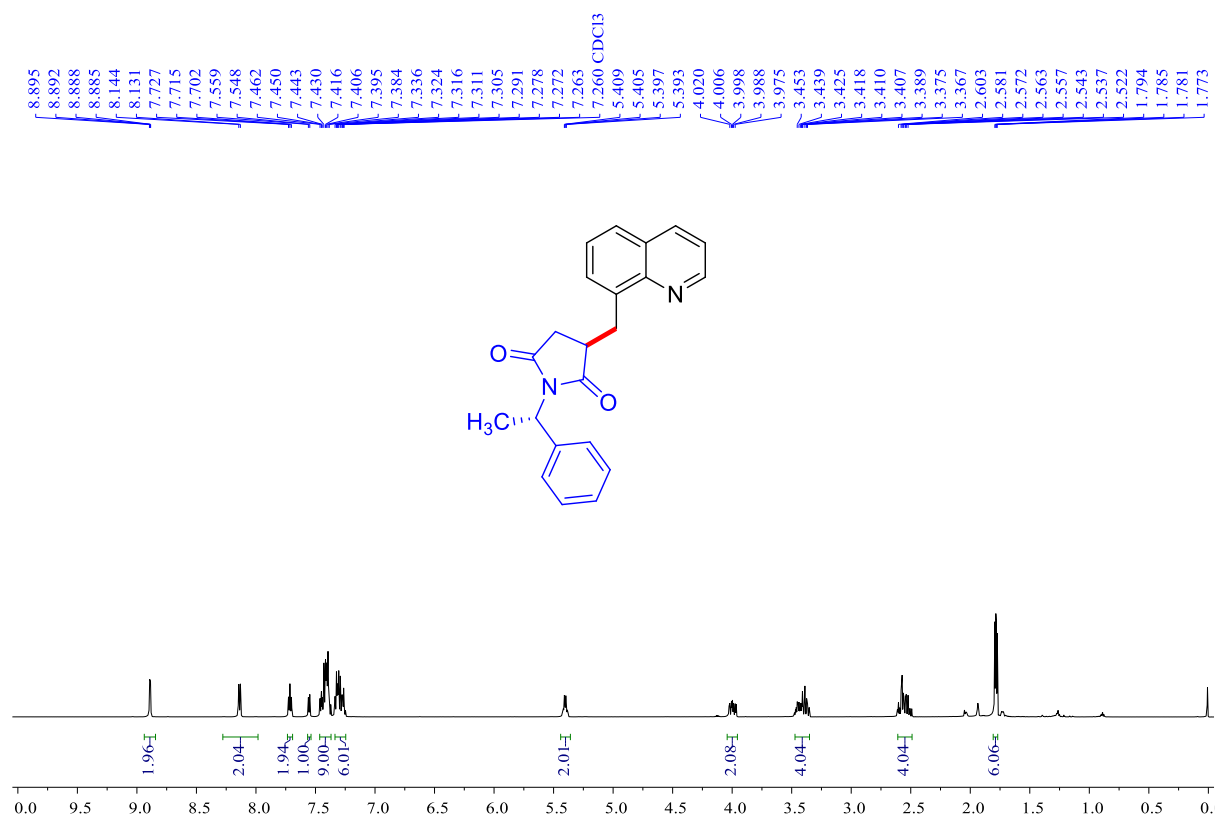

**<sup>13</sup>C NMR**

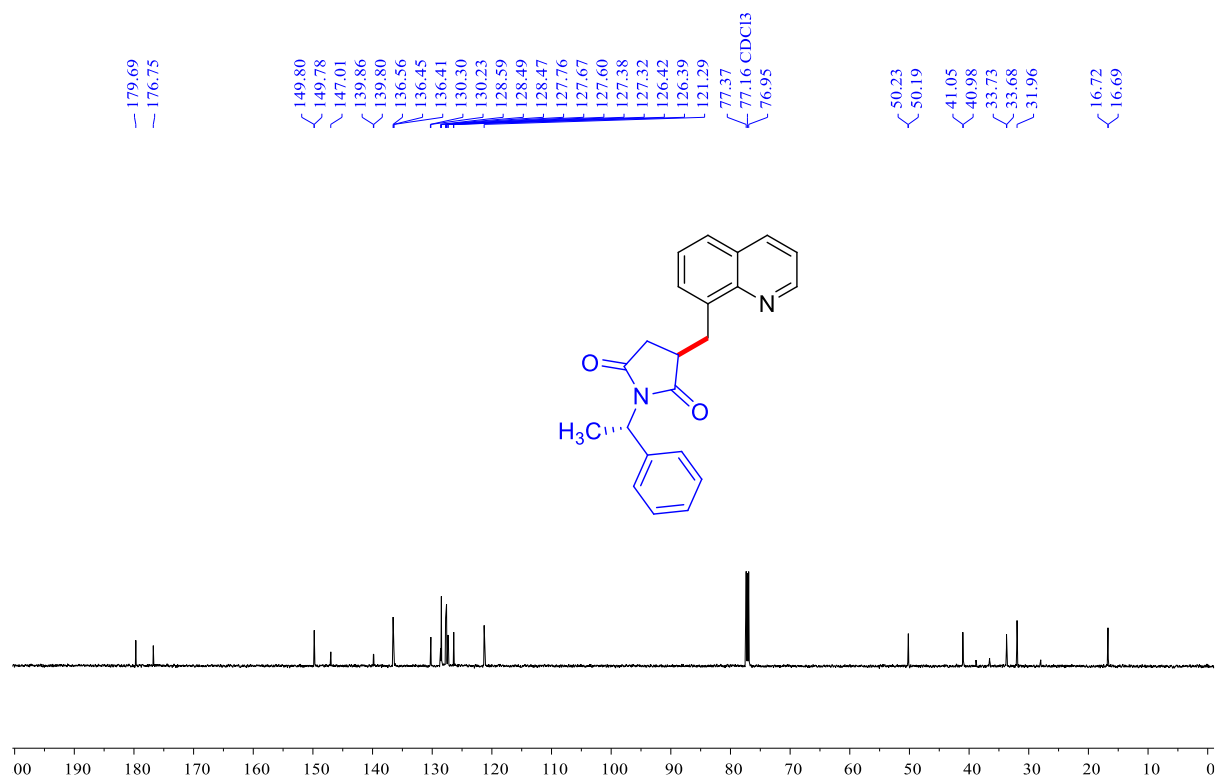

***1-(1-Phenylethyl)-3-(quinolin-8-ylmethyl)pyrrolidine-2,5-dione (Table 3, entry 3ah):***

**<sup>1</sup>H NMR**

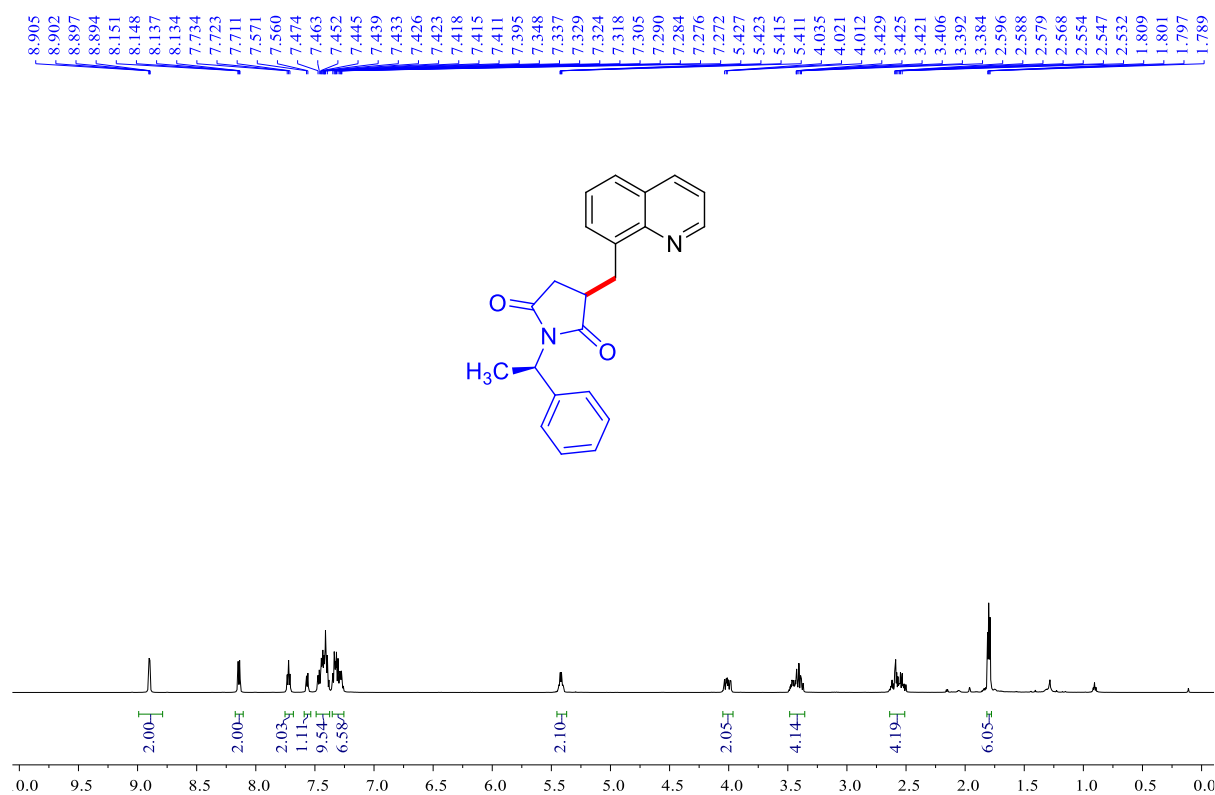

**<sup>13</sup>C NMR**

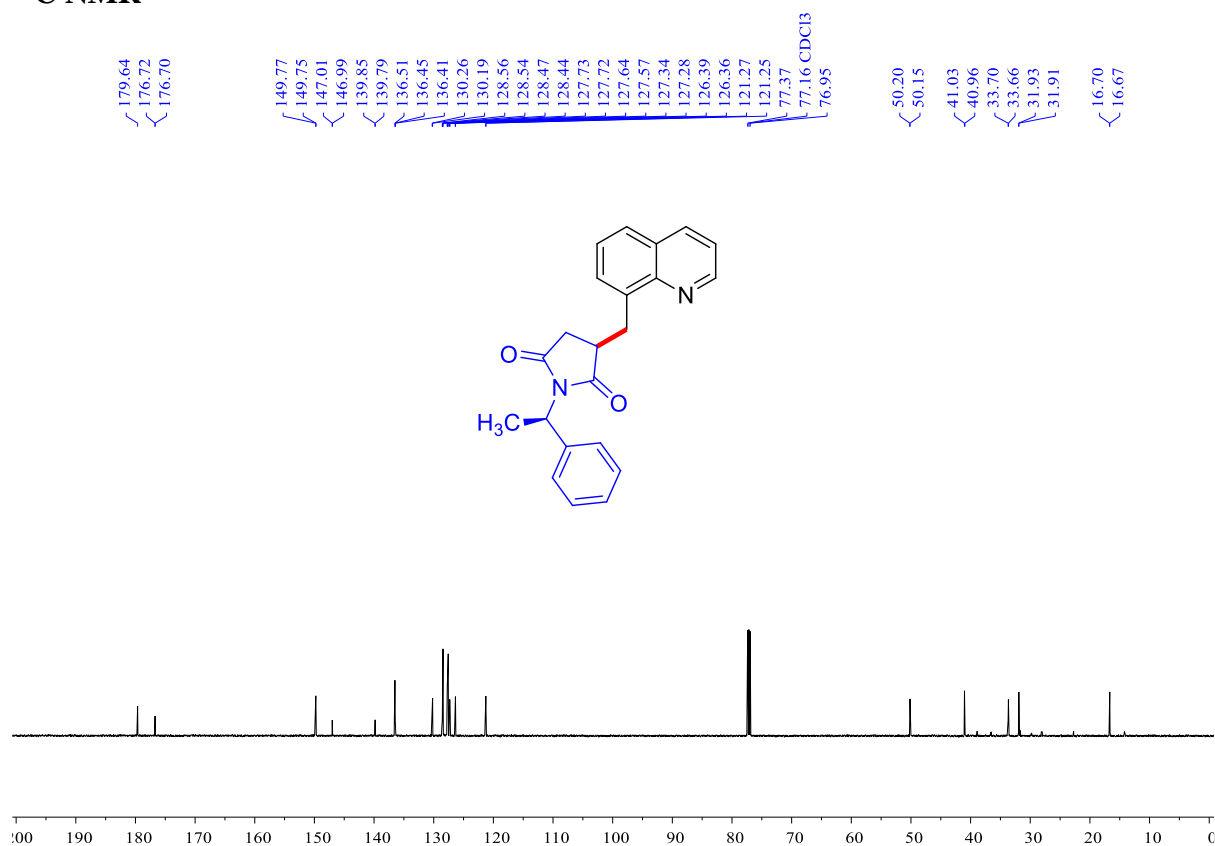



***1-(4-Methoxyphenethyl)-3-(quinolin-8-ylmethyl)pyrrolidine-2,5-dione (Table 3, entry 3ai):***

**<sup>1</sup>H NMR**

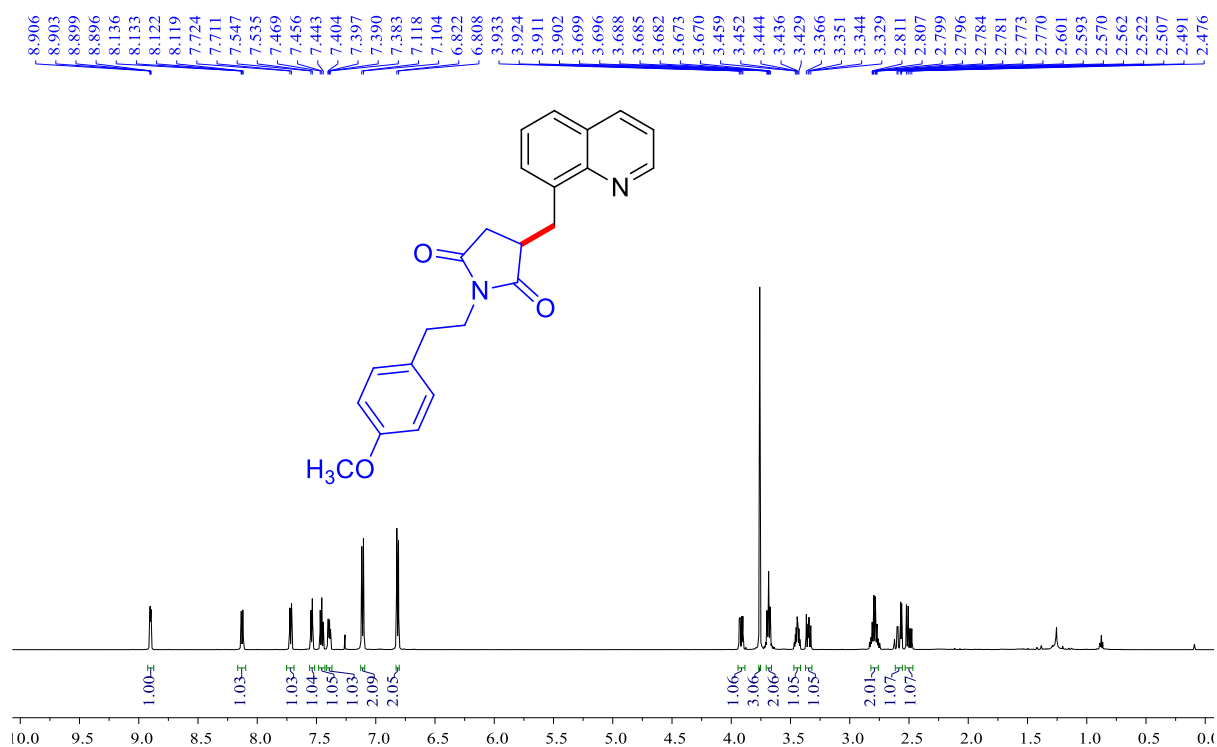

**<sup>13</sup>C NMR**

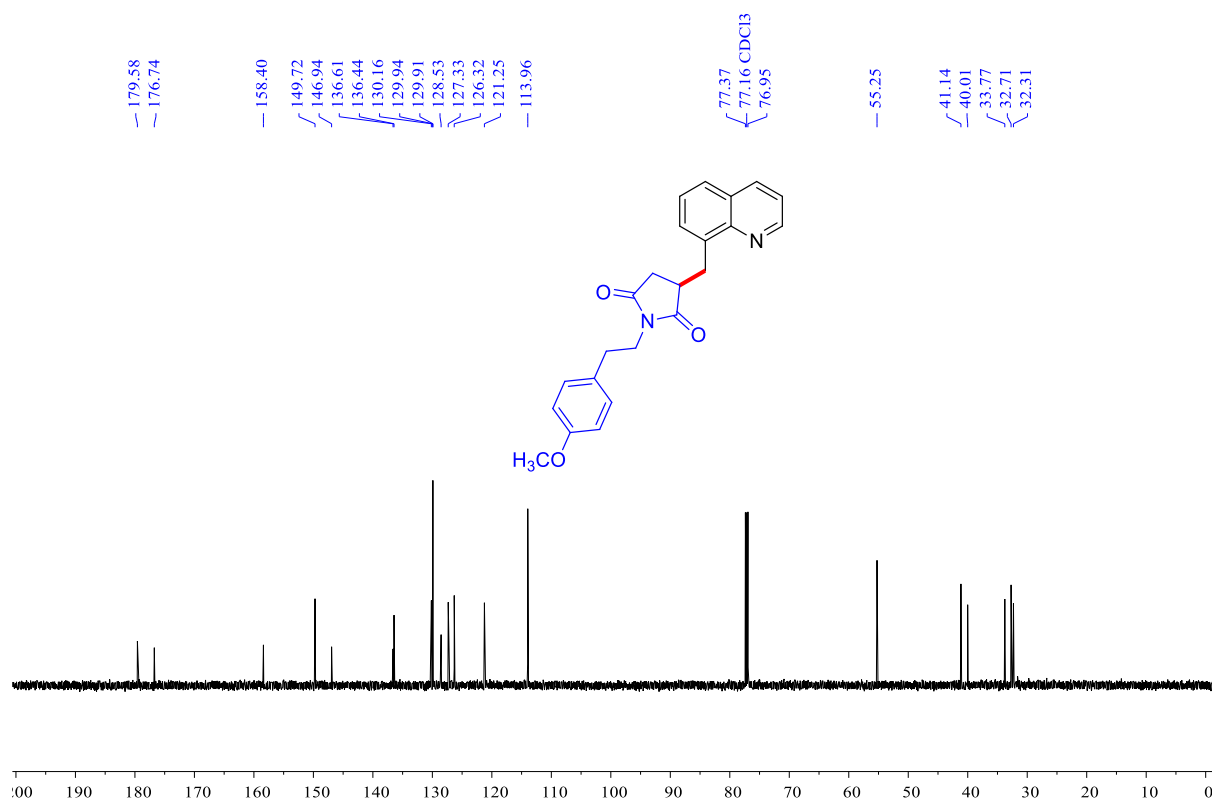

**1-Phenyl-3-(quinolin-8-ylmethyl)pyrrolidine-2,5-dione (Table 3, entry 3aj):**

**<sup>1</sup>H NMR**

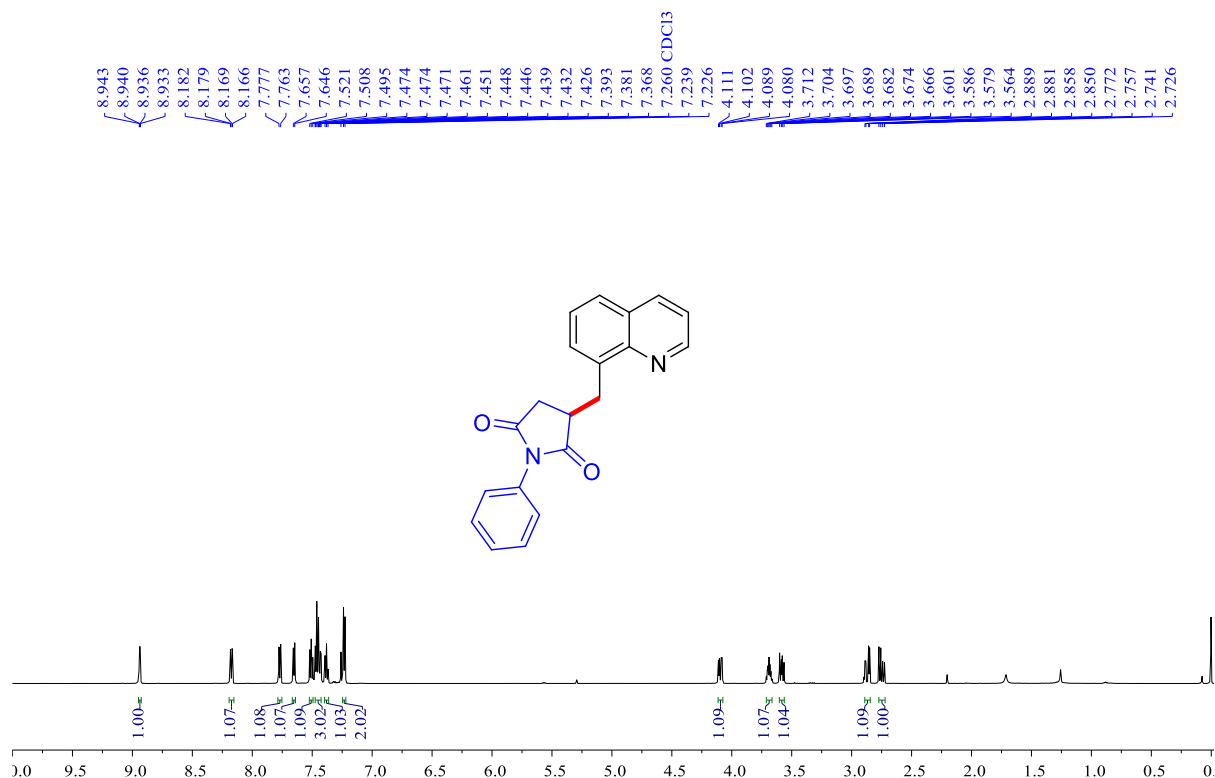

**<sup>13</sup>C NMR**

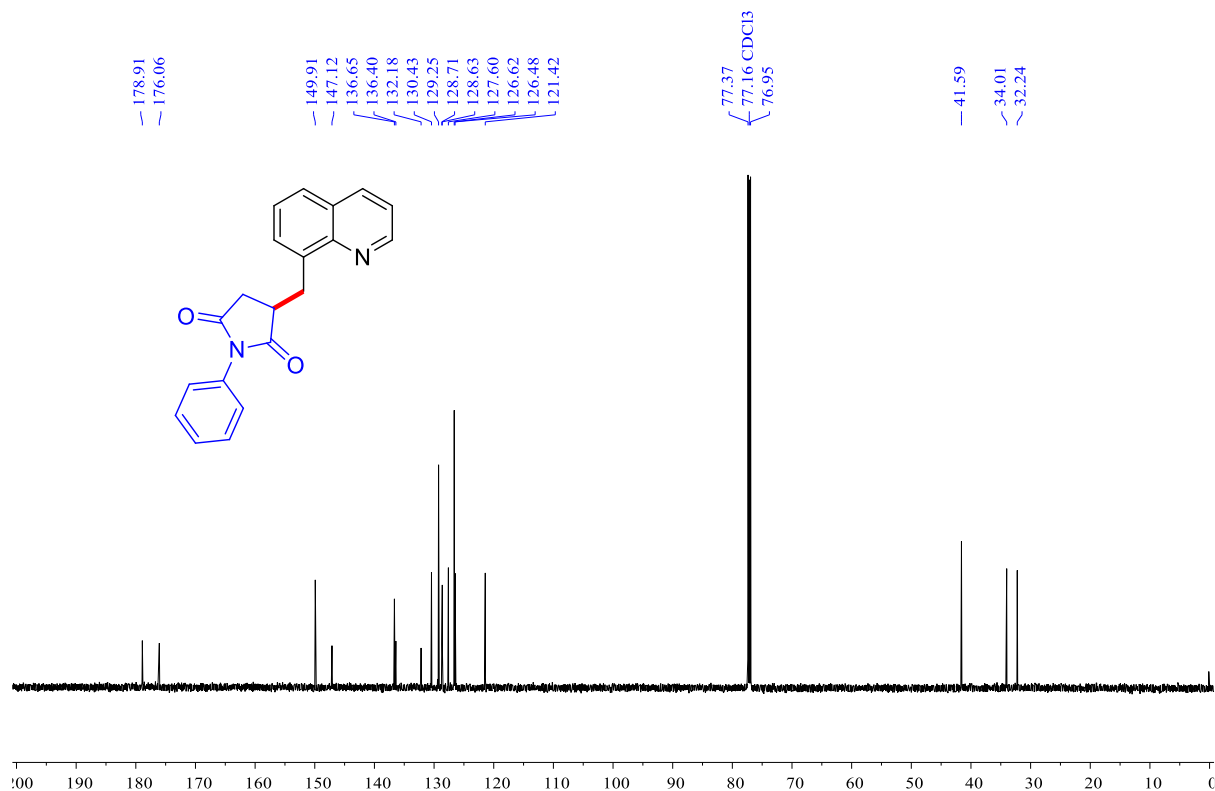

**3-(Quinolin-8-ylmethyl)-1-(o-tolyl)pyrrolidine-2,5-dione (Table 3, entry 3ak):**

**<sup>1</sup>H NMR**

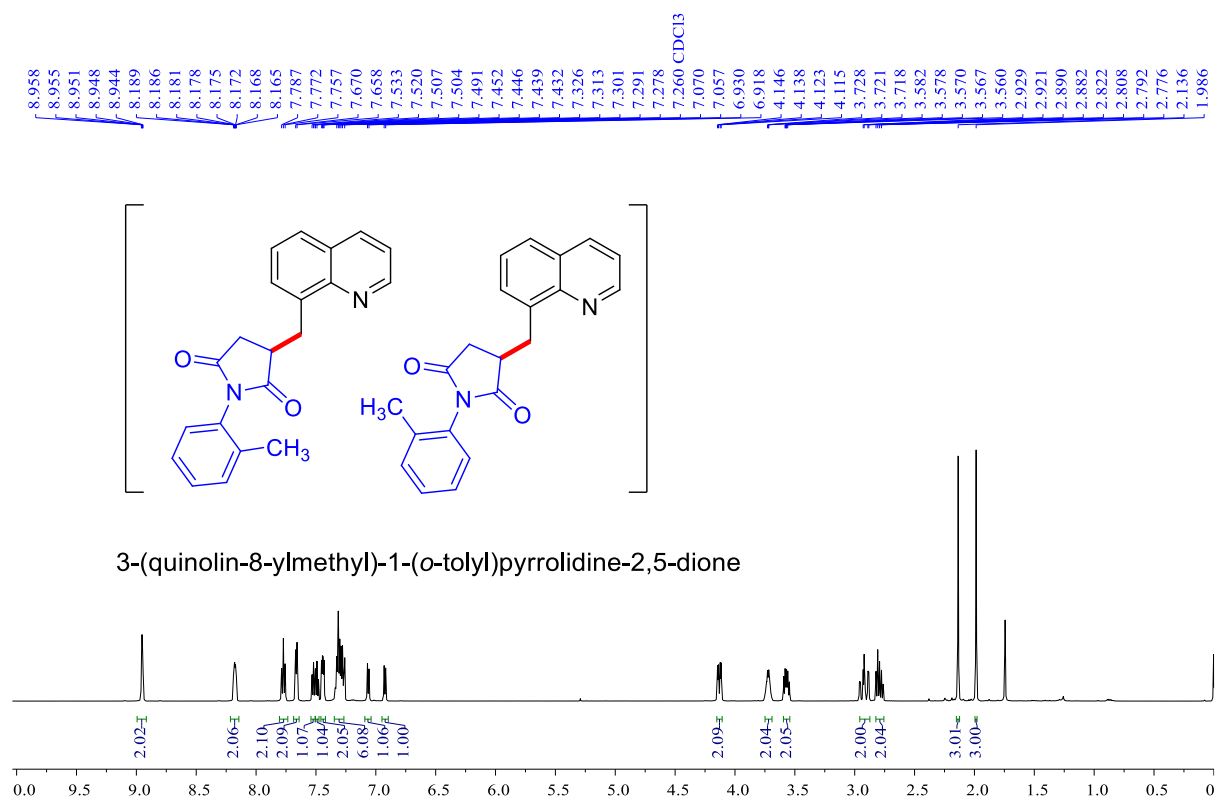

**<sup>13</sup>C NMR**

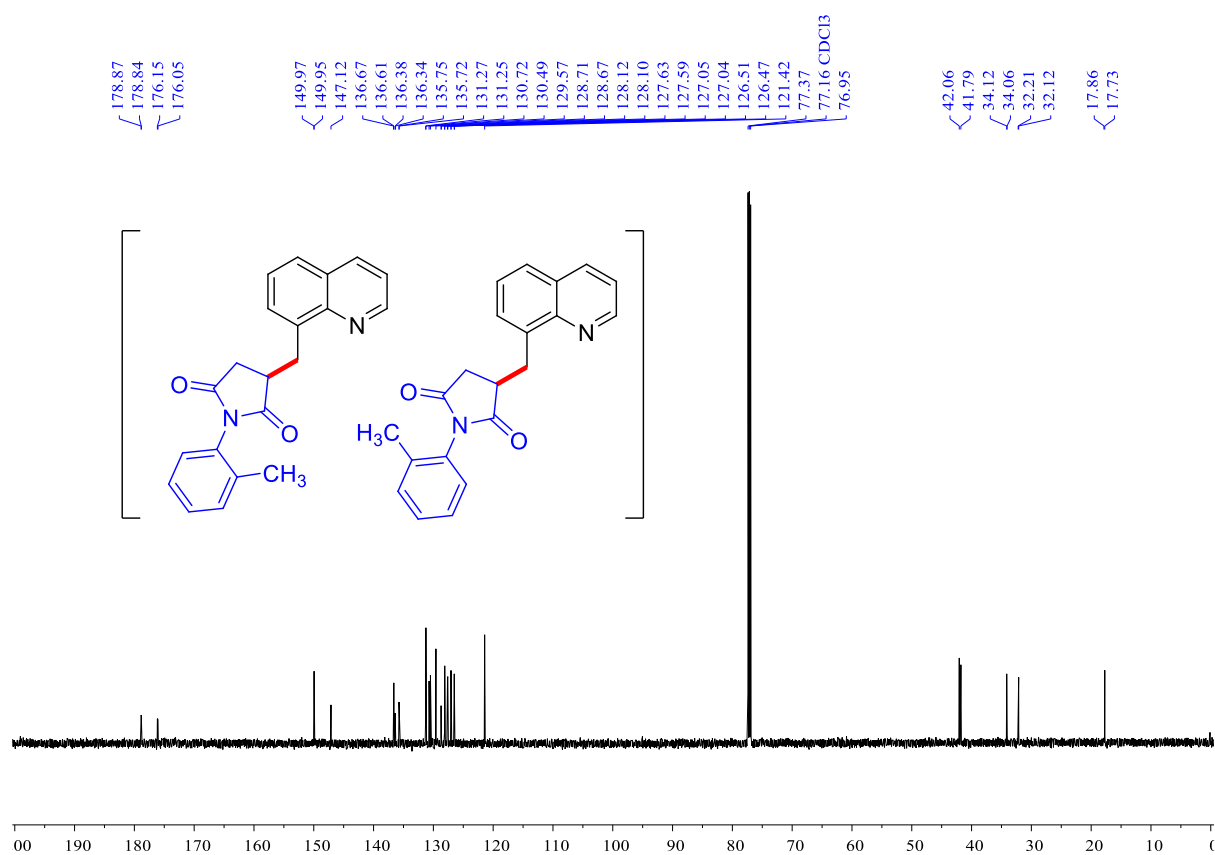

**1-(3-Chlorophenyl)-3-(quinolin-8-ylmethyl)pyrrolidine-2,5-dione (Table 3, entry 3a):**

**<sup>1</sup>H NMR**

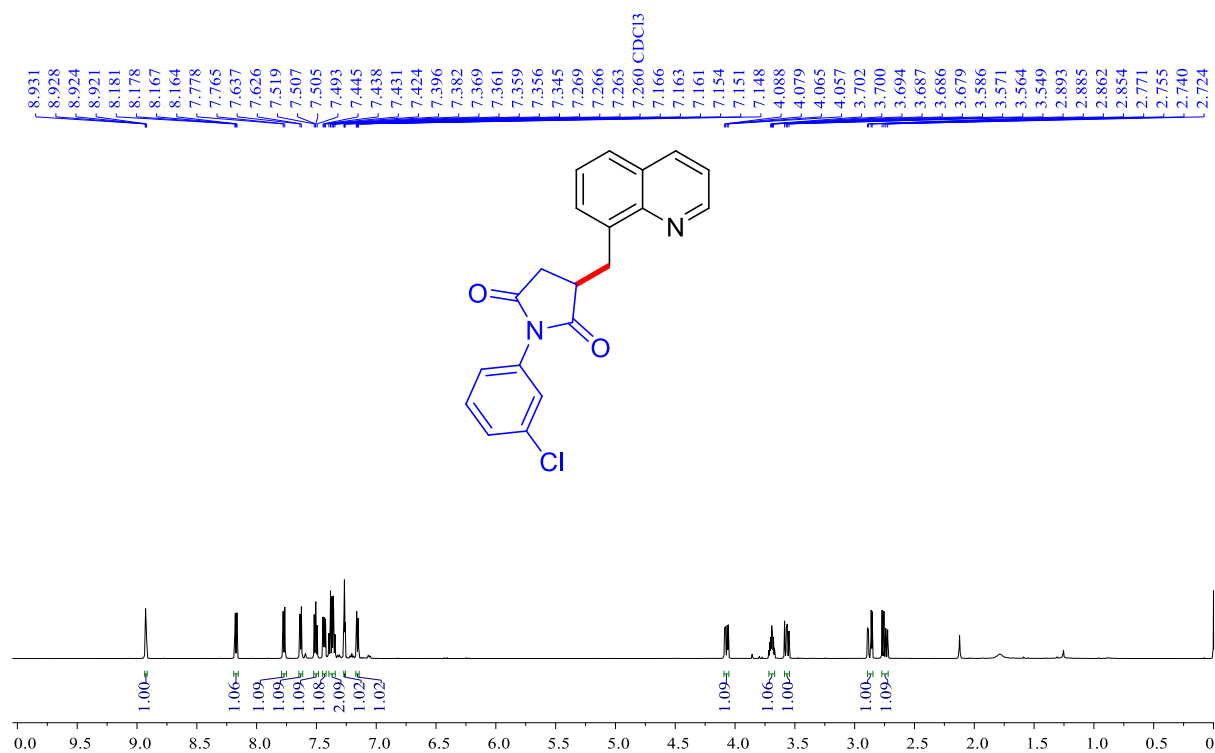

**<sup>13</sup>C NMR**

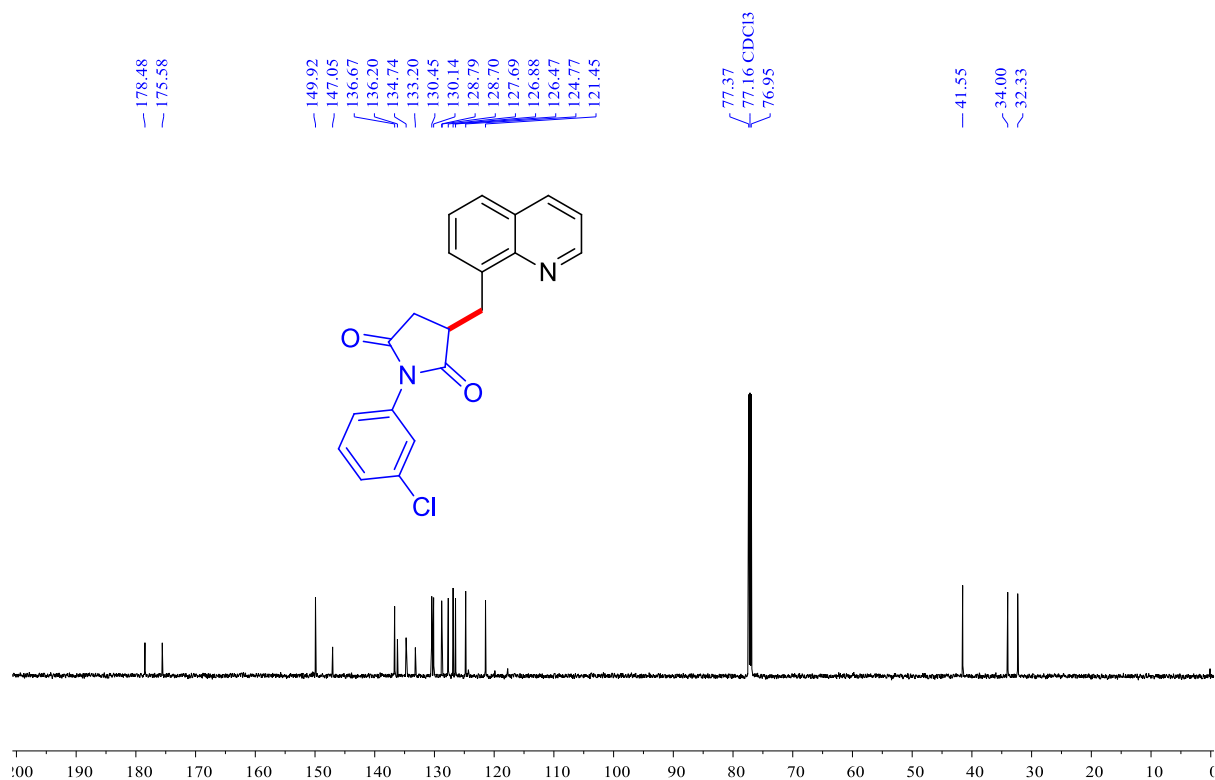

**1-(3-Nitrophenyl)-3-(quinolin-8-ylmethyl)pyrrolidine-2,5-dione (Table 3, entry 3am):**

**<sup>1</sup>H NMR**

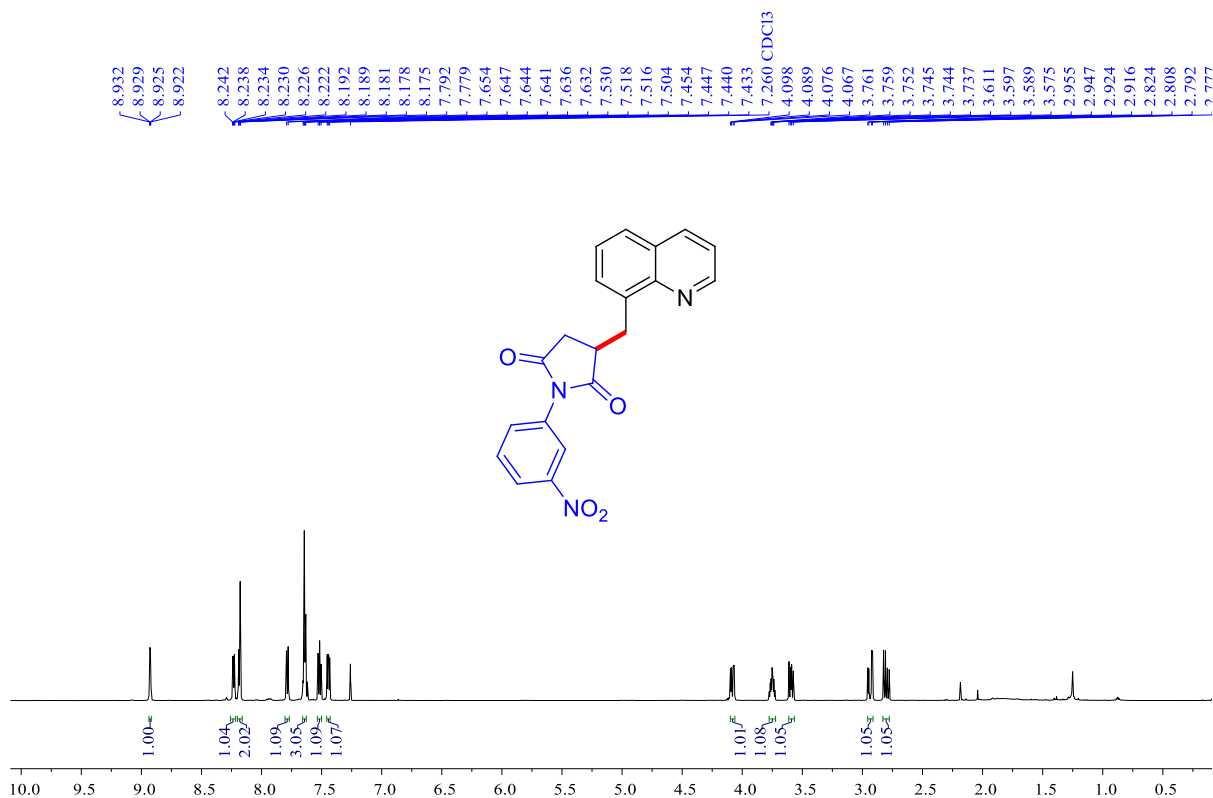

**<sup>13</sup>C NMR**

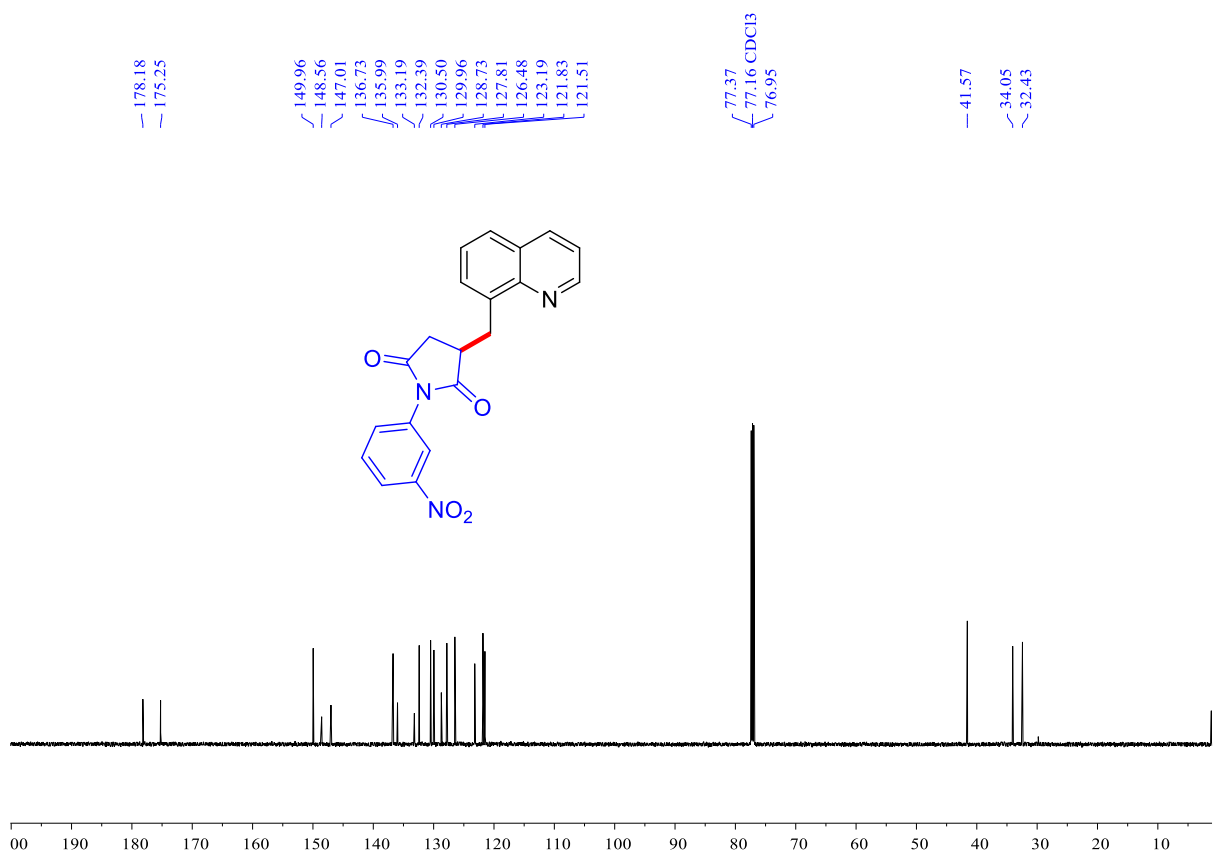

***1-(3,5-Bis(trifluoromethyl)phenyl)-3-(quinolin-8-ylmethyl)pyrrolidine-2,5-dione (Table 3, entry 3an):***

**<sup>1</sup>H NMR**

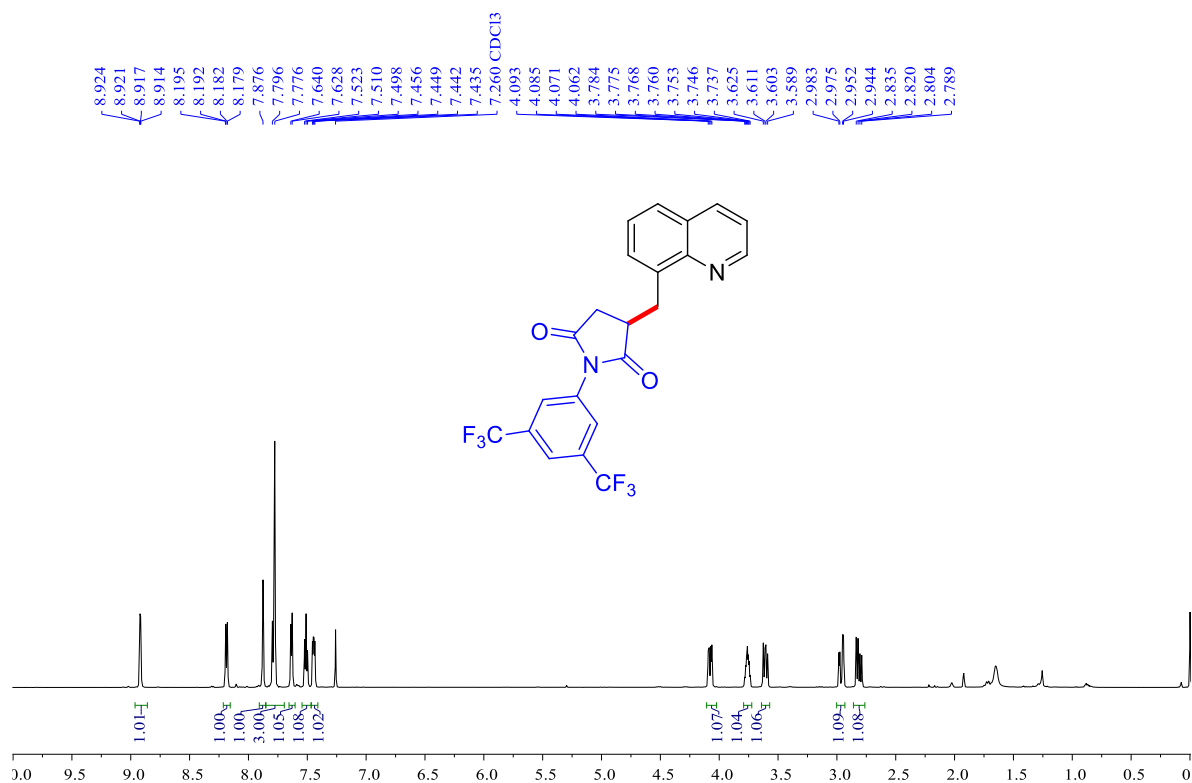

**<sup>13</sup>C NMR**

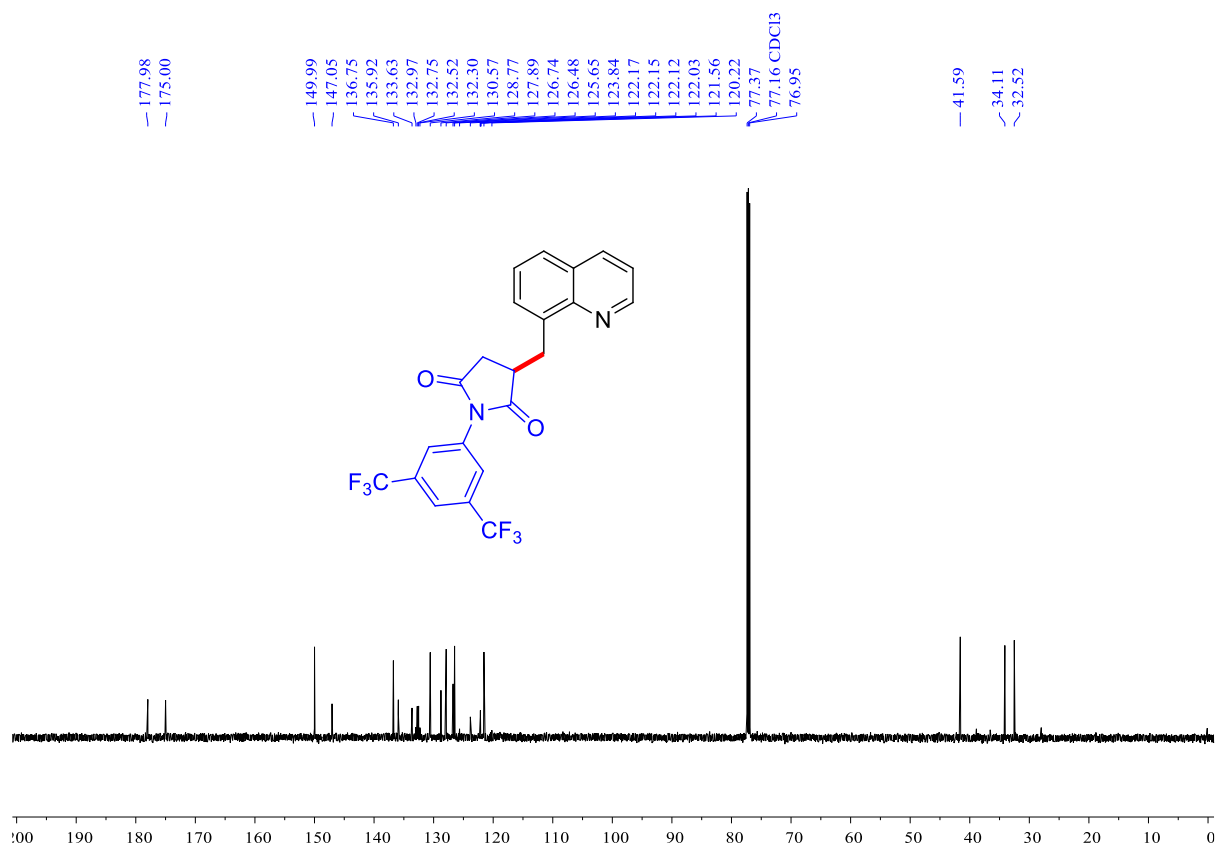

**1-(4-Methoxyphenyl)-3-(quinolin-8-ylmethyl)pyrrolidine-2,5-dione (Table 3, entry 3ao):**

**<sup>1</sup>H NMR**

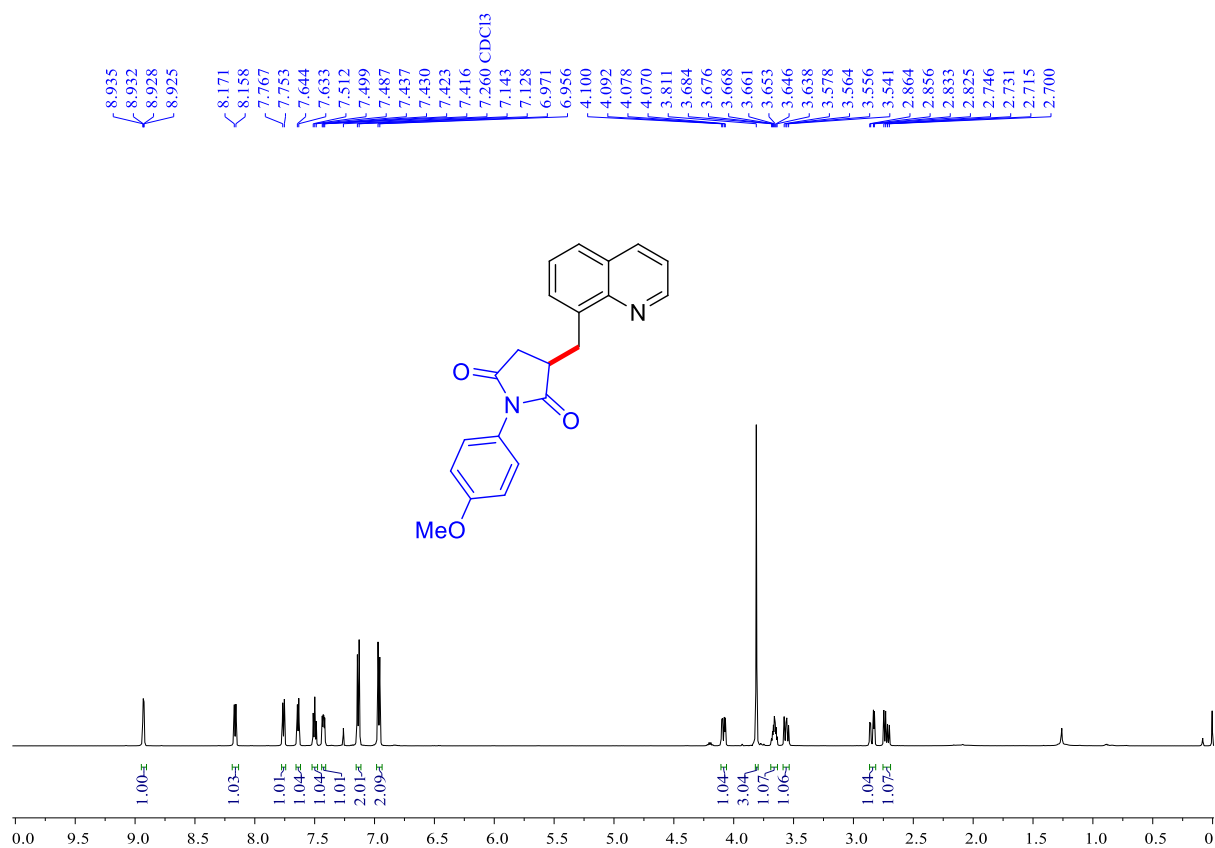

**<sup>13</sup>C NMR**

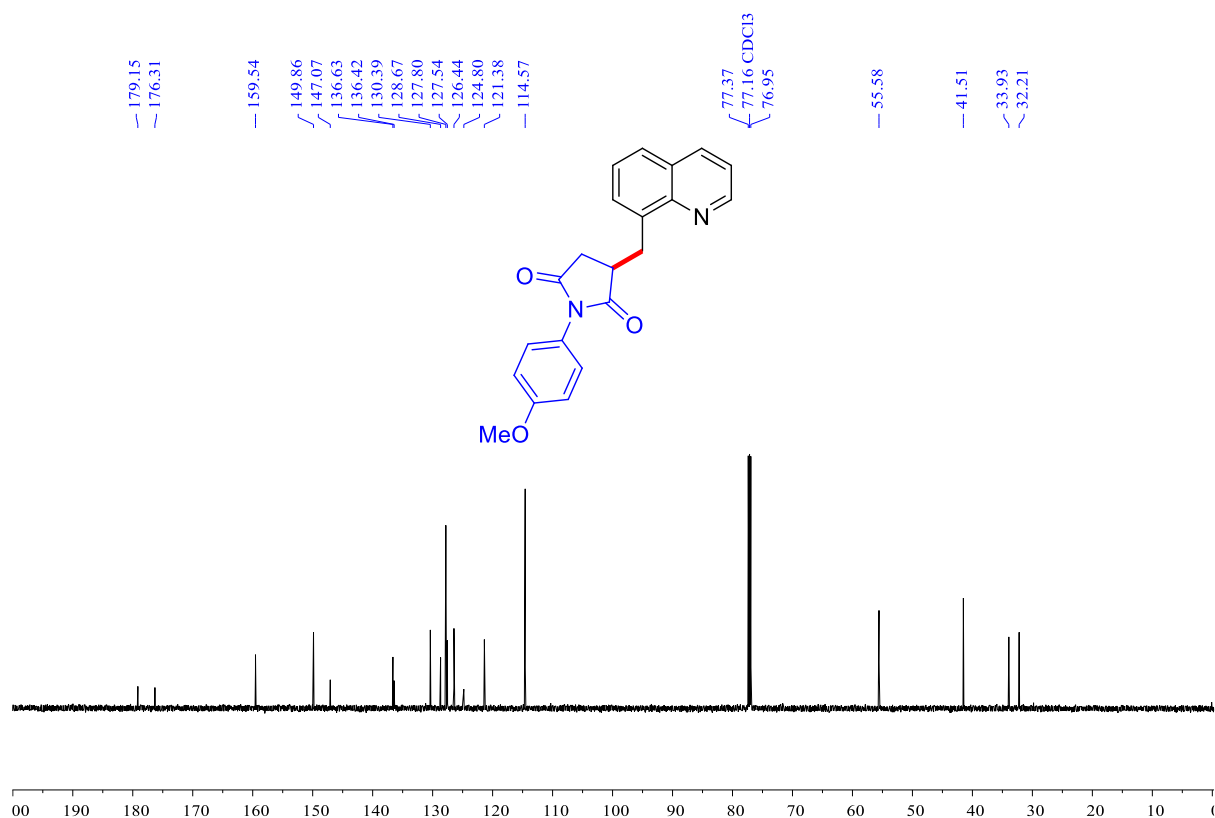

***1-(4-Fluorophenyl)-3-(quinolin-8-ylmethyl)pyrrolidine-2,5-dione (Table 3, entry 3ap):***

**<sup>1</sup>H NMR**

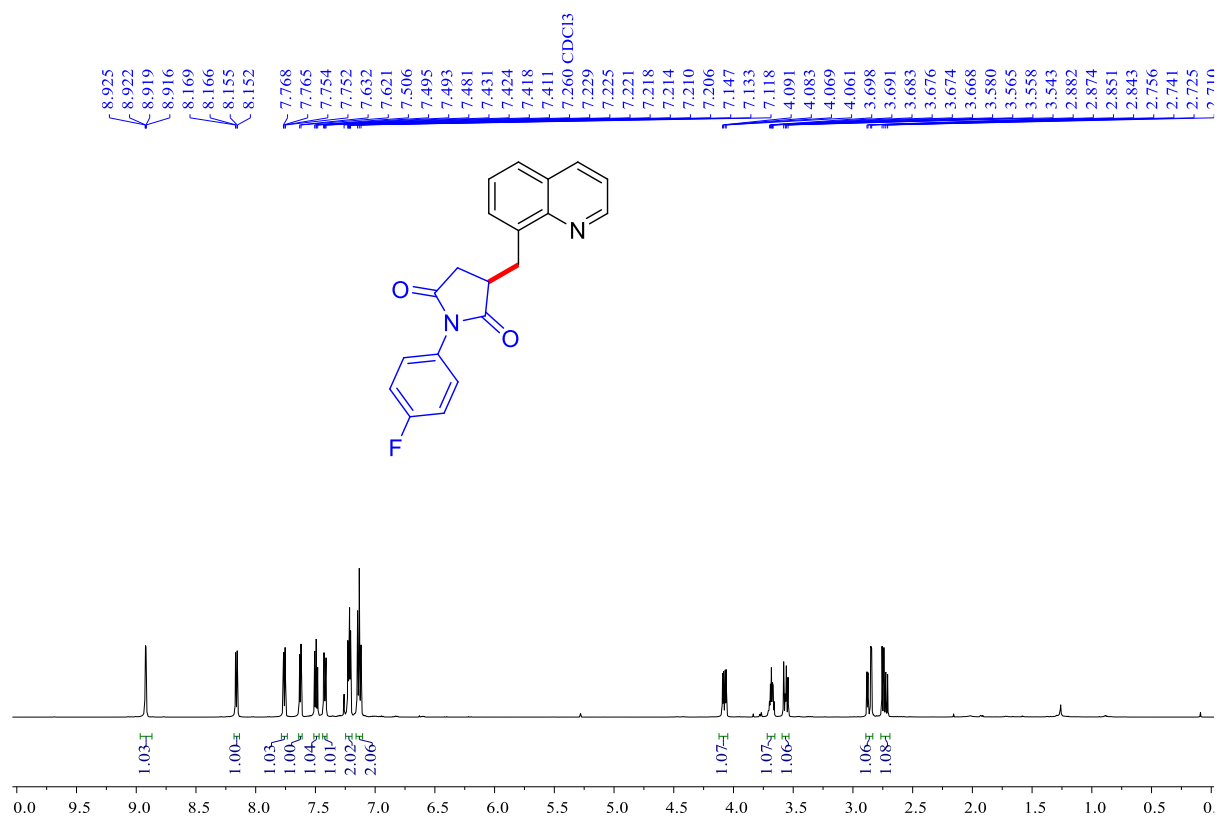

**<sup>13</sup>C NMR**

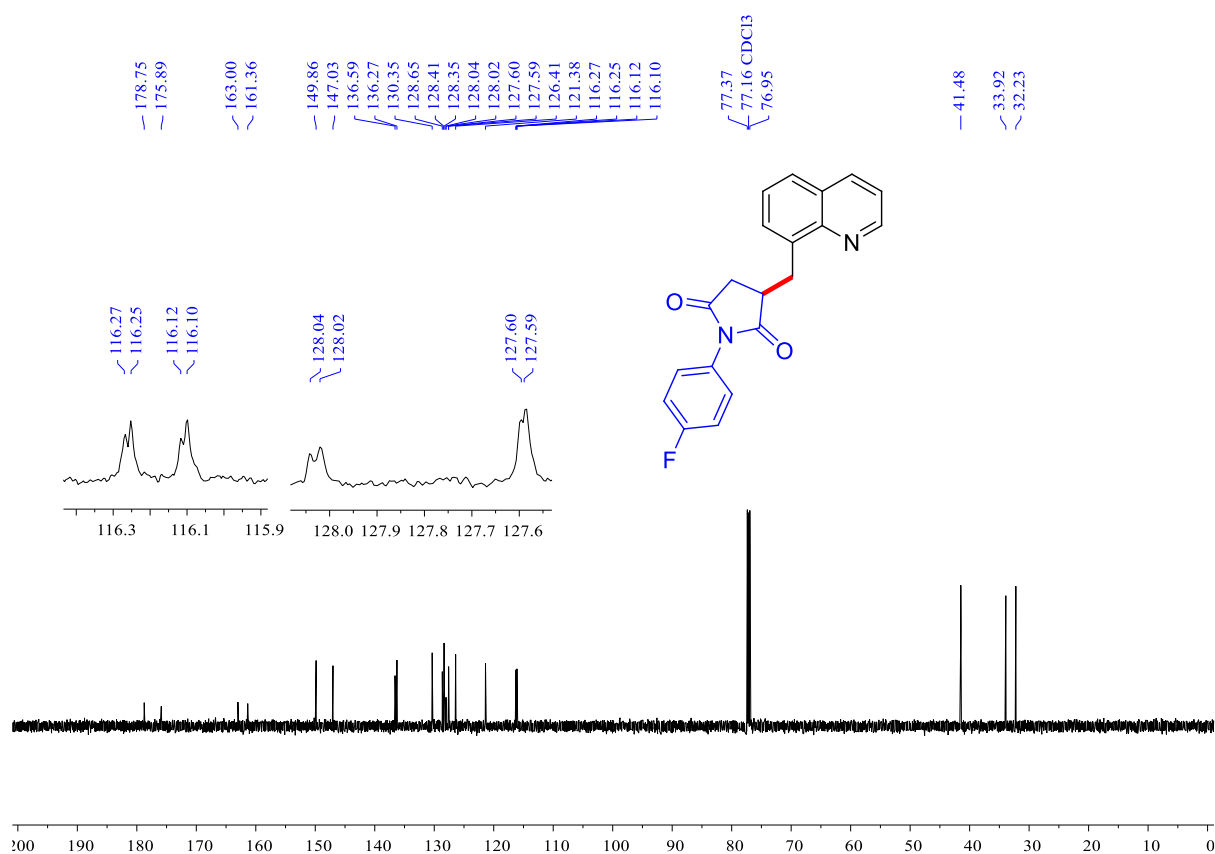



**1-(4-Chlorophenyl)-3-(quinolin-8-ylmethyl)pyrrolidine-2,5-dione (Table 3, entry 3aq):**

**$^1\text{H}$  NMR**

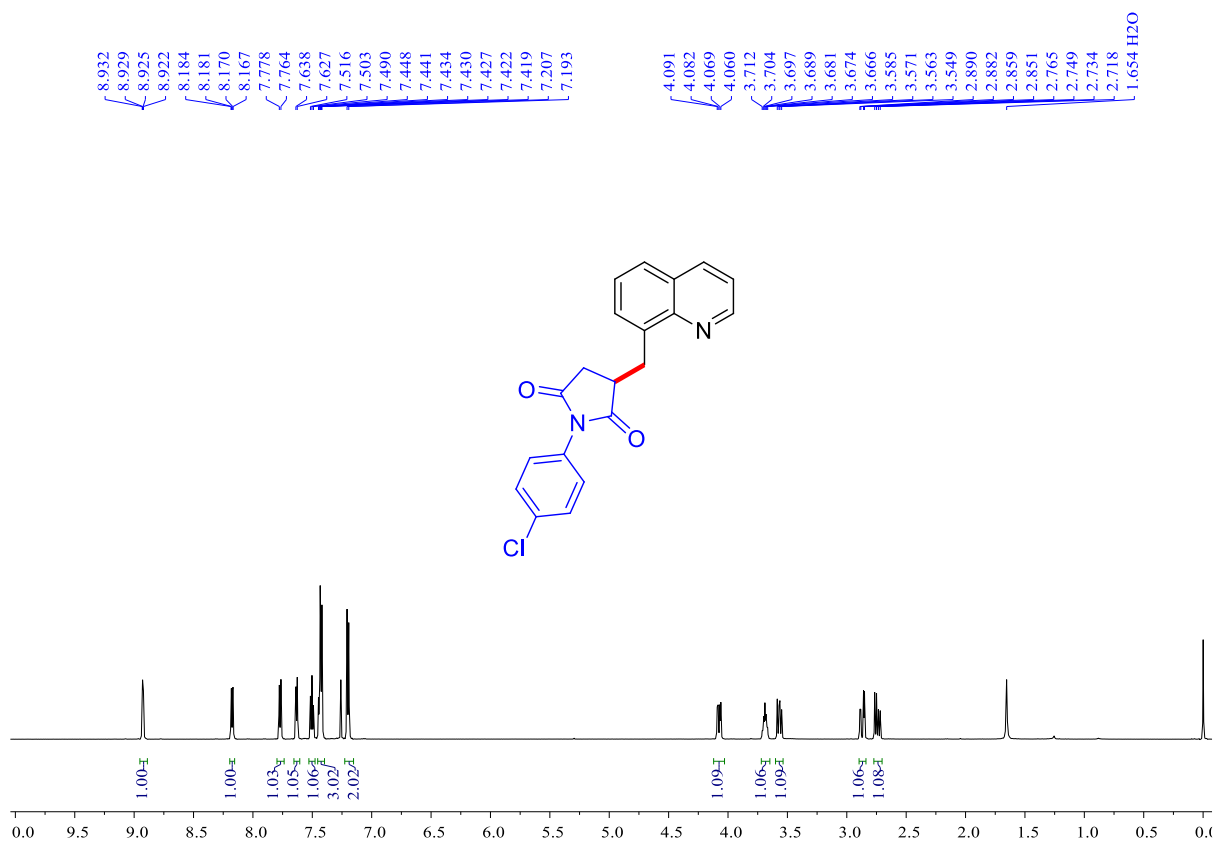

**$^{13}\text{C}$  NMR**

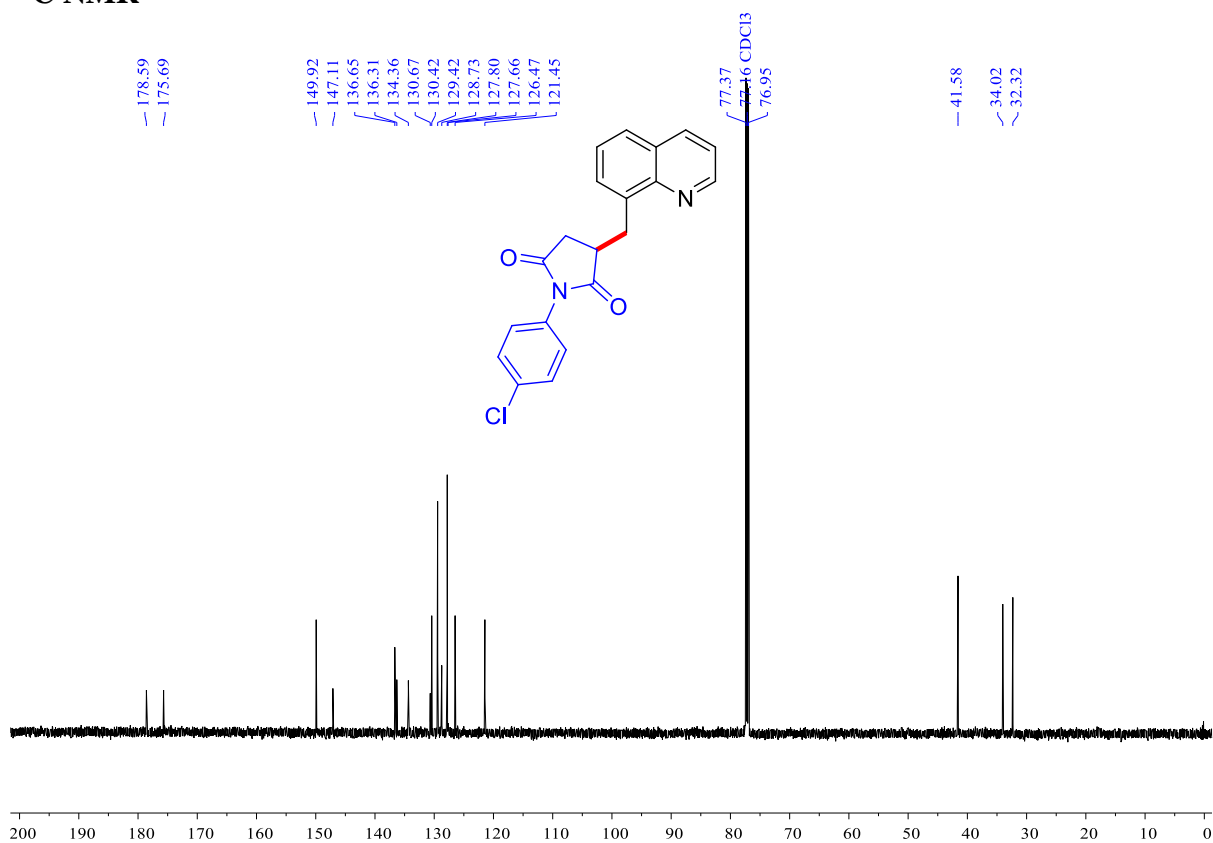

**1-(4-Bromophenyl)-3-(quinolin-8-ylmethyl)pyrrolidine-2,5-dione (Table 3, entry 3ar):**

**<sup>1</sup>H NMR**

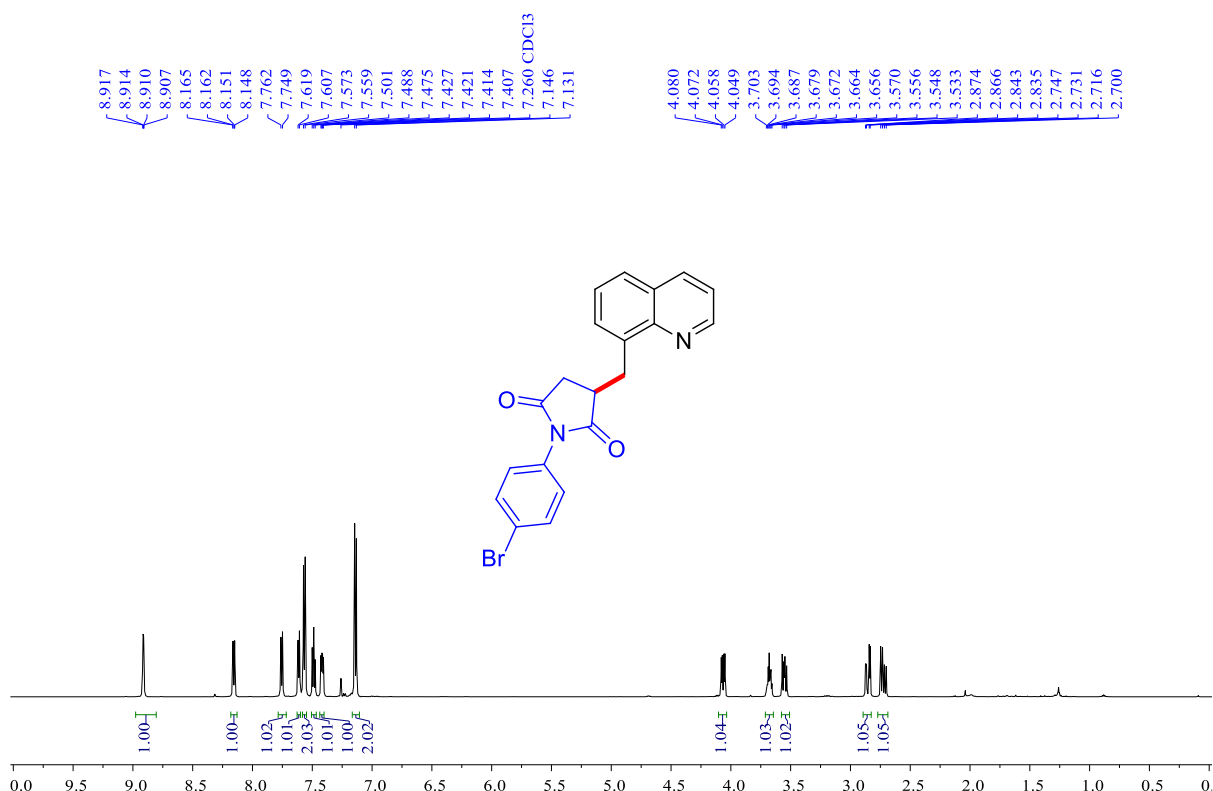

**<sup>13</sup>C NMR**

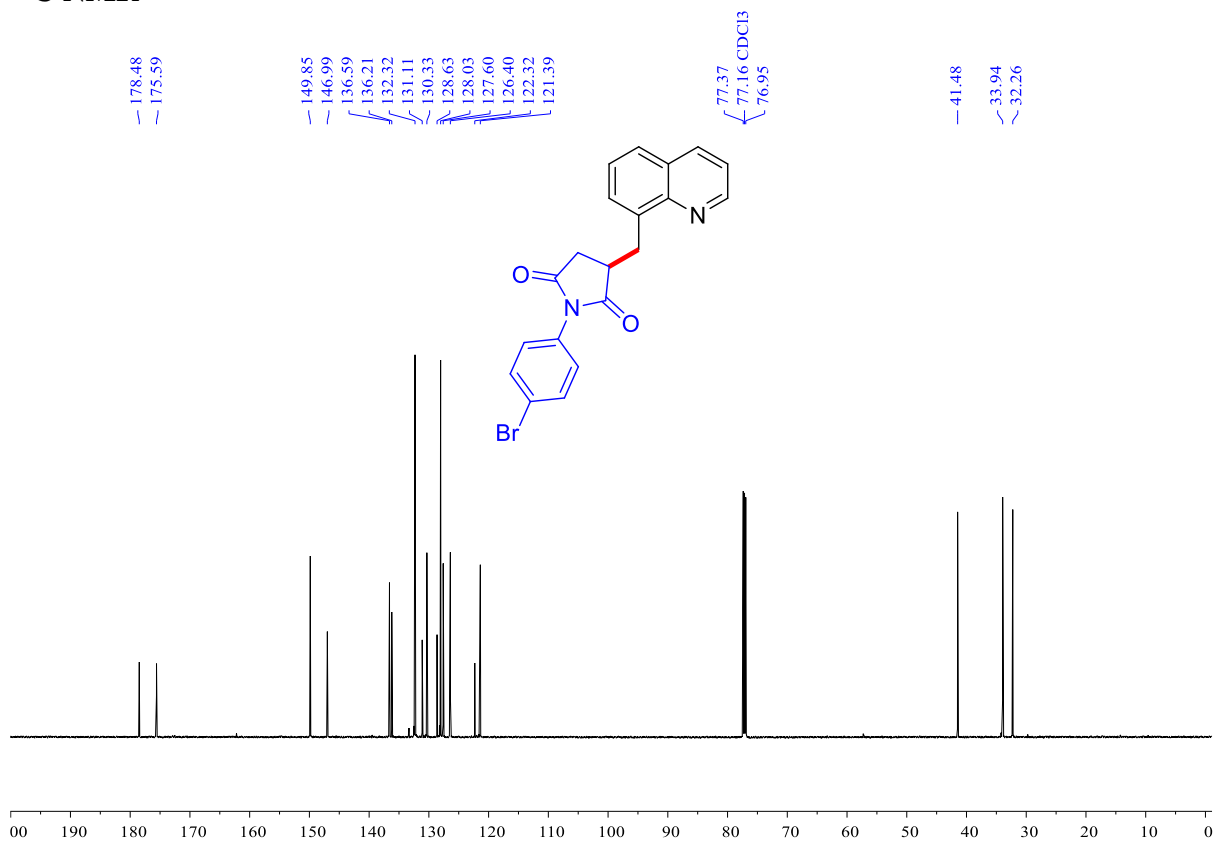

**1-(4-Iodophenyl)-3-(quinolin-8-ylmethyl)pyrrolidine-2,5-dione (Table 3, entry 3as):**

**<sup>1</sup>H NMR**

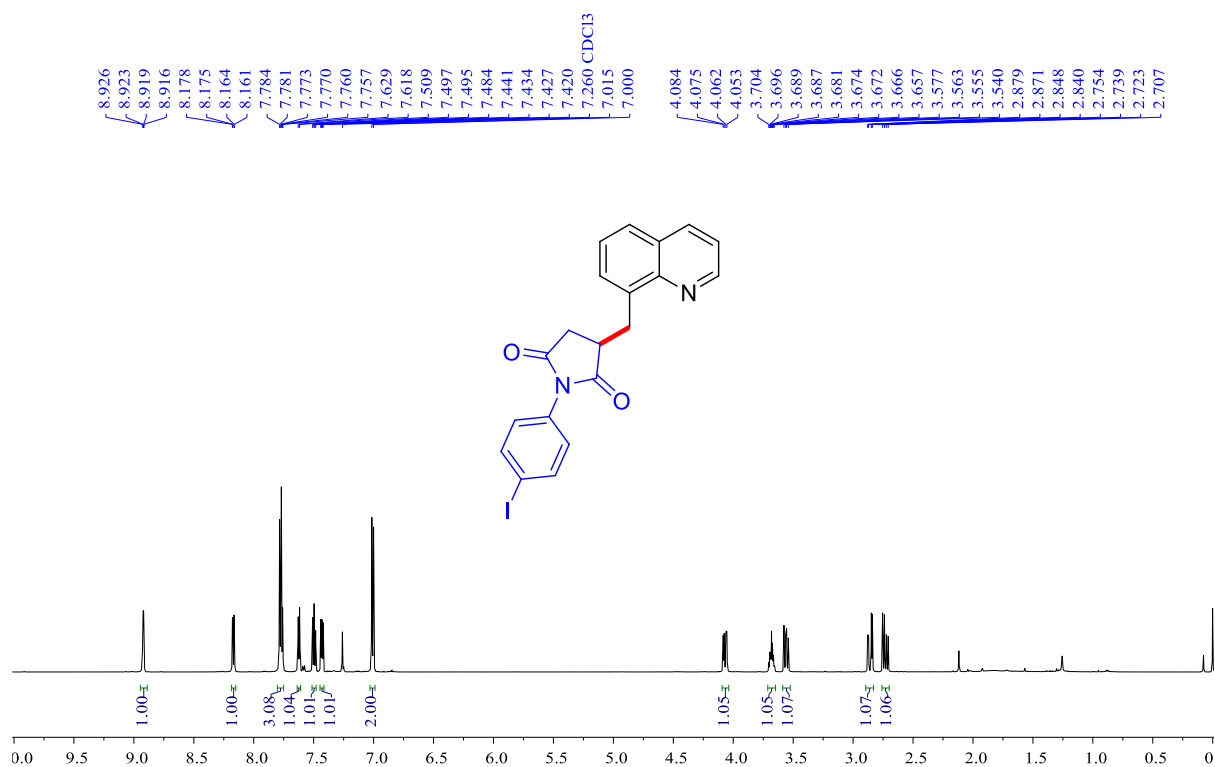

**<sup>13</sup>C NMR**

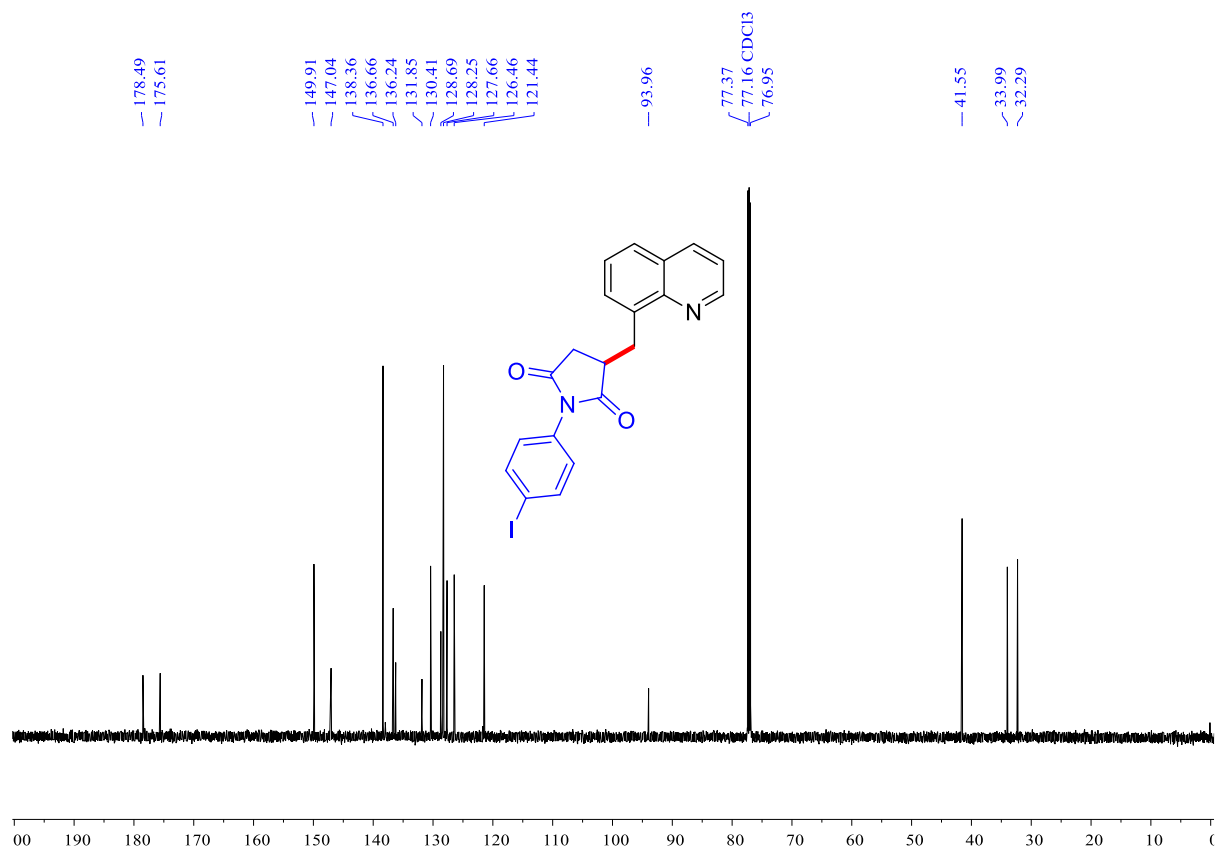

**1-(4-Nitrophenyl)-3-(quinolin-8-ylmethyl)pyrrolidine-2,5-dione (Table 3, entry 3at):**

**<sup>1</sup>H NMR**

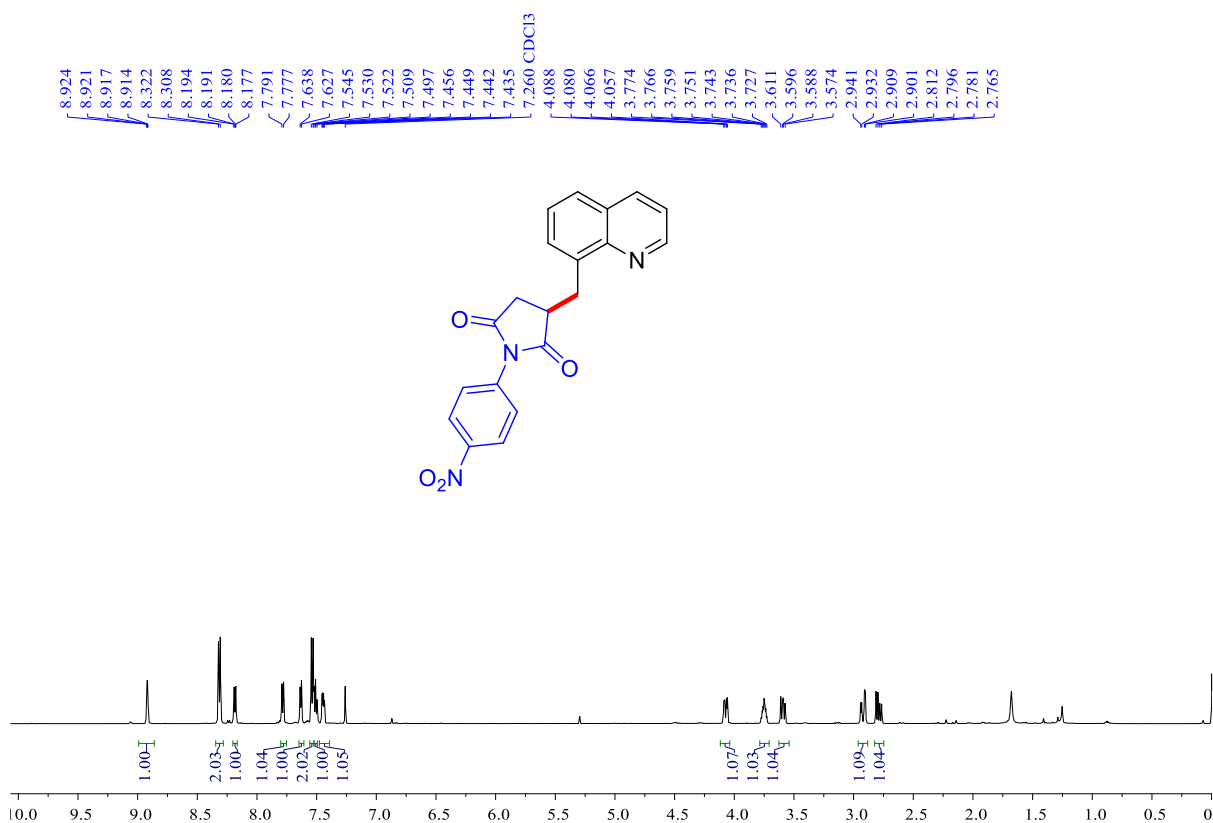

**<sup>13</sup>C NMR**

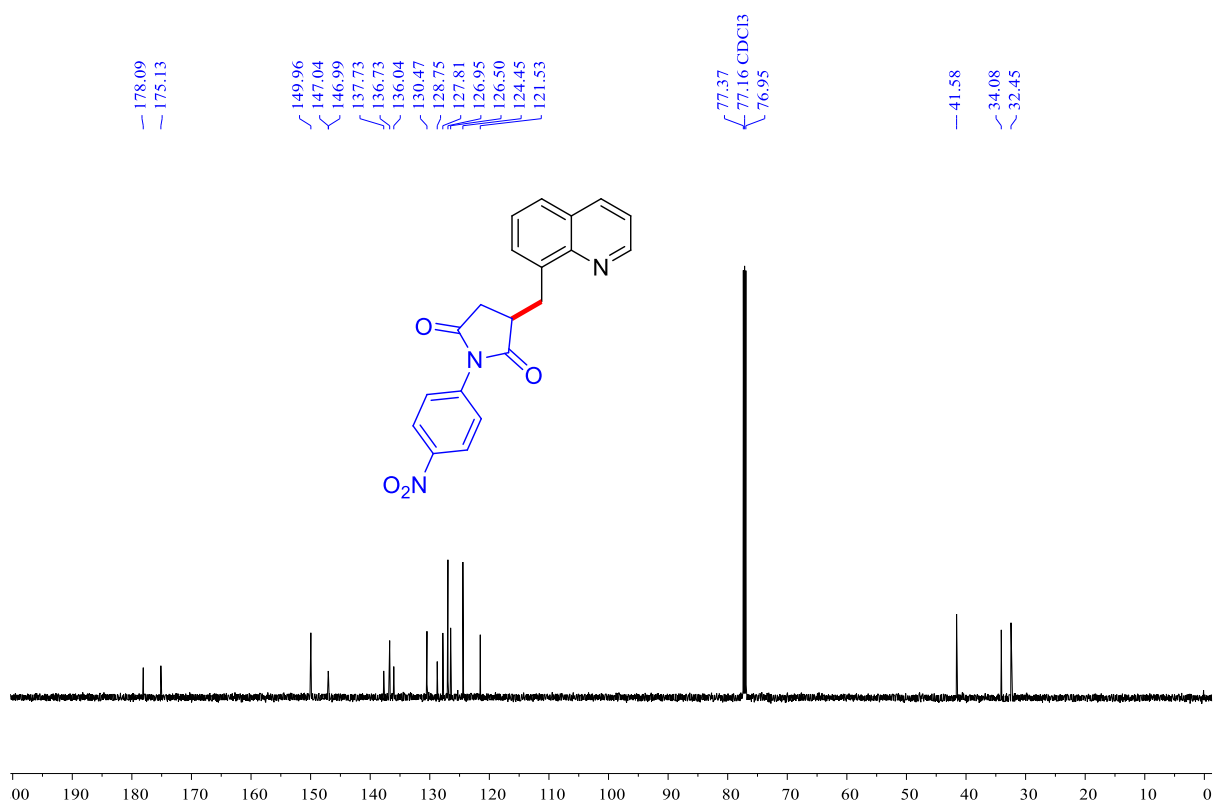

**3-(quinolin-8-ylmethyl)pyrrolidine-2,5-dione (Table 3, entry 3au):**

**<sup>1</sup>H NMR**

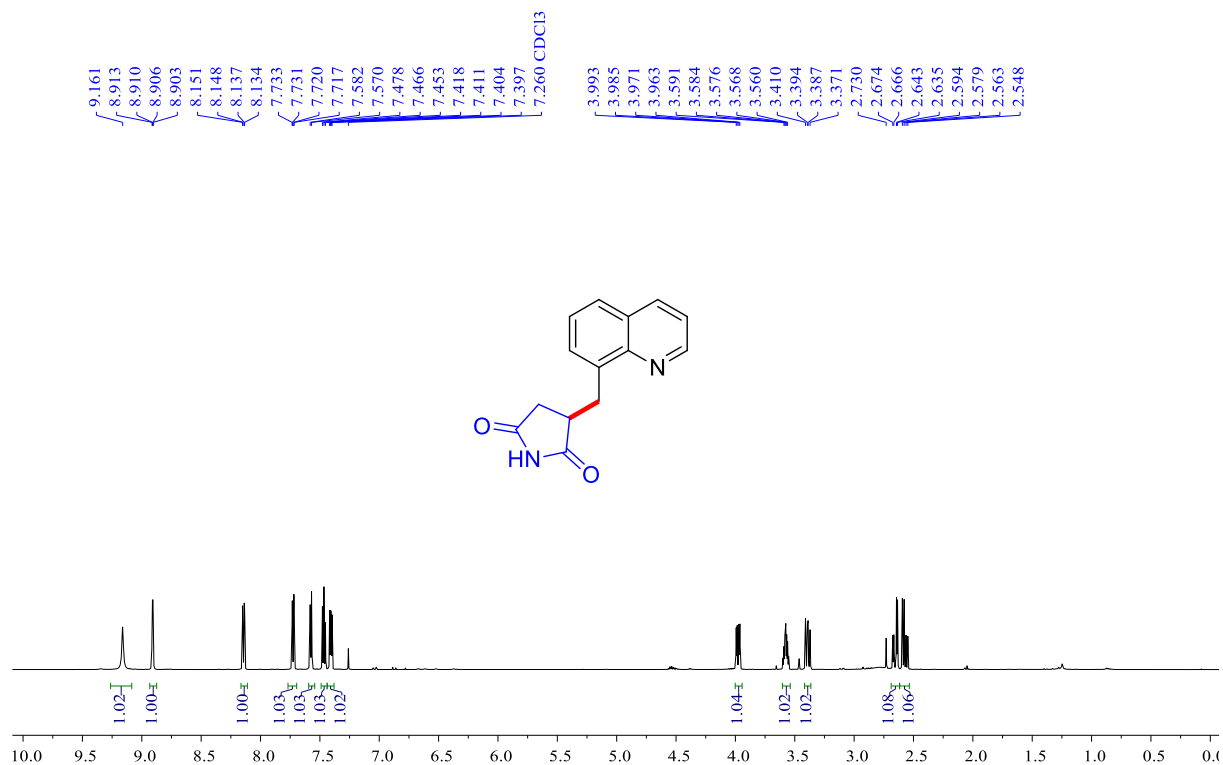

**<sup>13</sup>C NMR**

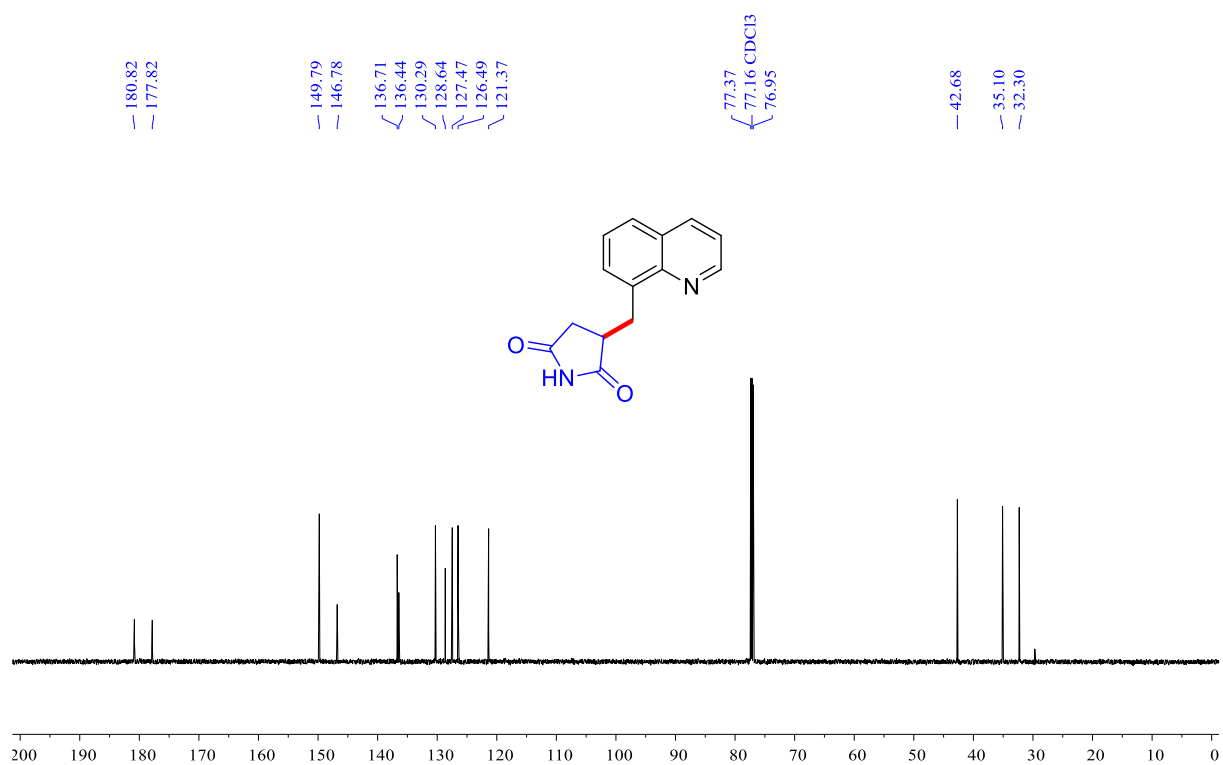

**1-(2-(2,5-Dioxo-3-(quinolin-8-ylmethyl)pyrrolidin-1-yl)ethyl)-1H-pyrrole-2,5-dione (Table 3, entry 3av<sub>1</sub>):**

**<sup>1</sup>H NMR**

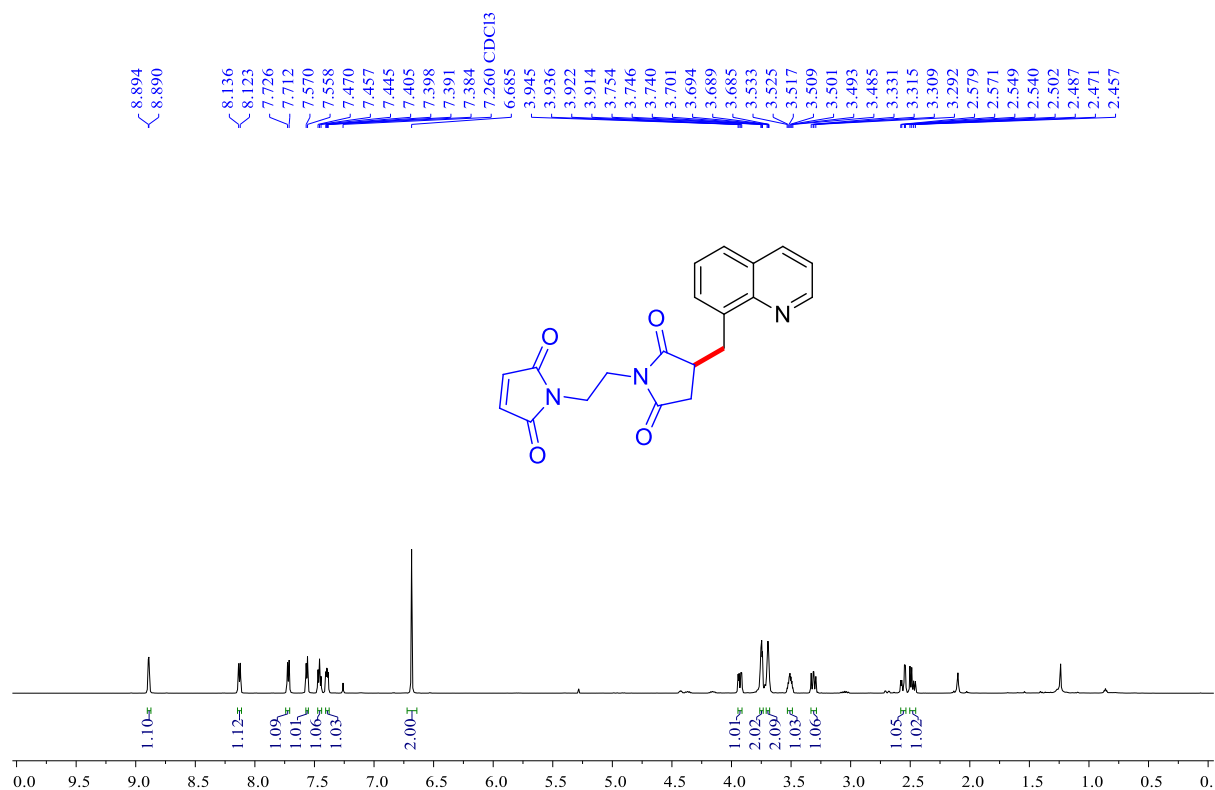

**<sup>13</sup>C NMR**

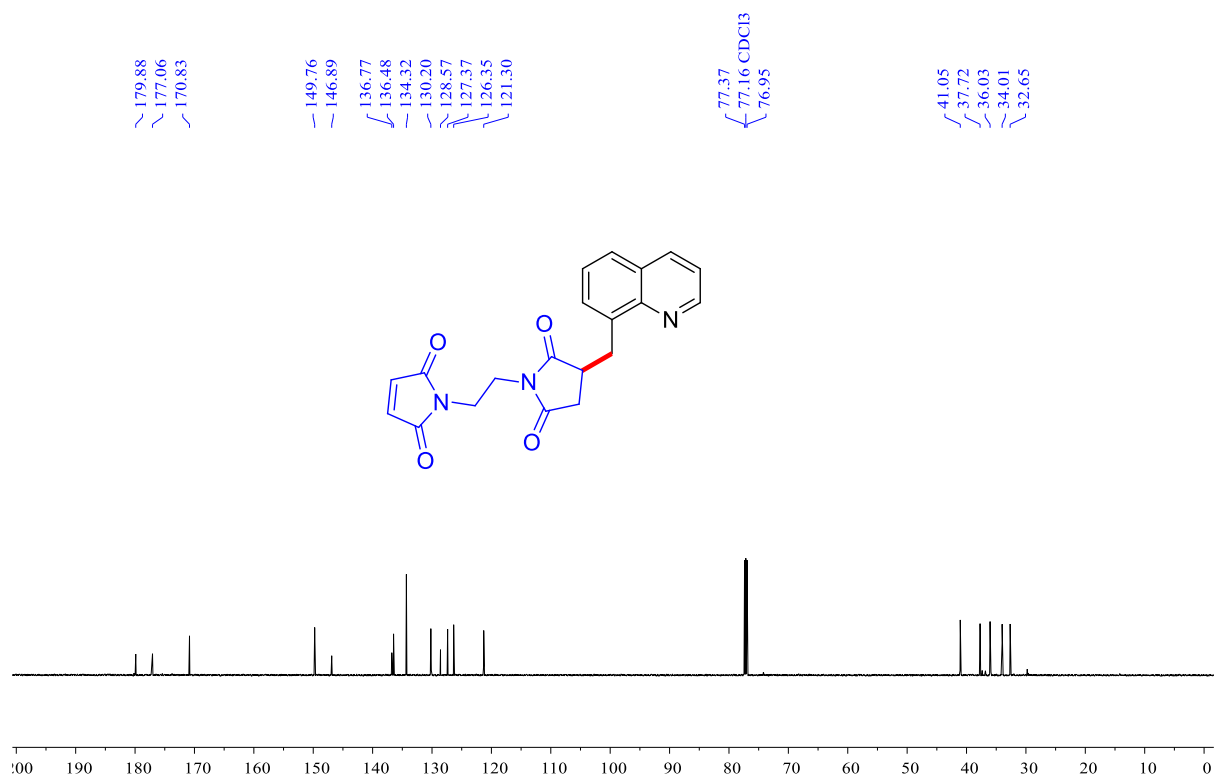

**1,1'-(ethane-1,2-diyl)bis(3-(quinolin-8-ylmethyl)pyrrolidine-2,5-dione) (Table 3, entry 3av<sub>2</sub>):**

**<sup>1</sup>H NMR**

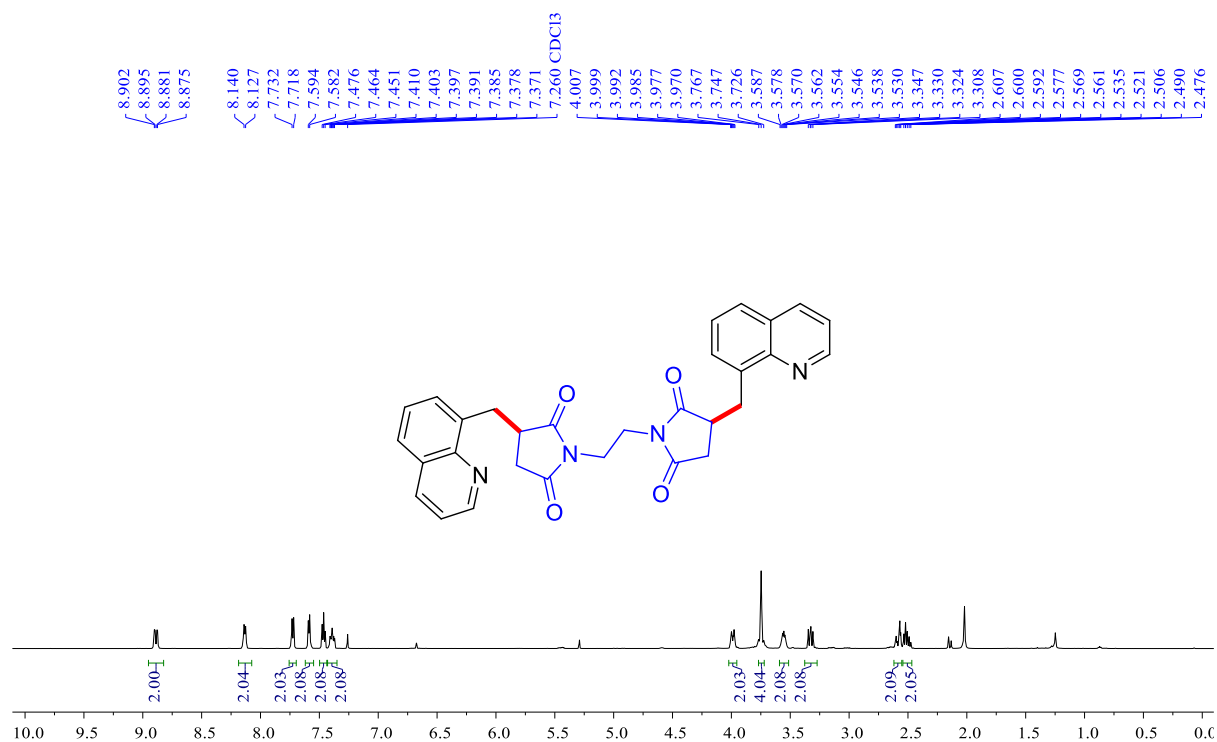

**<sup>13</sup>C NMR**

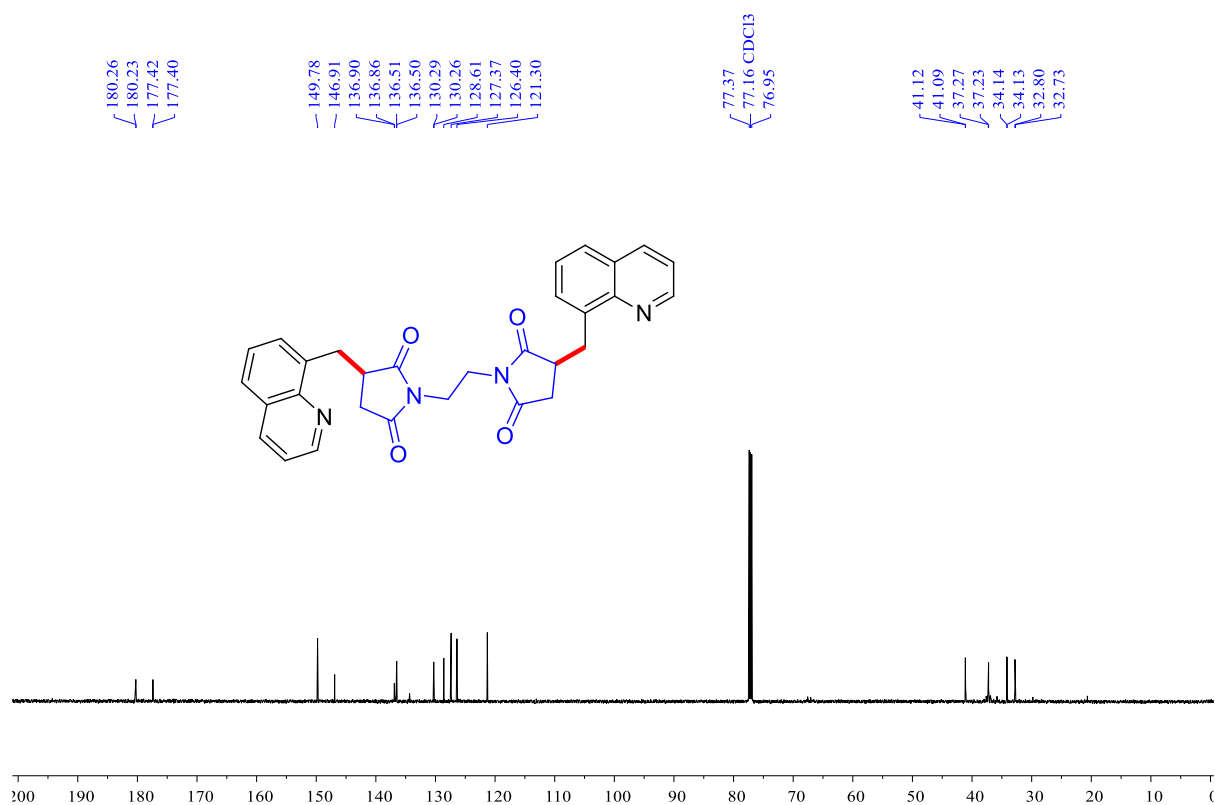

**1-methyl-3-(1-(quinolin-8-yl)ethyl)pyrrolidine-2,5-dione (Table 2, entry 3sa):**

**$^1\text{H}$  NMR**

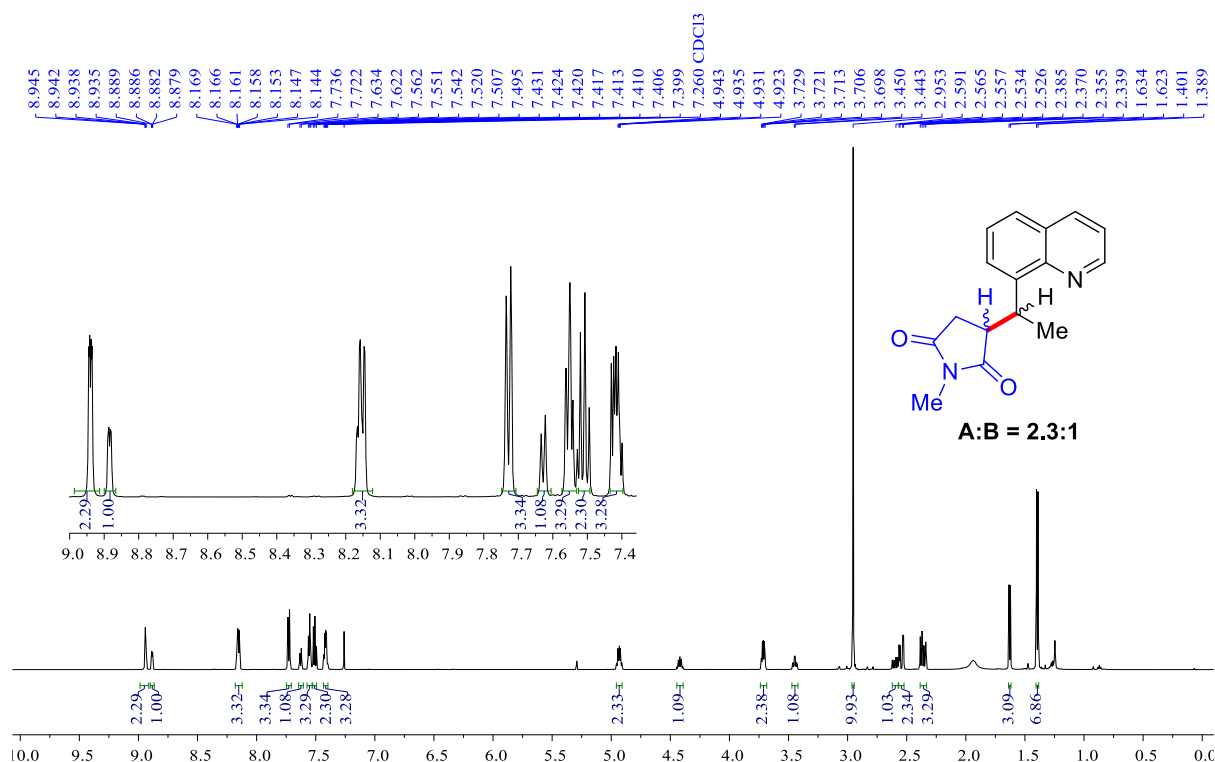

**$^{13}\text{C}$  NMR**

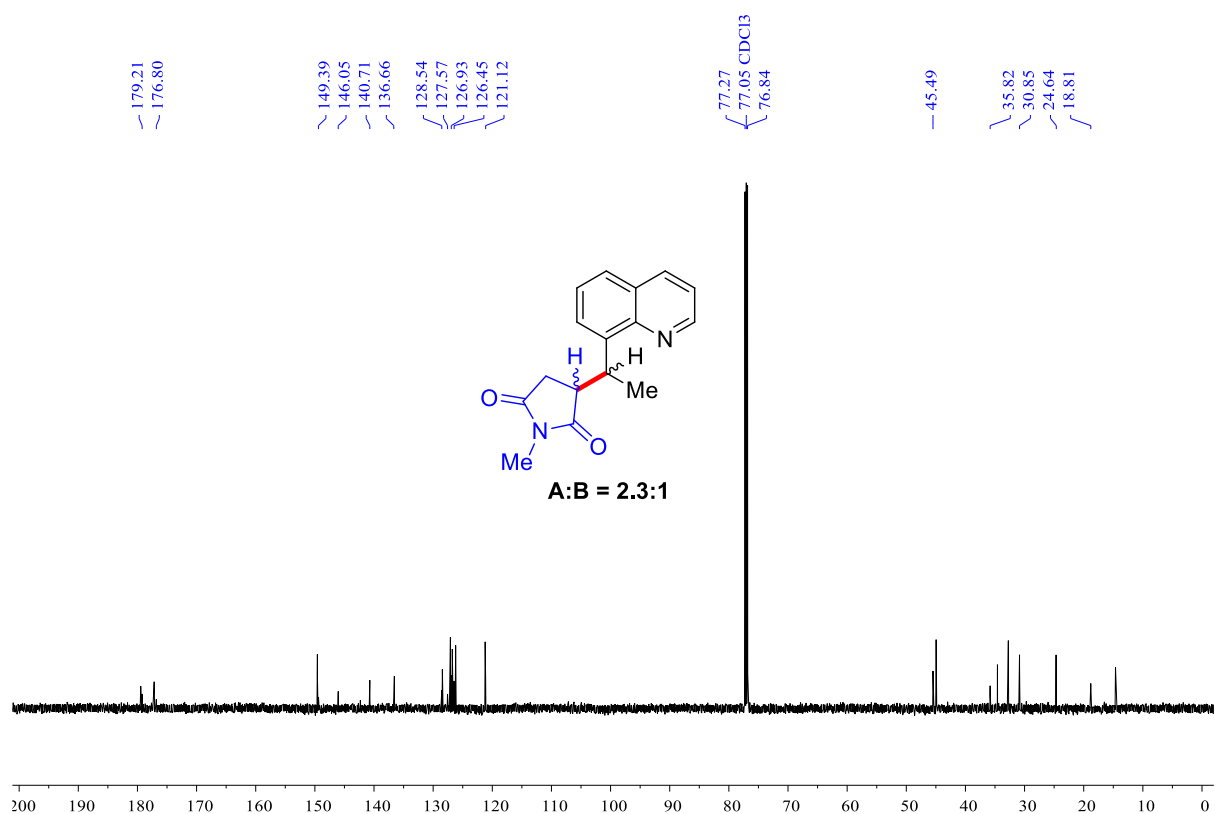



**1-phenyl-3-(1-(quinolin-8-yl)ethyl)pyrrolidine-2,5-dione (Table 4, entry 5aj)**

**<sup>1</sup>H NMR**

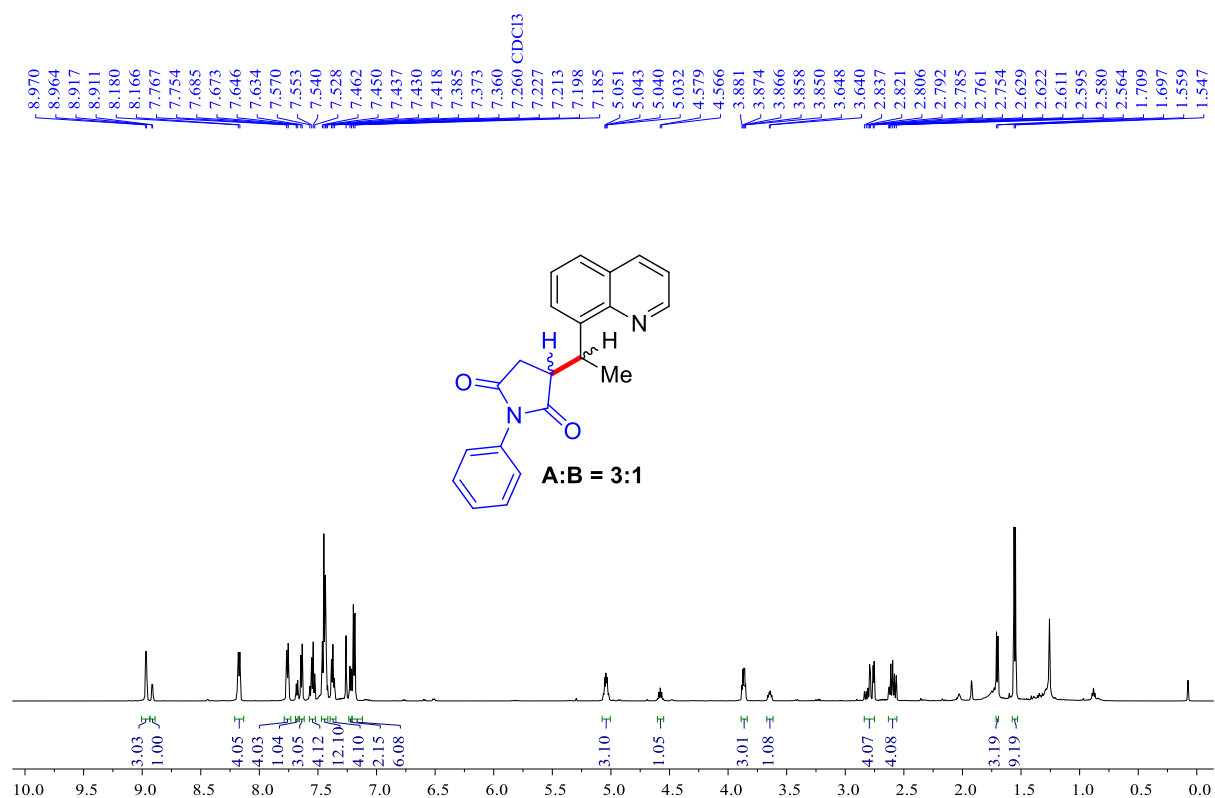

**<sup>13</sup>C NMR**

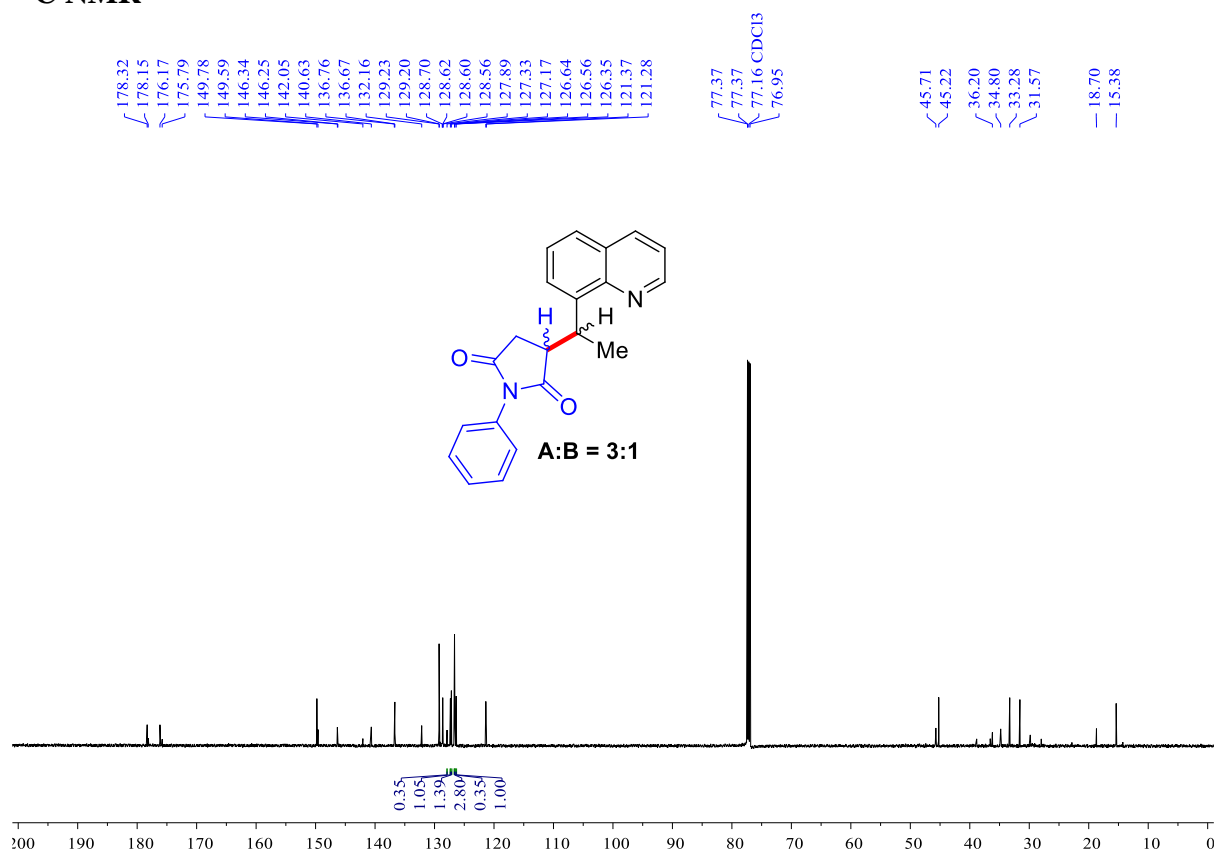

**1-(3-Chloro-4-methylphenyl)-3-(1-(quinolin-8-yl)ethyl)pyrrolidine-2,5-dione (Table 4, entry 5a):**

**<sup>1</sup>H NMR**

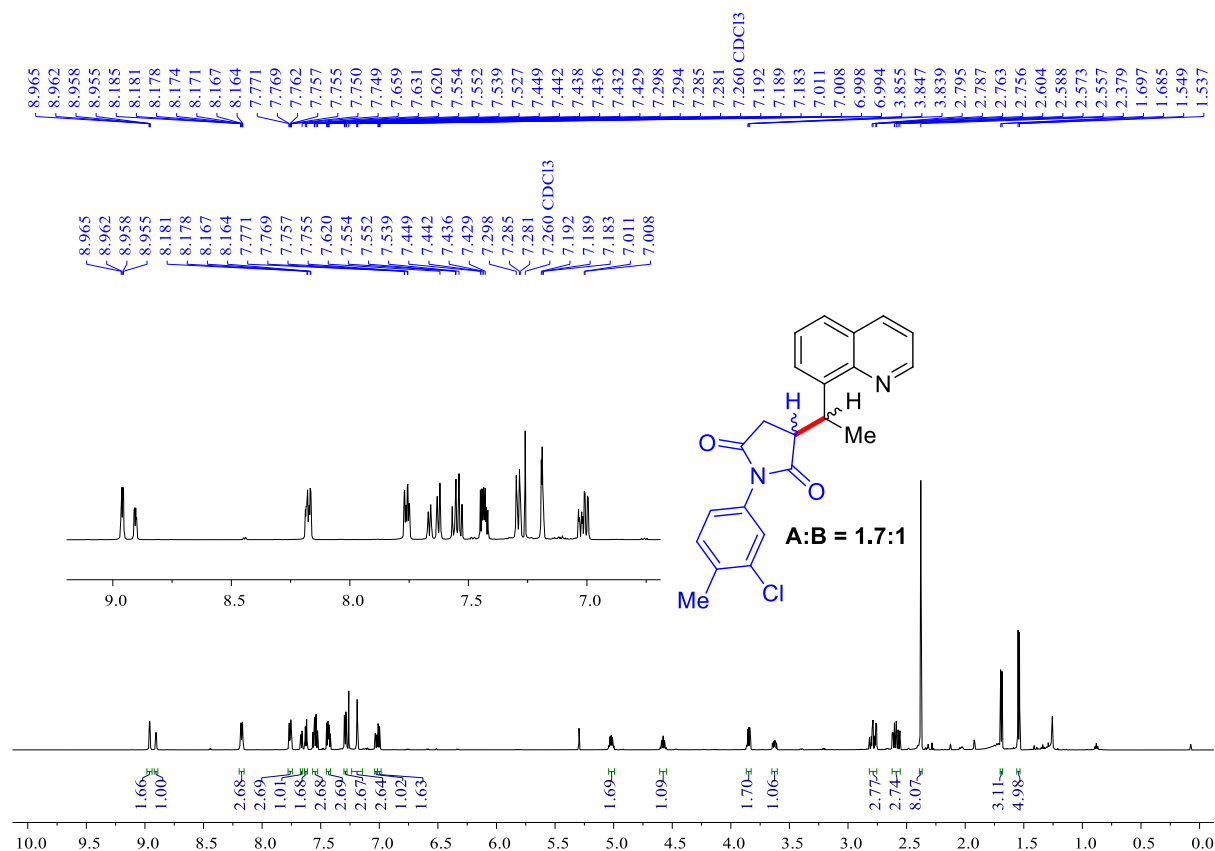

**<sup>13</sup>C NMR**

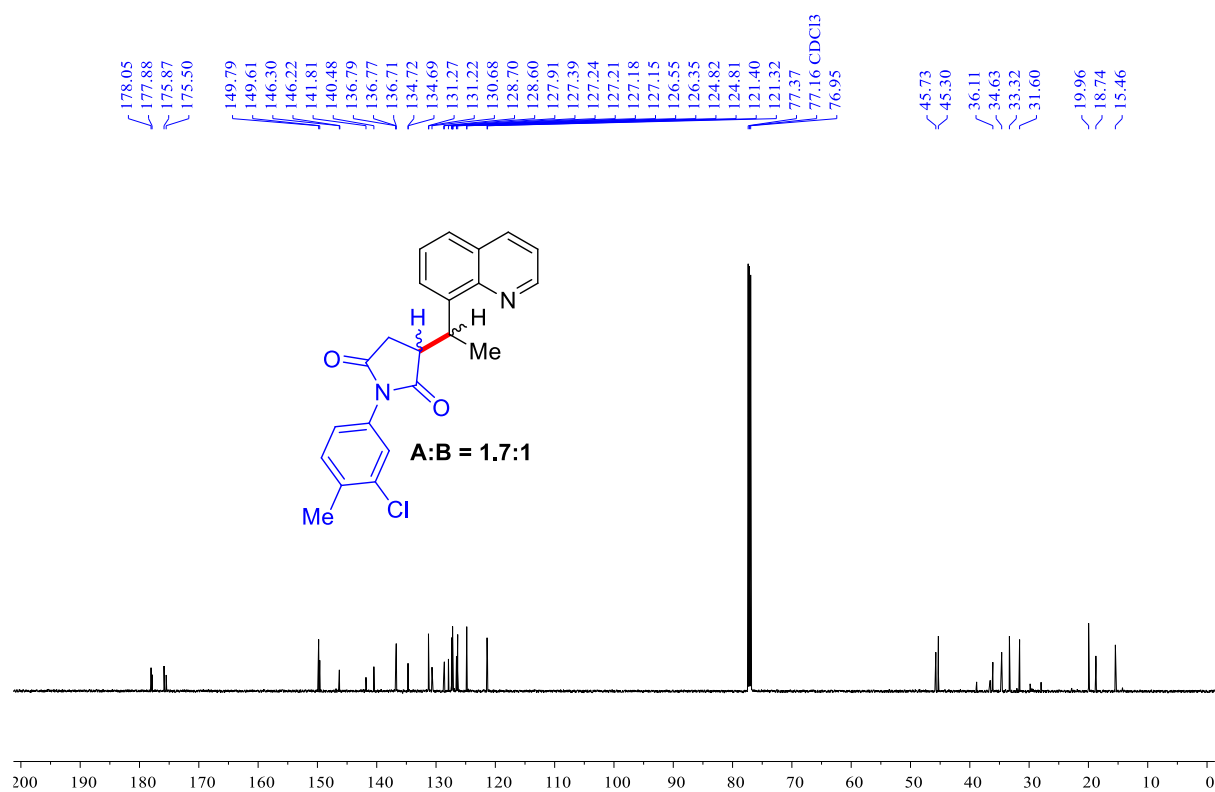

Supplement: Supplementary file 1 [file 14162414]
